# Supplementary material for: Effectiveness of a targeted lifestyle intervention in primary care on diet and physical activity among South Asians at risk for diabetes: 2-year results of a randomised controlled trial in the Netherlands
Source: PubMed Central journal article supplement — BMJ Open. 2017 Jul 2;7(6):e012221. doi: 10.1136/bmjopen-2016-012221 (PMC5734200; doi:10.1136/bmjopen-2016-012221), 2017-07-02
Supplement: bmjopen-2016-012221.draft_revisions.pdf [file bmjopen-2016-012221.draft_revisions.pdf]

# BMJ Open

## EFFECTIVENESS OF A TARGETED LIFESTYLE INTERVENTION IN PRIMARY CARE ON DIET AND PHYSICAL ACTIVITY AMONG SOUTH ASIANS AT RISK OF DIABETES: 2-YEAR RESULTS OF A RANDOMISED CONTROLLED TRIAL

|                                    |                                                                                                                                                                                                                                                                                                                                                                                                                                                                                                             |
|------------------------------------|-------------------------------------------------------------------------------------------------------------------------------------------------------------------------------------------------------------------------------------------------------------------------------------------------------------------------------------------------------------------------------------------------------------------------------------------------------------------------------------------------------------|
| Journal:                           | <i>BMJ Open</i>                                                                                                                                                                                                                                                                                                                                                                                                                                                                                             |
| Manuscript ID                      | bmjopen-2016-012221                                                                                                                                                                                                                                                                                                                                                                                                                                                                                         |
| Article Type:                      | Research                                                                                                                                                                                                                                                                                                                                                                                                                                                                                                    |
| Date Submitted by the Author:      | 12-Apr-2016                                                                                                                                                                                                                                                                                                                                                                                                                                                                                                 |
| Complete List of Authors:          | Vlaar, Everlina; AMC, Public Health; GGD Flevoland<br>Nierkens, Vera; AMC, Public Health; Leiden University Medical Center,<br>Public Health and Primary Health Care<br>Nicolaou, Mary; Academic Medical Centre, Public Health<br>Middelkoop, Barend; Leiden University Medical Centre, Public Health and<br>Primary Health Care<br>Busschers, Wim; AMC, Public Health<br>Stronks, Karien; Academic Medical Centre / University of Amsterdam,<br>Public Health<br>van Valkengoed, Irene; AMC, Public Health |
| <b>Primary Subject<br>Heading</b>: | Diabetes and endocrinology                                                                                                                                                                                                                                                                                                                                                                                                                                                                                  |
| Secondary Subject Heading:         | Nutrition and metabolism, General practice / Family practice                                                                                                                                                                                                                                                                                                                                                                                                                                                |
| Keywords:                          | type 2 diabetes, South Asians, diet, physical activity, intervention                                                                                                                                                                                                                                                                                                                                                                                                                                        |
|                                    |                                                                                                                                                                                                                                                                                                                                                                                                                                                                                                             |

SCHOLARONE™  
Manuscripts

1  
2  
3 **Effectiveness of a targeted lifestyle intervention in primary care on diet and physical**  
4 **activity among South Asians at risk of diabetes; 2-year results of a randomised**  
5 **controlled trial**  
6  
7  
8  
9  
10  
11  
12

13  
14 E.M.A. Vlaar<sup>1,2</sup>, V. Nierkens<sup>1,3</sup>, M. Nicolaou<sup>1</sup>, B.J.C. Middelkoop<sup>3</sup>, W.B. Busschers<sup>1</sup>, K.  
15 Stronks<sup>1</sup>, I.G.M. van Valkengoed<sup>1</sup>  
16  
17  
18  
19

20  
21 <sup>1</sup> Department of Public Health, Academic Medical Center, Amsterdam, The Netherlands

22  
23 <sup>2</sup> GGD Flevoland, Lelystad, The Netherlands (current affiliation)

24  
25 <sup>3</sup> Department of Public Health and Primary Health Care, Leiden University Medical Center,  
26  
27 The Netherlands  
28  
29  
30  
31  
32  
33  
34  
35  
36  
37  
38  
39  
40

41 *Corresponding author:*

42  
43 Irene G.M. van Valkengoed, Department of Public Health, Academic Medical Center,  
44  
45 University of Amsterdam, Meibergdreef 9, J2.209, 1105 AZ Amsterdam, The Netherlands

46  
47 Telephone: +31 (0)20 - 566 5342

48  
49 Fax: +31 (0)20 - 697 2316

50  
51 Email: i.g.vanvalkengoed@amc.nl  
52  
53  
54  
55  
56  
57  
58  
59  
60

## ABSTRACT

**Objectives.** In South Asian populations, little is known about the effects of intensive interventions to reduce the risk of type 2 diabetes on health behaviour. We examined the effectiveness at 2 years of a culturally-targeted lifestyle intervention on diet, physical activity and determinants of behaviour change among South Asians at risk of diabetes.

**Design.** Randomised controlled trial with de facto masking

**Setting.** Primary care.

**Participants.** A total of 536 18-60 year old South Asians at risk of diabetes (i.e. with impaired glucose tolerance, impaired fasting glucose, or relatively high insulin resistance) were randomised to the intervention (n=283) or a control (n=253) group. Data of 314 participants (n= 165 intervention, n=149 control) were analysed.

**Interventions.** The culturally-targeted intervention consisted of individual counselling using motivational interviewing (6-8 sessions in the first 6 months plus 3-4 booster sessions), a family session, cooking classes, and a supervised physical activity programme. The control group received generic lifestyle advice.

**Outcome measures.** We compared changes in physical activity, diet and social-cognitive underlying determinants between the two groups at 2-year follow-up.

**Results.** At 2-year follow-up participants in the intervention group were more moderately-to-vigorously active than at baseline but, compared with changes in the control group, the difference was not significant (change min/week 142.9 versus 0.5,  $p=0.672$ ). Also, no significant difference was found between the two groups in changes on any of the components of the diet or the social-cognitive determinants of diet and physical activity.

**Conclusions.** The culturally-targeted lifestyle intervention led to high drop-out and was not effective in promoting healthy behaviour among South Asians at risk of diabetes. Given the

1  
2  
3 high *a priori* risk, we recommend to develop new strategies, preferably more accessible, to  
4  
5 promote healthy behaviour.  
6

7 **Trial registration:** NTR1499; [www.trialregister.nl/trialreg/admin/rctview.asp?TC=1499](http://www.trialregister.nl/trialreg/admin/rctview.asp?TC=1499)  
8  
9

### 10 11 **Strengths and limitations of this study** 12

- 13  
14 - The intensive intervention in this trial was culturally targeted, based on a needs  
15 assessment and formative research, to characteristics of South Asians living in the  
16 Netherlands.  
17  
18
- 19  
20 - This study reports on physical activity, diet as well as the determinants of behaviour  
21 change, thus contributing to the yet limited knowledge about the effects of intensive  
22 interventions on behavioural measures among South Asians.  
23  
24
- 25  
26 - Potential selection related to the relatively low participation and high drop-out from  
27 the trial may have led to a biased estimate of intervention effects.  
28  
29
- 30  
31 - We assessed the intervention effects on health behaviours with selfreported measures,  
32 which may be influenced by various reporting biases.  
33  
34  
35  
36  
37  
38  
39  
40  
41  
42  
43  
44  
45  
46  
47  
48  
49  
50  
51  
52  
53  
54  
55  
56  
57  
58  
59  
60

## BACKGROUND

Diet and physical activity are key modifiable risk factors for type 2 diabetes mellitus (T2D), and interventions targeting these behaviours can help to prevent or postpone this disease [1-5]. Efficacy trials have shown that, in high-risk individuals, the onset of T2D may be prevented or postponed through individual diet counselling and physical activity guidance through reduction in weight and waist circumference [2-5]. Trials in a standard care setting aimed at promoting a healthy diet and physical activity have yielded similar, albeit more modest, results [6-8].

South Asian migrants and their offspring (hereafter referred to as 'South Asians') living in high-income countries are, in particular, at high risk for T2D [9-13]. Strategies targeting diet and physical activity have been implemented to reduce this increased risk among these populations. However, the trials evaluating intensive diet counselling and physical activity guidance in South Asian populations in the UK and in the Netherlands yielded only moderate results in terms of the reduction of weight and waist circumference [14-15].

One of the reasons for the moderate results could be that, in these trials, the interventions implemented do not lead to the intended changes in dietary behaviour and physical activity. However, little is known about the effects of intensive interventions on behavioural measures among South Asians [16]. These measures not only include dietary behaviour and physical activity, but also social-cognitive determinants (such as self-efficacy) as a result of which changes in these behaviours occur [17-19].

1  
2  
3  
4  
5 Therefore, the present study aims to analyse the effectiveness of an intervention among South  
6  
7 Asians living in the Netherlands aimed at preventing T2D, with regard to changes in dietary  
8  
9 habits, physical activity, and the social-cognitive determinants of behaviour change.

10  
11 Whereas our earlier study described the effects of this intervention on weight and other  
12  
13 metabolic outcomes after one year [14], the effects on behavioural measures have not yet been  
14  
15 investigated. In that intervention, motivational interviewing and tailored risk information were  
16  
17 used to address social-cognitive factors underlying dietary behaviour and physical activity,  
18  
19 including risk perception, attitudes, social support, and self-efficacy. The intervention was  
20  
21 based on a needs assessment and formative research, and targeted to characteristics of South  
22  
23 Asians living in the Netherlands.  
24  
25  
26  
27  
28  
29  
30  
31  
32  
33  
34  
35  
36  
37  
38  
39  
40  
41  
42  
43  
44  
45  
46  
47  
48  
49  
50  
51  
52  
53  
54  
55  
56  
57  
58  
59  
60

## METHODS

### Study population

All those included in the present investigation were participants of the DHIAAN study: this is a randomised controlled trial (no. NTR1499) investigating the effectiveness of a culturally-targeted intensive lifestyle intervention to prevent T2D and cardiovascular risk factors among South Asian Surinamese in primary care [20]. The primary outcomeThe term South Asian Surinamese (or Hindustani Surinamese) refers to people of South Asian ancestral origin and their offspring who migrated to the Netherlands via Suriname. The South Asian Surinamese are descendants of the labourers from North India (Uttar Pradesh, Uttaranchal, and West Bihar) who were indentured between 1873 and 1917. The two large migration waves of South Asian Surinamese to the Netherlands were caused mainly by the political situation in Suriname. The first wave took place at the time of the independence of Suriname in 1975 and the second wave (at the time of Desi Bouterse's coup) in February 1980 [21].

Details of the DHIAAN study, including changes to the original protocol, and the process of adapting the lifestyle intervention for the social-cultural and social-cognitive determinants of South Asian Surinamese, are already published [20,22]. In brief, 2307 South Asian Surinamese (aged 18-60 years) living in The Hague (the Netherlands), were screened via general practices between 18 May 2009 and 11 October 2010 (Fig. 1). To achieve a high response rate, a culturally-targeted intensive recruitment strategy was used that was proven feasible in the pilot of the DHIAAN study [20]. General practitioners (GPs) sent each potential participant an invitation, together with a reply card that could be returned if further contact was not wanted. Invitees who did not respond received a written reminder and were also contacted by telephone.

1  
2  
3 All potential participants were requested to fill out a brief questionnaire, undergo a physical  
4 examination, and provide a fasting blood sample. The 968 participants who were invited and  
5 screened between 18 May 2009 and 18 April 2010 also took an oral glucose tolerance test (75  
6  
7  
8  
9  
10 g).

### 14 **Inclusion in the trial**

15  
16 Screened participants with impaired fasting glucose (fasting glucose of 5.6-6.9 mmol/l),  
17 impaired glucose tolerance (2-hour post-load glucose of 7.8-11.0 mmol/l), a glycated  
18 haemoglobin (HbA1c) level of  $\geq 42$  mmol/mol, and/or a value of  $\geq 2.39$  for the homeostasis  
19 model assessment-insulin resistance (HOMA-IR) were invited to participate in the trial [20]  
20  
21  
22  
23  
24  
25 (Fig. 1).  
26  
27  
28

29  
30 Excluded was anyone who was already involved in a lifestyle programme, was pregnant, had  
31 a chronic disease that made participation in the intervention impossible, and/or used drugs  
32 that interfered with plasma glucose levels. Also excluded were participants with newly  
33 diagnosed T2D (i.e. a fasting glucose  $\geq 7.0$  mmol/l, a 2-h post-load glucose  $\geq 11.0$  mmol/l, or a  
34 HbA1c level  $\geq 48$  mmol/mol); these persons were referred to regular clinical care.  
35  
36  
37  
38  
39  
40  
41  
42

43 As described previously in more detail [14,20], 536 people were randomly assigned to either  
44 the intervention or the control group using a computer-generated randomisation list (simple  
45 randomisation). Family or household members (defined by postal code and house number)  
46 were assigned to the same group. Participants were informed about the procedures for the arm  
47 of the trial that they were assigned to; the masking (de facto masking) of the two groups was  
48 maintained throughout the trial.  
49  
50  
51  
52  
53  
54  
55  
56  
57  
58  
59  
60



1  
2  
3 The study was approved by the Institutional Review Board of the Academic Medical Center,  
4  
5 Amsterdam. All participants provided both oral and written informed consent.  
6  
7

### 8 9 **Intervention group**

10 All participants in the intervention group were offered a culturally-targeted lifestyle  
11  
12 intervention [22]. The design of this intervention was in line with the design of the proven  
13  
14 efficacious intervention used in the Study on Lifestyle Intervention and Impaired Glucose  
15  
16 Tolerance Maastricht (SLIM), which aimed to evaluate the effect of that intervention on  
17  
18 glucose tolerance in a European Dutch population [23]. For the present study, the latter  
19  
20 intervention was culturally adjusted to the South Asian Surinamese population, as cultural  
21  
22 adaptations are likely to promote the effectiveness of interventions among specific ethnic  
23  
24 populations [24]. Both surface and deep structure adaptations were used to make the  
25  
26 intervention attractive, appropriate and ultimately more potentially effective in the present  
27  
28 study population [22].  
29  
30  
31  
32  
33  
34  
35

36 The intervention was designed to be carried out by dietitians within their usual practice  
37  
38 setting. The aim was to meet current national guidelines for diet and physical activity [25,26].  
39  
40 In the first 6 months, dietitians used motivational interviewing during 6-8 individual lifestyle  
41  
42 counselling sessions, followed by 3-4 booster sessions over the following 18 months. The  
43  
44 dietitians were trained in motivational interviewing, in which previous successes, skills and  
45  
46 strengths of the client were highlighted to support self-efficacy [27]; dietitians were also  
47  
48 familiar with the South Asian culture and dietary habits. Special attention was paid to  
49  
50 generate appropriate risk perception, a positive attitude towards a healthy lifestyle, and the  
51  
52 possible barriers and motivating factors specific to the South Asian population; these were  
53  
54 elicited from the literature and focus group discussions [22].  
55  
56  
57  
58  
59  
60

1  
2  
3 In addition, dieticians offered a family session at the participant's home, with the aim to  
4 engage the family in supporting the individual participant in achieving dietary goals.

5  
6  
7 Participants were also offered two group-based cooking classes to increase their self-efficacy  
8 in and to learn skills for adjusting traditional dishes to meet nutritional guidelines.

9  
10  
11  
12  
13  
14 Furthermore, we offered a 20-week physical activity programme to all participants in the  
15 intervention group. This 'exercise on prescription' programme is described elsewhere [28-30].  
16  
17 Trained coaches monitored participation in the programme.  
18  
19

### 20 21 22 23 **Control group**

24  
25 Participants in the control group were invited to join two group sessions led by student  
26 dieticians (at baseline and after 6 months). The sessions provided generic information about  
27 T2D and discussed current guidelines for diet and physical activity. These participants  
28 received two leaflets (at 3 and 9 months) with simple, generic lifestyle advice.  
29  
30  
31  
32  
33  
34  
35

### 36 37 **Data collection**

38  
39 Trial visits were planned for both groups at baseline, and after 1 and 2 years [20]. The  
40 invitation procedures for these visits were similar to the intensive procedures used during the  
41 screening. Participants who did not respond to the invitation for the follow-up visit were  
42 contacted by telephone and received a written reminder. In addition to written confirmation of  
43 their appointment, all participants received a text message reminder the day before their  
44 appointment.  
45  
46  
47  
48  
49  
50

51  
52  
53  
54 During the visit, a trained interviewer conducted a face-to-face interview with each  
55 participant. Trained research staff used a standardised protocol for the physical examinations.  
56  
57  
58  
59  
60

1  
2  
3 They measured weight on a mechanical scale (Seca 761, Hamburg, Germany) to the nearest  
4  
5 500 g and height was measured to the nearest 0.01 m. The anthropometric measurements were  
6  
7 obtained twice and the means were used for analysis.  
8  
9

10  
11 During all visits, all participants provided a fasting blood sample and were offered an oral  
12  
13 glucose tolerance test. Measurements of fasting plasma glucose and 2-hour post-load glucose  
14  
15 (oral glucose tolerance test, 75 g; hexokinase, Roche Diagnostics), HbA1c (high-performance  
16  
17 liquid chromatography), and insulin (immunoassay, sandwich principle, Roche Diagnostics)  
18  
19 were carried out according to a standardised protocol at the SHL Group (laboratory), Etten-  
20  
21 Leur (the Netherlands). The HOMA-IR was calculated as glucose (mmol/l) multiplied by  
22  
23 fasting insulin (mU/l) divided by 22.5 [31].  
24  
25  
26  
27  
28

29 Data on participation were recorded by dieticians and obtained from the process data collected  
30  
31 from participants during the first year [20].  
32  
33  
34  
35

### 36 **Measurements and definitions**

37  
38 Physical activity, diet, and social-cognitive determinants of behaviour change were noted  
39  
40 during the trial visits [23,32]. Physical activity was assessed with the Short Questionnaire to  
41  
42 Assess Health-enhancing Physical Activity (SQUASH), supplemented with culturally-specific  
43  
44 activities [33,34]. Three measures were defined: i) any versus no moderate-to-vigorous  
45  
46 activity, ii) the total moderate-to-vigorous activity expressed in min/week, and iii) the total  
47  
48 activity expressed in min/week.  
49  
50  
51

52  
53  
54 Dietary intake was determined using questions based on the national guidelines for a healthy  
55  
56 diet, supplemented with questions on group-specific dietary behaviours of the South Asian  
57  
58

1  
2  
3 population [22,25]. Fruit, vegetables, rice, and whole wheat intake was assessed with multi-  
4  
5 item questions (with 3, 2, 2, and 11 items, respectively) to determine the quantity and  
6  
7 frequency. Moreover, two single-item questions addressed the regularity of the meals. These  
8  
9 aspects of the diet were dichotomised into meeting versus not meeting the guideline (Box 1).  
10  
11

### 12 13 **Box 1. Categories used for meeting the dietary guidelines**

|                           | Meeting the guideline <sup>a</sup>            |
|---------------------------|-----------------------------------------------|
| 17 Fruit intake           | 2 pieces of fruit/day                         |
| 18 Vegetable intake       | 200 g vegetables/day                          |
| 20 Whole wheat intake     | Almost exclusively whole wheat<br>22 products |
| 23 Regular eating pattern | 3 meals/day at a regular time                 |
| 24 Rice intake            | Almost exclusively brown rice                 |

25  
26  
27 <sup>a</sup>Derived from the current national guidelines for diet [25], with the exception of rice for  
28 which no guideline has been established.  
29  
30  
31

### 32 **Social-cognitive determinants of behaviour change**

33  
34 Risk perception consisted of measures of perceived susceptibility and two components of  
35  
36 Leventhal's common-sense model of representations of illness and self-regulation [35], i.e.  
37  
38 causal beliefs and perceived controllability by physical activity. Causal beliefs were measured  
39  
40 with 12 statements about the perceived influence of certain behaviours or characteristics on  
41  
42 the onset of diabetes, on a 3-point Likert scale. The statements concerned (a) general lifestyle  
43  
44 beliefs related to seven general risk factors for diabetes, (b) three group-specific lifestyle  
45  
46 beliefs (consumption of masala and large amounts of white rice and sugar) derived from our  
47  
48 focus group discussions, and (c) two heredity beliefs (e.g. family history of diabetes and being  
49  
50 a South Asian) [22, 36]. The general lifestyle beliefs related to overweight, unhealthy food,  
51  
52 insufficient exercise, hypertension, age, and smoking were combined into a single factor  
53  
54 based on the results of internal consistency analysis (n=6,  $\alpha=0.63$ ; a score of  $\geq 4$  indicating  
55  
56  
57  
58  
59  
60

1  
2  
3 'perceiving general lifestyle as a cause of type 2 diabetes mellitus'). Perceived controllability  
4 with physical activity was measured by a single item on a 5-point Likert scale. Perceived  
5 susceptibility was measured with a 3-item perceived susceptibility score, on a 5-point Likert  
6 scale (n=3,  $\alpha=0.63$ ) [37].  
7  
8  
9

10  
11  
12  
13  
14 Internal consistency analysis resulted in three factors for attitudes towards physical activity  
15 and diet: direct (enjoyment and importance; n=4,  $\alpha=0.64$ ) and indirect attitude towards  
16 physical activity (possible consequences of increasing physical activity; n=7,  $\alpha=0.67$ ), and the  
17 attitude towards conventional healthy dietary behaviours (enjoyment and importance of a  
18 regular eating pattern and breakfast, fruit, vegetable, whole wheat intake; n=10,  $\alpha=0.84$ ). We  
19 also measured the attitudes (enjoyment and importance) towards two group-specific healthy  
20 dietary behaviours (replacing white rice with brown rice, and refusing snacks at parties).  
21  
22  
23  
24  
25  
26  
27  
28  
29  
30

31  
32 Two factors were formed for social support: perceived social support for physical activity  
33 from other family members and close relatives (n=2,  $\alpha=0.68$ ), and perceived social support  
34 for the conventional healthy dietary behaviours (n=5,  $\alpha=0.94$ ). We also measured the  
35 perceived social support for physical activity from the spouse and the perceived social support  
36 for two group-specific healthy dietary behaviours (replacing white rice with brown rice, and  
37 refusing snacks at parties).  
38  
39  
40  
41  
42  
43  
44  
45  
46

47  
48 Self-efficacy was reflected in two combined factors: perceived self-efficacy for physical  
49 activity (n=5,  $\alpha=0.73$ ), and perceived self-efficacy for the conventional healthy dietary  
50 behaviours (n=5,  $\alpha=0.66$ ). Moreover, we measured self-efficacy expectations for two group-  
51 specific healthy dietary behaviours (replacing white rice with brown rice, and refusing snacks  
52 at parties).  
53  
54  
55  
56  
57  
58  
59  
60

1  
2  
3 The stages of change towards diet and physical activity were classified as being motivated or  
4 not motivated to change one's diet according to the Dutch guidelines, and physical activity  
5 within 6 months. The stage of change towards diet was measured for each specific dietary  
6 behaviour. One factor was formed for stage of change towards the conventional healthy  
7 dietary behaviours (n=5,  $\alpha=0.73$ ).  
8  
9  
10  
11  
12

13  
14  
15  
16 For analysis, we dichotomized all resulting variables, e.g. perceiving versus not perceiving  
17 having a family history of diabetes as cause. In addition, as the group-specific items (e.g.  
18 refusing snacks at parties) did not load on the aforementioned scales, we decided to include  
19 these in the analysis as single items.  
20  
21  
22  
23  
24  
25  
26

### 27 **Other factors**

28  
29 Age and gender were determined from the GPs' registries. Education level was measured at  
30 the initial screening. The categories for education level were low (primary education or less),  
31 intermediate (lower vocational training, lower secondary education, intermediate vocational  
32 training, and higher secondary education), and high (higher professional training or  
33 university). A family history of diabetes was defined as having a first- or second-degree  
34 family member with diabetes. Body mass index (BMI) was calculated as weight (kg)/height  
35 (m)<sup>2</sup>.  
36  
37  
38  
39  
40  
41  
42  
43  
44  
45  
46

### 47 **Statistical analysis**

48  
49 In the current analysis we included all those who participated in both the baseline  
50 measurement and measurement at 2-year follow-up, and excluded anyone without data on  
51 physical activity or diet at baseline and/or at 2-year follow-up (Figure 1). This means that 314  
52 participants remained for the present analysis: 165 in the intervention group with a mean  
53  
54  
55  
56  
57  
58  
59  
60

1  
2  
3 follow-up time of 22.1 (21.0-23.8) months and 149 in the control group with a mean follow-  
4  
5 up time of 22.1 (21.3-23.2) months.  
6  
7

8  
9 The means [standard errors (SE)], medians (IQR), or n (percentages) are used to describe the  
10  
11 baseline characteristics of the remaining participants in both groups. Baseline differences  
12  
13 between groups were checked using independent sample t-tests, Mann-Whitney U tests and  
14  
15 chi-square tests. In addition, for those in the intervention group, their participation in elements  
16  
17 of the intervention was described, i.e. dietary counselling, cooking classes, family sessions  
18  
19 and/or the exercise programme.  
20  
21  
22

23  
24  
25 Changes in physical activity, diet and the social-cognitive determinants of behaviour change  
26  
27 are also described. For the continuous measures, the mean difference was determined in  
28  
29 changes between baseline and 1 and 2-year follow-up, respectively. For the other measures,  
30  
31 we determined the percentage of participants with a positive change (e.g. from non-adherence  
32  
33 to adherence to the guideline for fruit intake) or a negative change (e.g. from a regular to an  
34  
35 irregular meal pattern) at 1 and 2-year follow-up. Except for the belief that masala intake is a  
36  
37 possible cause of diabetes, and the attitude towards refusing snacks at parties, positive  
38  
39 changes were expected to positively influence lifestyle behaviour and health. Independent  
40  
41 sample t-tests were used to compare the mean changes, and chi-square tests and (where  
42  
43 relevant) Fisher's exact tests were used to compare the percentage positive and negative  
44  
45 changes between the two groups. To avoid additional testing, this was only done for the  
46  
47 changes at 2-year follow-up, as the present analysis focuses on the effects two years post-  
48  
49  
50  
51  
52 baseline.  
53  
54  
55  
56  
57  
58  
59  
60

1  
2  
3 In the present study we did not consider multiple imputations or more complex modelling of  
4  
5 patterns of missingness. This decision was based on a comparison of the baseline  
6  
7 characteristics between participants with and those without a measurement at 2-year follow-  
8  
9 up. Apart from being younger and having a higher HOMA-IR, those who participated in the  
10  
11 measurement at 2-year follow-up had baseline characteristics similar to those who dropped-  
12  
13 out (Online supplement 1). Drop-out was similar in both groups [age and sex adjusted OR  
14  
15 1.02 (0.72-1.45)], and these differences did not vary by age or gender ( $p>0.05$  for the  
16  
17 interaction terms). In addition, we analysed different patterns of missingness in relation to the  
18  
19 reported total physical activity, meal pattern and whole wheat consumption, using a pattern  
20  
21 mixture model in the total study population and found no significant evidence for an effect  
22  
23 (data not shown).  
24  
25  
26  
27  
28

29 We did not perform multilevel analysis with the data on dieticians. In line with previous  
30  
31 analyses of the DHIAAN data [14, 32], no evidence was found for dependencies between  
32  
33 participants registered with the same dietician (data not shown). Furthermore, as only 29  
34  
35 people with family members in the study had follow-up data available, no multilevel analysis  
36  
37 was performed on family data.  
38  
39  
40  
41  
42

43 The SPSS 19.0 (SPSS Inc., Chicago, Illinois, USA) and R2.15.3 (R Foundation for Statistical  
44  
45 Computing, 2009) were used for the analyses. A p-value  $<0.05$  was considered to be  
46  
47 statistically significant.  
48  
49  
50  
51  
52  
53  
54  
55  
56  
57  
58  
59  
60



## RESULTS

### *Baseline characteristics*

At baseline, both groups were similar in terms of demographic characteristics and physical activity (Table 1 and 2). Most of the participants reported to be moderately-to-vigorously active: 82% of the intervention group and 79% of the control group (Table 2). Moreover, at baseline, similar proportions in both groups met the guidelines for fruit, whole wheat intake, a regular meal pattern, and use of brown rice. However, vegetable intake differed between the groups: 68% of the intervention group ate 200 g of vegetables/day compared with 56% of the control group. At baseline, the social-cognitive determinants (with the exception of enjoyment of snacks) were also similar in both groups (Table 3). The observed percentage of people with a positive response varied largely between the determinants. For example,  $\geq 90\%$  of both groups had a positive attitude toward physical activity and a healthy diet, whereas  $\leq 50\%$  of the population reported to experience social support from their partner regarding healthy behaviour.

### *Participation in the intervention*

In the intervention group, 81.8% of the respondents participated in the intake for the individual lifestyle counselling sessions. Of this latter group, 94.8% attended at least one additional session, with a median number of eight sessions (IQR 4-9) per person (in addition to the initial intake visit). Moreover, 14.4% participated in a supplemental family session, 12.7% in the cooking classes and 26.3% in the supervised exercise sessions.

### *Effect of the intervention on physical activity and diet*

Participants in the intervention group were more moderately-to-vigorously active at 2-year follow-up than at baseline but, compared with the change in the control groups, the difference

1  
2  
3 was not significant (Table 2). In addition, while more participants in the intervention group  
4  
5 than in the control group met the guidelines for several dietary behaviours (e.g. whole wheat  
6  
7 intake, eating brown rice and fruit) at 2-year follow-up, none of these changes significantly  
8  
9 differed between the groups (Table 2).  
10

11  
12  
13  
14 Remarkably, a substantial percentage of people who were adherent to a specific guideline at  
15  
16 baseline were no longer adherent 1 or 2 years later ('negative' change). For most behaviours  
17  
18 this percentage is almost as high as the percentage 'positive' change.  
19  
20

#### 21 22 23 *Effect of the intervention on social-cognitive determinants of behaviour change*

24  
25 At 2-year follow-up, no significant difference was found between the two groups in any of the  
26  
27 social-cognitive determinants of behaviour change (Table 3). A positive change was observed  
28  
29 in several of the social-cognitive determinants of behaviour change among part of the  
30  
31 intervention group and similar changes were observed in the control group. For instance,  
32  
33 22.4% of those in the intervention group who did not perceive themselves as susceptible at  
34  
35 baseline, perceived themselves as susceptible to the onset of diabetes after 2 years; in the  
36  
37 control group, this figure was 21.5% ( $p=0.941$  for the difference between groups). Similar to  
38  
39 the results for dietary behaviour and physical activity, remarkably high percentages of  
40  
41 participants showed a 'negative' change in social-cognitive determinants.  
42  
43  
44  
45  
46  
47  
48  
49  
50  
51  
52  
53  
54  
55  
56  
57  
58  
59  
60

## DISCUSSION

This study examined the effect of a culturally-targeted intervention on behavioural measures on dietary behaviour and physical activity among a South Asian population at risk of T2D. At 2-year follow-up, no significant difference was found between the intervention and the control group in changes in any of the components of dietary and physical activity behaviour, or in the social-cognitive determinants underlying these behaviours. Notably, in both groups, the proportion of participants reporting a less healthy behaviour at 2-year follow-up almost equalled the proportion reporting a more healthy behaviour. The percentage of participants lost to follow-up was high.

### *Study Limitations*

In addition to a relatively low response rate for the initial screening and for the baseline evaluation, a relatively high number of participants dropped-out of the study. This low participation rate limits the reach and potential impact that the intervention may have in practice. In addition, we are aware that selective drop-out may lead to a biased estimate of intervention effects. However, analysis of the characteristics of those who dropped-out and the evaluation of patterns of missingness provided no clear evidence on the direction in which our estimates may have been biased. This is in line with our previous analyses on the longitudinal DHIAAN data at 1-year follow-up, that showed no relevant contribution of multiple imputations to the interpretation of our data [14].

In the interpretation of our results, it should also be noted that self-reported questionnaire data were used to assess the change in physical activity, diet and the determinants of behaviour change. We cannot exclude the possibility that our participants gave socially desirable answers [38]. As recommended, we added culturally-specific activities to the

1  
2  
3 physical activity questionnaire (such as yoga and dancing) to mitigate cultural differences in  
4 recommended physical activity [34]; nevertheless, the validity of this measurement may have  
5 been suboptimal. To measure diet, we included a limited number of questions on specific  
6 behaviours, which may be less reliable than biomarkers or a more complete measurement of  
7 food intake such as a food frequency questionnaire [39,40]. As a result, we may have missed  
8 more general positive changes in other aspects of the diet, potentially due to the intervention.  
9  
10  
11  
12  
13  
14  
15  
16  
17

18 In addition, because the reference period for the physical activity and diet questionnaire  
19 spanned a few months, the answers may have been influenced by recall bias [39]. Although  
20 the effect of these types of bias apply to both groups, the effects could differ between the  
21 groups, e.g. due to the focus on certain behaviours during the intensive counselling in the  
22 intervention group. However, this seems very unlikely given the small differences between  
23 the two groups in reported changes. Therefore, we conclude that it is unlikely that these  
24 methodological limitations have substantially biased the present results.  
25  
26  
27  
28  
29  
30  
31  
32  
33  
34  
35

### 36 *Discussion of main findings*

37  
38 At 2-year follow-up we found that a culturally-targeted lifestyle intervention in primary care  
39 did not change the dietary behaviour and physical activity of this group of South Asian people  
40 at risk of T2D. This is in line with our observation of no effect of the intervention on weight  
41 status and other metabolic risk factors at 1-year follow-up [14]. However, a lack of effect on  
42 metabolic outcomes at one year does not rule out the possibility that the health behaviours or  
43 the underlying determinants may still change due to the intervention. The results of the  
44 present study clearly show that this was not the case. On the contrary, the health behaviour of  
45 a substantial number of participants even deteriorated. This was unexpected given the  
46 intensity of our intervention, an element previously shown to increase the effectiveness of  
47  
48  
49  
50  
51  
52  
53  
54  
55  
56  
57  
58  
59  
60

1  
2  
3 such a lifestyle programme [41]. Although changes in reported behaviour may also be the  
4  
5 result of increased awareness among participants of their own (poor) diet and physical  
6  
7 activity, the negative finding matches the weight gain reported for some participants after one  
8  
9 year of follow-up [14].  
10

11  
12  
13  
14 There are several possible reasons for the lack of an effect of the intervention on health  
15  
16 behaviour. First, despite being classified as being at risk for diabetes (i.e. impaired glucose  
17  
18 tolerance, impaired fasting glucose, or relatively high insulin resistance) the participants were  
19  
20 relatively healthy and health conscious. For instance, the mean BMI was lower compared to  
21  
22 other, similar, populations [2-4, 6-8]. Moreover, a substantial part of our population met the  
23  
24 guidelines for a healthy diet at baseline and indicated that they considered physical activity  
25  
26 and a healthy diet important. These positive characteristics probably leave little room for  
27  
28 improvement with an intervention aimed at a healthy lifestyle alone. To effectively reduce the  
29  
30 burden of T2D among South Asians, future interventions should explore new strategies, e.g.  
31  
32 focus on more specific forms of physical activity [42]. In addition, the low initial response  
33  
34 rate in combination with the high drop-out rate raise the question whether an intensive  
35  
36 intervention as employed in this study is the optimal approach to reach those in need in this  
37  
38 high-risk population. More easily implemented interventions that reach a larger proportion of  
39  
40 those with an increased risk of T2D seem necessary in order to effectively reduce the risk of  
41  
42 T2D at population level.  
43  
44  
45  
46  
47  
48

49  
50 Secondly, the intervention primarily addressed the individual and only marginally targeted the  
51  
52 individual's environment. However, changes in the physical and social environment may  
53  
54 influence the accessibility to and the social norm towards a healthy lifestyle, making it easier  
55  
56 to make healthier lifestyle choices [18,43]. For instance, evidence from the EPODE  
57  
58  
59  
60

1  
2  
3 (Ensemble, Prévenons l'Obésité Des Enfants) approach suggests that environmental changes  
4 implemented by the private and public sectors are essential for behaviour change on the long  
5 term [44]. We attempted to make the intervention accessible by offering a local physical  
6 activity programme (involving the family) and having dieticians carry out the intervention as  
7 part of their dietician practice. However, we did not involve the private and public sectors to  
8 make adjustments to the immediate environment to facilitate healthier lifestyle choices, e.g. in  
9 local (South Asian) supermarkets or at work. In addition, involvement of the family at the  
10 start of the intervention (e.g. the family-based intervention among South Asians in the UK)  
11 [15], rather than in a separate family session, may have had greater impact as family  
12 influences can then be addressed more extensively. In that case the intervention might have  
13 benefited from support for the intended behaviour changes via changes in the environment.  
14 This explanation is supported by data from similar interventions in a primary care setting [6-8,  
15 47] that also failed to positively change health behaviour. For instance, an intervention study  
16 in a Dutch primary care setting reported a significant difference between the groups only for  
17 physical activity and fibre intake [6].

18  
19  
20  
21  
22  
23  
24  
25  
26  
27  
28  
29  
30  
31  
32  
33  
34  
35  
36  
37  
38 Thirdly, although we purposefully invested in culturally targeting the intervention, the  
39 intervention as implemented may not have met the needs of our specific population. Cultural  
40 targeting was based on an analysis of the determinants of diet and physical activity in our  
41 study population; this led to the incorporation of both surface and deep structure elements in  
42 the intervention [22]. The process evaluation revealed that the majority of participants who  
43 attended the intervention perceived the materials as clear and attractive, and agreed that the  
44 advice given within the intervention matched their lifestyle (unpublished data). Moreover,  
45 although it was a challenge to motivate respondents to participate in the family meeting,  
46 cooking classes or the exercise programme, those who attended were enthusiastic. However,  
47  
48  
49  
50  
51  
52  
53  
54  
55  
56  
57  
58  
59  
60

1  
2  
3 these latter views may differ from those who did not participate and those who dropped-out.  
4  
5 Therefore, the positive experiences do not exclude the possibility that incorporating different  
6  
7 culturally-targeted elements in the intervention might have led to an effective intervention.  
8  
9 More studies are needed to elucidate the specific elements which make cultural targeting  
10  
11 effective in this population [46].  
12  
13

### 14 15 16 **Conclusions**

17  
18 In this group of South Asians (aged 18-60 years) at risk of diabetes, a culturally-targeted  
19  
20 lifestyle intervention was not effective in promoting healthy behaviour. At 2-year follow-up  
21  
22 the changes in dietary behaviour, physical activity or underlying social-cognitive determinants  
23  
24 in the intervention group did not differ from those in the control group. Given the high *a*  
25  
26 *priori* risk and the specific characteristics of the target population, we recommend further  
27  
28 research to determine whether an updated strategy, preferably more accessible for the target  
29  
30 population, may change health behaviours through changes in the underlying social-cognitive  
31  
32 determinants (e.g. social norms and self-efficacy) in this high-risk South Asian population.  
33  
34  
35  
36  
37  
38  
39  
40  
41  
42  
43  
44  
45  
46  
47  
48  
49  
50  
51  
52  
53  
54  
55  
56  
57  
58  
59  
60

**Authors' contributions**

EV and IV analyzed the data. EV contributed to the interpretation, and drafted the first version of the manuscript. IV and KS designed the study, contributed to the interpretation of the data, and edited the manuscript. VN, BM and MN gave advice for the design and interpretation. WB contributed to the analysis and interpretation. All authors reviewed the manuscript and approved the final version.

**Funding statement**

This study was funded by the Netherlands Organisation for Health Research and Development (ZonMw) (grant no.120620023).

**Competing interests**

All authors declare that they have no competing interests.

**Data Sharing**

No additional data supporting the present paper are available online. Data collected during the study, as described in doi: 10.1186/1471-2458-12-371 , after a collaboration agreement is signed. Researchers may contact i.g.vanvalkengoed@amc.nl or k.stronks@amc.nl.



## REFERENCES

1. Zimmet PZ. Primary prevention of diabetes mellitus. *Diabetes Care*. 1988; 11:258-262
2. Roumen C, Corpeleijn E, Feskens EJ, Mensink M, Saris WH, Blaak EE. Impact of 3-year lifestyle intervention on postprandial glucose metabolism: the SLIM study. *Diabet Med*. 2008; 25:597-605
3. Knowler WC, Barrett-Connor E, Fowler SE, et al. Reduction in the incidence of type 2 diabetes with lifestyle intervention or metformin. *N Engl J Med*. 2002; 346:393-403
4. Tuomilehto J, Lindstrom J, Eriksson JG, et al. Prevention of type 2 diabetes mellitus by changes in lifestyle among subjects with impaired glucose tolerance. *N Engl J Med*. 2001; 344:1343-1350
5. Ramachandran A, Snehalatha C, Mary S, Mukesh B, Bhaskar AD, Vijay V. The Indian Diabetes Prevention Programme shows that lifestyle modification and metformin prevent type 2 diabetes in Asian Indian subjects with impaired glucose tolerance (IDPP-1). *Diabetologia*. 2006; 49:289-297
6. Vermunt PW, Milder IE, Wielaard F, de Vries JH, van Oers HA, Westert GP. Lifestyle counseling for type 2 diabetes risk reduction in Dutch primary care: results of the APHRODITE study after 0.5 and 1.5 years. *Diabetes Care*. 2011; 34:1919-1925
7. Kontogianni MD, Liatis S, Grammatikou S, Perrea D, Katsilambros N, Makrilakis K. Changes in dietary habits and their association with metabolic markers after a non-intensive, community-based lifestyle intervention to prevent type 2 diabetes, in Greece. The DEPLAN study. *Diabetes Res Clin Pract*. 2012; 95:207-214
8. Kujala UM, Jokelainen J, Oksa H, et al. Increase in physical activity and cardiometabolic risk profile change during lifestyle intervention in primary healthcare: 1-year follow-up study among individuals at high risk for type 2 diabetes. *BMJ Open*. 2011; 1:e000292. doi:10.1136/bmjopen-2011-000292
9. Wild S, Roglic G, Green A, Sicree R, King H. Global prevalence of diabetes: estimates for the year 2000 and projections for 2030. *Diabetes Care*. 2004; 27: 1047-1053
10. Kanaya AM, Wassel CL, Mathur D, Stewart A, Herrington D, Budoff MJ et al.. Prevalence and correlates of diabetes in South Asian Indians in the United States: findings from the metabolic syndrome and atherosclerosis in South asians living in America study and the multi-ethnic study of atherosclerosis. *Metab Syndr Relat Disord*. 2010; 8: 157-164
11. Gholap N, Davies M, Patel K, Sattar N, Khunti K. Type 2 diabetes and cardiovascular disease in South Asians. *Prim Care Diabetes*. 2011; 5: 45-56
12. Bindraban NR, van Valkengoed IG, Mairuhu G, et al. Prevalence of diabetes mellitus and the performance of a risk score among Hindustani Surinamese, African Surinamese and ethnic Dutch: a cross-sectional population-based study. *BMC Public Health*. 2008; 8: 271
13. Misra A, Ganda OP. Migration and its impact on adiposity and type 2 diabetes. *Nutrition*. 2007; 23:696-708
14. Admiraal W, Vlaar L, Nierkens V, et al. Intensive lifestyle intervention in general practice to prevent type 2 diabetes among 18 to 60-year-old South Asians: 1-year effects on the weight status and metabolic profile of participants in a randomized controlled trial. *Plos One* 2013;8:e68605

15. Bhopal RS, Douglas A, Wallia S, Forbes JF, Lean ME, Gill JM, McKnight JA, Sattar N, Sheikh A, Wild SH, Tuomilehto J, Sharma A, Bhopal R, Smith JB, Butcher I, Murray GD. Effect of a lifestyle intervention on weight change in south Asian individuals in the UK at high risk of type 2 diabetes: a family-cluster randomised controlled trial. *Lancet Diabetes Endocrinol* 2014;2:218-27
16. Weber MB, Oza-Frank R, Staimez LR, Ali MK, Narayan KM. Type 2 diabetes in Asians: prevalence, risk factors, and effectiveness of behavioral intervention at individual and population levels. *Annu Rev Nutr*. 2012; 32:417-439
17. Rosenstock IM. The health belief model and nutrition education. *J Can Diet Assoc*. 1982; 43: 184-192
18. Ajzen I. The theory of planned behaviour: reactions and reflections. *Psychol Health*. 2011; 26: 1113-1127
19. Prochaska JO, Johnson S, Lee P, et al. The transtheoretical model of behavior change. *The handbook of health behavior change*. 2 edition New York: Springer Publishing Co, 59-84, 1998
20. Vlaar EM, van Valkengoed IG, Nierkens V, Nicolaou M, Middelkoop BJ, Stronks K. Feasibility and effectiveness of a targeted diabetes prevention program for 18 to 60-year-old South Asian migrants: design and methods of the DH!AAN study. *BMC Public Health*. 2012; 12:371
21. Choenni C, Harmsen C. Place of birth and ethnic composition of the Surinamese in the Netherlands in Dutch. *Bevolkingstrends*. 2007; 1: 74-78
22. Nicolaou M, Vlaar EMA, van Valkengoed IG, Middelkoop BJ, Stronks K, Nierkens V.. Development of a diabetes prevention program for Surinamese South Asians in the Netherlands. *Health Promotion International* 2013;29:680-91
23. Mensink M, Feskens EJM, Saris WHM, de Bruin TW, Blaak EE:. Study on Lifestyle Intervention and Impaired Glucose Tolerance Maastricht (SLIM): design and screening results. *Diabetes Res Clin Pract*. 2003; 61:49-58
24. Bartholomew LK, Parcel GS, Kok G, Gottlieb NH, Fernandez M. Planning health promotion programs. An intervention mapping approach. 3th ed San Francisco, CA: Jossey-Bass, 19, 171-306, 2011
25. Health Council of the Netherlands. Guidelines for a healthy diet: the ecological perspective. The Hague: Health Council of the Netherlands. 2011
26. Kemper HCG, Ooijendijk WTM, Stiggelbout M. Concensus over de Nederlandse norm voor gezond bewegen. *Tijdschrift voor Gezondheidswetenschappen (TSG)*. 2000; 78: 180-183
27. Resnicow K, McMaster F. Motivational Interviewing: moving from why to how with autonomy support. *Int J Behav Nutr Phys Act*. 9:19
28. Hosper K, Deutekom M, Stronks PK. The effectiveness of "Exercise on Prescription" in stimulating physical activity among women in ethnic minority groups in the Netherlands: protocol for a randomized controlled trial. *BMC Public Health*. 2008; 8:406
29. Schmidt M, Absalah S, Nierkens V, Stronks K. Which factors engage women in deprived neighbourhoods to participate in exercise referral schemes? *BMC Public Health*. 2008; 8:371

- 1  
2  
3 30. Gademan MGJ, Deutekom M, Hosper K, Stronks K. The effect of exercise on prescription  
4 on physical activity and wellbeing in a multi-ethnic female population: A controlled trial.  
5 BMC Public Health. 2012; 12:758  
6
- 7 31. Matthews DR, Hosker JP, Rudenski AS, Naylor BA, Treacher DF, Turner RC.  
8 Homeostasis model assessment: insulin resistance and beta-cell function from fasting  
9 plasma glucose and insulin concentrations in man. Diabetologia. 1985; 28:412-419  
10
- 11 32. Vlaar EMA, Nierkens V, Nicolaou M, Middelkoop BJ, Stronks K, van Valkengoed IG.  
12 Risk perception is not associated with attendance at a preventive intervention for type 2  
13 diabetes mellitus among South Asians at risk of diabetes. Publ Health Nutrition  
14 2014;18:1109-18  
15
- 16 33. Wendel-Vos GC, Schuit AJ, Saris WH, Kromhout D. Reproducibility and relative validity  
17 of the short questionnaire to assess health-enhancing physical activity. J Clin Epidemiol.  
18 2003; 56:1163-1169  
19
- 20 34. de Munter JS, van Valkengoed IG, Agyemang C, Kunst AE, Stronks K. Large ethnic  
21 variations in recommended physical activity according to activity domains in amsterdam,  
22 the Netherlands. Int J Behav Nutr Phys Act. 2010; 7:85  
23
- 24 35. Leventhal H, Kelly K, Leventhal EA. Population risk, actual risk, perceived risk, and  
25 cancer control: a discussion. J Natl Cancer Inst Monogr. 1999; 81-85  
26
- 27 36. Lindstrom J, Tuomilehto J. The diabetes risk score: a practical tool to predict type 2  
28 diabetes risk. Diabetes Care. 2003; 26: 725-731  
29
- 30 37. Claassen L, Henneman L, van der Weijden T, Marteau TM, Timmermans DR. Being at  
31 risk for cardiovascular disease: perceptions and preventive behavior in people with and  
32 without a known genetic predisposition. Psychol Health Med. 2012; 17: 511-521  
33
- 34 38. Shephard RJ. Limits to the measurement of habitual physical activity by questionnaires.  
35 Br J Sports Med. 2003; 37:197-206  
36
- 37 39. Kremers SP, Visscher TL, Seidell JC, van Mechelen W, Brug J. Cognitive determinants of  
38 energy balance-related behaviours: measurement issues. Sports Med. 2005; 35:923-933  
39
- 40 40. Verschuren P, Doorewaard H. Designing a research project. 1 edition Utrecht, The  
41 Netherlands: Lemma, 125-169, 2005  
42
- 43 41. Balk EM, Earley A, Raman G, Avendano EA, Pittas AG, Remington RL. Combined Diet  
44 and Physical Activity Promotion Programs to Prevent Type 2 Diabetes Among Persons at  
45 Increased Risk: A Systematic Review for the Community Preventive Services Task Force.  
46 Ann Int Med 2015;163:437-451  
47
- 48 42. Treserras MA, Balady GJ. Resistance training in the treatment of diabetes and obesity:  
49 mechanisms and outcomes. J Cardiopulm Rehabil Prev 2009;29:67-75  
50
- 51 43. Brug J, van Lenthe, F. Environmental determinants and interventions for physical activity,  
52 nutrition and smoking: A review. Netherlands Organisation for Health Research and  
53 Development (ZonMw): 2005  
54
- 55 44. Romon M, Lommez A, Tafflet M, et al. Downward trends in the prevalence of childhood  
56 overweight in the setting of 12-year school- and community-based programmes. Public  
57 Health Nutrition. 12, 1735-1742  
58  
59  
60

- 1  
2  
3 45. Aziz Z, Absetz P, Oldroyd J, Pronk NP, Oldenburg B. A systematic review of real-world  
4 diabetes prevention programs: learning from the past 15 years. *Implementation Science*  
5 2015;10:172  
6  
7  
8 46. Nierkens V, Hartman MA, Nicolaou M, Vissenberg C, Beune EJ, Hosper K, van  
9 Valkengoed IG, Stronks K. Effectiveness of cultural adaptations of interventions aimed at  
10 smoking cessation, diet, and/or physical activity in ethnic minorities. a systematic review.  
11 *PLoS One* 2013;8:e73373  
12  
13  
14  
15  
16  
17  
18  
19  
20  
21  
22  
23  
24  
25  
26  
27  
28  
29  
30  
31  
32  
33  
34  
35  
36  
37  
38  
39  
40  
41  
42  
43  
44  
45  
46  
47  
48  
49  
50  
51  
52  
53  
54  
55  
56  
57  
58  
59  
60

For peer review only

**Table 1. Baseline characteristics of participants with a measurement of physical activity and diet at baseline and at 2-year follow-up measurement**

|                                    | <b>Intervention group,</b> | <b>Control group,</b> | <b>P-value</b> |
|------------------------------------|----------------------------|-----------------------|----------------|
|                                    | <b>N=165</b>               | <b>N=149</b>          |                |
| <b>Male</b>                        | 75 (45.5)                  | 77 (52.0)             | 0.245          |
| <b>Mean age (years)</b>            | 44.9 (0.87)                | 44.7 (0.84)           | 0.970          |
| <b>Low education</b>               | 16 (10.1)                  | 20 (13.8)             | 0.315          |
| <b>Family history of diabetes</b>  | 124 (77.5)                 | 103 (71.5)            | 0.232          |
| <b>Mean body mass index</b>        | 27.7 (0.32)                | 27.2 (0.30)           | 0.200          |
| <b>Mean fasting plasma glucose</b> | 5.3 (0.05)                 | 5.3 (0.04)            | 0.109          |
| <b>Mean 2-h post-load glucose</b>  | 6.1 (0.13)                 | 6.0 (0.15)            | 0.368          |
| <b>Mean glycated haemoglobin</b>   | 5.7 (0.03)                 | 5.7 (0.03)            | 0.883          |
| <b>Median HOMA-IR</b>              | 3.0 (2.2-4.1)              | 2.8 (2.1-3.9)         | 0.499          |

Data are presented as means (standard error), median (25th-75th percentile) or *n* (percentages); HOMA-IR, Homeostasis Model of Assessment-Insulin Resistance

Table 2. Effectiveness of intervention on physical activity and dietary behaviour among South Asians at risk of diabetes

|                                                      | Intervention group, N=165 |                          |              | Control group, N=149 |                           |             | p-value <sup>b</sup> |
|------------------------------------------------------|---------------------------|--------------------------|--------------|----------------------|---------------------------|-------------|----------------------|
|                                                      | At T0                     | ChangeT0-T1 <sup>a</sup> | Change T0-T2 | At T0                | Change T0-T1 <sup>a</sup> | ChangeT0-T2 |                      |
| <i>Physical activity</i>                             |                           |                          |              |                      |                           |             |                      |
| <b>Any moderate-to-vigorous activity</b>             | 135 (81.8)                |                          |              | 118 (79.2)           |                           |             |                      |
| -Participants with positive change (%)               |                           | 22 (17.1)                | 20 (13.4)    |                      | 18 (14.9)                 | 21 (12.7)   | 0.630                |
| -Participants with negative change (%)               |                           | 9 (7)                    | 10 (6.7)     |                      | 11 (9.1)                  | 16 (9.7)    |                      |
| <b>Mean moderate-to-vigorous activity (min/week)</b> | 628.0 (62.7)              |                          |              | 665.6 (72.0)         |                           |             |                      |
| -Changes                                             |                           | 163.1 (71.6)             | 142.9 (74.9) |                      | -34.3 (78.4)              | 0.5 (75.8)  | 0.672                |
| <b>Mean total activity (min/week)</b>                | 2698.8 (83.4)             |                          |              | 2451.3 (95.5)        |                           |             |                      |
| -Changes                                             |                           | 83.1 (83.4)              | -9.3 (84.8)  |                      | -174.8 (105.2)            | 2.9 (101.4) | 0.297                |
| <i>Dietary intake<sup>c</sup></i>                    |                           |                          |              |                      |                           |             |                      |
| <b>Fruit: 2 pieces /day (%)</b>                      | 71 (43.3)                 |                          |              | 55 (36.9)            |                           |             | 0.680                |
| -Participants with positive change (%)               |                           | 20 (15.9)                | 28 (17.1)    |                      | 16 (13.3)                 | 30 (20.3)   |                      |
| -Participants with negative change (%)               |                           | 21 (16.7)                | 19 (11.6)    |                      | 13 (10.8)                 | 14 (9.5)    |                      |

|                                                         |            |           |                        |           |           |       |
|---------------------------------------------------------|------------|-----------|------------------------|-----------|-----------|-------|
| <b>Vegetables: 200 g/day (%)</b>                        | 112 (67.9) |           | 48 (56.4) <sup>d</sup> |           | 0.787     |       |
| -Participants with positive change (%)                  | 12 (9.3)   | 20 (12.1) |                        | 19 (15.8) | 19 (12.8) |       |
| -Participants with negative change (%)                  | 17 (13.2)  | 17 (10.3) |                        | 14 (11.7) | 12 (8.1)  |       |
| <b>Whole wheat: almost exclusively (%)</b>              | 11 (6.7)   |           | 11 (7.4)               |           | 0.667     |       |
| -Participants with positive change (%)                  | 8 (6.2)    | 25 (15.2) |                        | 14 (11.7) | 20 (13.4) |       |
| -Participants with negative change (%)                  | 7 (5.4)    | 7 (4.2)   |                        | 11 (9.2)  | 4 (2.7)   |       |
| <b>Meal pattern: 3 meals/day at a regular times (%)</b> | 94 (57.3)  |           | 82 (55.4)              |           | 0.329     |       |
| -Participants with positive change (%)                  | 22 (17.3)  | 32 (19.5) |                        | 19 (16.0) | 26 (17.6) |       |
| -Participants with negative change (%)                  | 12 (9.4)   | 11 (6.7)  |                        | 7 (5.9)   | 17 (11.5) |       |
| <b>Brown rice: almost exclusively (%)</b>               | 21 (12.8)  |           | 11 (7.4)               |           |           |       |
| -Participants with positive change (%)                  | 10 (7.8)   | 12 (7.3)  |                        | 6 (5.0)   | 19 (12.8) | 0.264 |
| -Participants with negative change (%)                  | 7 (5.5)    | 6 (3.7)   |                        | 5 (4.3)   | 6 (4.0)   |       |

Data at T0 are presented as mean change (standard error) or n (percentages), changes from T0-T1 and T0-T2 are described as means (standard error) or number (percentage) with a positive change (e.g. from non-adherent to adherent to the guideline for fruit intake) or a negative change (e.g. from a regular to an irregular meal pattern) at one and two years.

1  
2  
3  
4  
5 <sup>a</sup> Of the 314 participants with a measurement at baseline and at 2-year follow-up, 279 also attended the measurement at 1-year follow-up (148 in the  
6 intervention group and 131 in the control group); <sup>b</sup> *P*-value for the intention-to-treat analysis of the difference in changes from T0 to T2 between the two  
7 groups; <sup>c</sup> Derived from the national guidelines for diet (30), with the exception of rice for which no guideline has been established; <sup>d</sup> significant difference  
8 between the groups at T0; T0, baseline measurement; T1, measurement after 1 year; T2, measurement after 2 years.  
9  
10  
11  
12  
13  
14  
15  
16  
17  
18  
19  
20  
21  
22  
23  
24  
25  
26  
27  
28  
29  
30  
31  
32  
33  
34  
35  
36  
37  
38  
39  
40  
41  
42  
43  
44  
45  
46  
47  
48  
49



Table 3. Effectiveness of intervention on determinants of behaviour among South Asians at risk of diabetes (n=314)

|                        |                                                                       | Intervention group, N=165 |                              |                  | Control group, N=149 |                              |             |                          |
|------------------------|-----------------------------------------------------------------------|---------------------------|------------------------------|------------------|----------------------|------------------------------|-------------|--------------------------|
|                        |                                                                       | At T0                     | ChangeT<br>0-T1 <sup>a</sup> | Change T0-<br>T2 | At T0                | Change<br>T0-T1 <sup>a</sup> | ChangeT0-T2 | p-<br>value <sup>b</sup> |
| <i>Risk perception</i> | <i>Causal beliefs</i>                                                 |                           |                              |                  |                      |                              |             |                          |
|                        | <b>Perceiving 6 general risk factors as<br/>cause (%)<sup>c</sup></b> | 110 (66.7)                |                              |                  | 103 (69.1)           |                              |             |                          |
|                        | -Participants with positive change (%)                                |                           | 20 (15.5)                    | 32 (19.4)        |                      | 24 (19.8)                    | 33 (22.1)   | 0.818                    |
|                        | -Participants with negative change (%)                                |                           | 16 (12.4)                    | 16 (9.7)         |                      | 12 (9.9)                     | 13 (8.7)    |                          |
|                        | <b>Perceiving consuming a lot of sugar as<br/>cause (%)</b>           | 113 (68.5)                |                              |                  | 105 (70.5)           |                              |             |                          |
|                        | -Participants with positive change (%)                                |                           | 18 (14.1)                    | 21 (12.7)        |                      | 16 (13.2)                    | 18 (12.1)   | 0.458                    |
|                        | -Participants with negative change (%)                                |                           | 32 (25.0)                    | 34 (20.6)        |                      | 16 (13.2)                    | 23 (15.4)   |                          |
|                        | <b>Perceiving consuming a lot of white<br/>rice as cause (%)</b>      | 95 (57.6)                 |                              |                  | 86 (57.7)            |                              |             |                          |
|                        | -Participants with positive change (%)                                |                           | 25 (19.4)                    | 35 (21.2)        |                      | 33 (27.3)                    | 39 (26.2)   | 0.552                    |
|                        | -Participants with negative change (%)                                |                           | 18 (14.0)                    | 21 (12.7)        |                      | 10 (8.3)                     | 16 (10.7)   |                          |

|                                                           |            |           |            |           |           |       |
|-----------------------------------------------------------|------------|-----------|------------|-----------|-----------|-------|
| <b>Perceiving consuming masala as cause<sup>d</sup></b>   | 49 (29.9)  |           | 48 (32.4)  |           |           |       |
| -Participants with positive change (%)                    | 11 (8.7)   | 22 (13.4) |            | 17 (14.0) | 19 (12.8) | 0.569 |
| -Participants with negative change (%)                    | 27 (21.3)  | 29 (17.7) |            | 17 (14.0) | 20 (13.5) |       |
| <b>Perceiving being a South Asian as cause</b>            | 122 (73.9) |           | 104 (69.8) |           |           |       |
| -Participants with positive change (%)                    | 19 (14.7)  | 24 (14.5) |            | 18 (14.9) | 30 (20.1) | 0.395 |
| -Participants with negative change (%)                    | 13 (10.1)  | 15 (9.1)  |            | 12 (9.9)  | 11 (7.4)  |       |
| <b>Perceiving having a family history of T2D as cause</b> | 150 (90.9) |           | 134 (89.9) |           |           |       |
| -Participants with positive change (%)                    | 8 (6.2)    | 12 (7.3)  |            | 10 (8.3)  | 12 (8.1)  | 0.798 |
| -Participants with negative change (%)                    | 9 (7.0)    | 13 (7.9)  |            | 4 (3.3)   | 9 (6.0)   |       |
| <b>High susceptibility</b>                                | 63 (38.2)  |           | 71 (47.7)  |           |           |       |
| -Participants with positive change (%)                    | 24 (18.6)  | 37 (22.4) |            | 28 (23.1) | 32 (21.5) | 0.941 |
| -Participants with negative change (%)                    | 11 (8.5)   | 17 (10.3) |            | 17 (14.0) | 17 (11.4) |       |
| <b>High controllability belief by PA</b>                  | 146 (88.5) |           | 132 (88.6) |           |           |       |
| -Participants with positive change (%)                    | 5 (3.9)    | 15 (9.1)  |            | 8 (6.6)   | 12 (8.1)  | 0.619 |
| -Participants with negative change (%)                    | 7 (5.5)    | 9 (5.5)   |            | 8 (6.6)   | 5 (3.4)   |       |

| <i>Positive attitude</i> | <i>PA</i>                              |            |           |  |            |                            |
|--------------------------|----------------------------------------|------------|-----------|--|------------|----------------------------|
| <i>towards</i>           | <b>Direct</b>                          | 160 (97.0) |           |  | 143 (96.0) |                            |
|                          | -Participants with positive change (%) | 3 (2.4)    | 4 (2.4)   |  | 3 (2.5)    | 4 (2.7) 1.0 <sup>e</sup>   |
|                          | -Participants with negative change (%) | 2 (1.6)    | 0 (0.0)   |  | 1 (0.8)    | 0 (0.0)                    |
|                          | <b>Indirect</b>                        | 161 (97.6) |           |  | 142 (95.3) |                            |
|                          | -Participants with positive change (%) | 4 (3.1)    | 4 (2.4)   |  | 3 (2.5)    | 5 (3.4) 0.740 <sup>e</sup> |
|                          | -Participants with negative change (%) | 3 (2.3)    | 6 (3.6)   |  | 2 (1.7)    | 1 (0.7)                    |
|                          | <b>Diet</b>                            |            |           |  |            |                            |
|                          | <b>In general</b>                      | 161 (98.2) |           |  | 148 (99.3) |                            |
|                          | -Participants with positive change (%) | 2 (1.6)    | 2 (1.2)   |  | 1 (0.8)    | 1 (0.7) 1.0 <sup>e</sup>   |
|                          | -Participants with negative change (%) | 2 (1.6)    | 1 (0.6)   |  | 2 (1.7)    | 1 (0.7)                    |
|                          | <b>Importance brown rice</b>           | 76 (46.1)  |           |  | 62 (41.6)  |                            |
|                          | -Participants with positive change (%) | 34 (26.4)  | 40 (24.2) |  | 30 (24.8)  | 39 (26.2) 0.739            |
|                          | -Participants with negative change (%) | 13 (10.1)  | 16 (9.7)  |  | 16 (13.2)  | 11 (7.4)                   |
|                          | <b>Importance snacks<sup>d</sup></b>   | 51 (31.5)  |           |  | 39 (26.4)  |                            |
|                          | -Participants with positive change (%) | 18 (14.5)  | 20 (12.3) |  | 20 (16.8)  | 11 (7.4) 0.298             |
|                          | -Participants with negative change (%) | 25 (20.2)  | 31 (19.1) |  | 19 (16.0)  | 26 (17.6)                  |

|                                  |                                        |            |           |                        |           |           |       |
|----------------------------------|----------------------------------------|------------|-----------|------------------------|-----------|-----------|-------|
|                                  | <b>Enjoyment brown rice</b>            | 43 (27.0)  |           | 30 (20.5)              |           |           |       |
|                                  | -Participants with positive change (%) | 34 (27.6)  | 32 (20.4) |                        | 20 (17.2) | 27 (18.5) | 0.140 |
|                                  | -Participants with negative change (%) | 10 (8.1)   | 15 (9.6)  |                        | 7 (6.0)   | 6 (4.1)   |       |
|                                  | <b>Enjoyment snacks<sup>d</sup></b>    | 93 (58.1)  |           | 67 (45.6) <sup>f</sup> |           |           |       |
|                                  | -Participants with positive change (%) | 25 (20.5)  | 22 (13.9) |                        | 24 (20.3) | 19 (12.9) | 0.147 |
|                                  | -Participants with negative change (%) | 36 (29.5)  | 49 (31.0) |                        | 16 (13.6) | 32 (21.8) |       |
| <b>Perceiving social support</b> | <b>PA</b>                              |            |           |                        |           |           |       |
|                                  | <b>Partner</b>                         | 71 (43.0)  |           | 66 (44.3)              |           |           |       |
|                                  | -Participants with positive change (%) | 18 (14.2)  | 28 (17.0) |                        | 13 (10.7) | 22 (14.8) | 0.730 |
|                                  | -Participants with negative change (%) | 13 (10.2)  | 16 (9.7)  |                        | 11 (9.1)  | 12 (8.1)  |       |
|                                  | <b>Others</b>                          | 103 (62.4) |           | 99 (66.4)              |           |           |       |
|                                  | -Participants with positive change (%) | 26 (20.3)  | 30 (18.2) |                        | 19 (15.7) | 28 (18.8) | 0.205 |
|                                  | -Participants with negative change (%) | 18 (14.1)  | 15 (9.1)  |                        | 16 (13.2) | 23 (15.4) |       |
|                                  | <b>Diet</b>                            |            |           |                        |           |           |       |
|                                  | <b>In general</b>                      | 98 (59.8)  |           | 85 (57.0)              |           |           |       |
|                                  | -Participants with positive change (%) | 21 (16.5)  | 28 (17.1) |                        | 19 (16.1) | 27 (18.1) | 0.090 |
|                                  | -Participants with negative change (%) | 21 (15.5)  | 35 (21.3) |                        | 27 (22.9) | 18 (12.1) |       |

|                                      |                                        |               |           |            |           |           |
|--------------------------------------|----------------------------------------|---------------|-----------|------------|-----------|-----------|
|                                      | <b>Brown rice</b>                      | 44 (26.8)     |           | 41 (27.5)  |           |           |
|                                      | -Participants with positive change (%) | 28 (22.2)     | 26 (15.9) |            | 17 (14.4) | 31 (20.8) |
|                                      | -Participants with negative change (%) | 12 (9.5)      | 24 (14.6) |            | 22 (18.6) | 18 (12.1) |
|                                      | <b>Refusing snacks</b>                 | 48 (29.3)     |           | 45 (30.2)  |           |           |
|                                      | -Participants with positive change (%) | 30 (23.6)     | 37 (22.6) |            | 18 (15.1) | 37 (25.0) |
|                                      | -Participants with negative change (%) | 13 (10.2)     | 29 (17.7) |            | 25 (21.0) | 18 (12.2) |
| <b>Perceiving self-<br/>efficacy</b> | <b>PA</b>                              | 109<br>(66.1) |           | 103 (69.1) |           |           |
|                                      | -Participants with positive change (%) |               | 22 (17.2) | 28 (17.0)  |           | 25 (16.8) |
|                                      | -Participants with negative change (%) |               | 24 (18.8) | 19 (11.5)  |           | 16 (10.7) |
|                                      | <b>Diet</b>                            |               |           |            |           |           |
|                                      | <b>In general</b>                      | 151 (91.5)    |           | 136 (91.3) |           |           |
|                                      | -Participants with positive change (%) | 4 (3.1)       | 7 (4.2)   |            | 7 (5.8)   | 10 (6.7)  |
|                                      | -Participants with negative change (%) | 2 (1.6)       | 3 (1.8)   |            | 7 (5.8)   | 4 (2.7)   |
|                                      | <b>Brown rice</b>                      | 56 (33.9)     |           | 38 (25.5)  |           |           |
|                                      | -Participants with positive change (%) | 28 (21.7)     | 26 (15.9) |            | 29 (24.0) | 27 (18.1) |
|                                      | -Participants with negative change (%) | 22 (17.1)     | 20 (12.2) |            | 13 (10.7) | 14 (9.4)  |

|                         |                                        |            |           |            |           |                    |
|-------------------------|----------------------------------------|------------|-----------|------------|-----------|--------------------|
|                         | <b>Refusing snacks</b>                 | 98 (60.5)  |           | 101 (69.7) |           |                    |
|                         | -Participants with positive change (%) | 25 (20.0)  | 40 (24.8) | 25 (21.4)  | 27 (18.9) | 0.359              |
|                         | -Participants with negative change (%) | 11 (8.8)   | 15 (9.3)  | 14 (12.0)  | 18 (12.6) |                    |
| <b>Stage of change-</b> | <b>PA within 6 months</b>              | 99 (59.3)  |           | 105 (69.5) |           |                    |
| <b>motivated to</b>     | -Participants with positive change (%) | 26 (15.8)  | 33 (20.0) | 16 (10.7)  | 21 (14.1) | 0.076              |
| <b>change</b>           | -Participants with negative change (%) | 43 (26.1)  | 30 (18.2) | 44 (29.5)  | 18 (12.1) |                    |
|                         | <b>Diet within 6 months</b>            |            |           |            |           |                    |
|                         | <b>In general</b>                      | 153 (92.7) |           | 135 (90.6) |           |                    |
|                         | -Participants with positive change (%) | 7 (5.4)    | 7 (4.2)   | 8 (6.6)    | 10 (6.7)  | 0.334 <sup>e</sup> |
|                         | -Participants with negative change (%) | 1 (0.8)    | 3 (1.8)   | 4 (3.3)    | 4 (2.7)   |                    |
|                         | <b>Brown rice</b>                      | 82 (49.7)  |           | 59 (39.6)  |           |                    |
|                         | -Participants with positive change (%) | 22 (17.2)  | 21 (12.7) | 23 (19.0)  | 26 (17.4) | 0.266              |
|                         | -Participants with negative change (%) | 13 (10.2)  | 30 (18.2) | 17 (14.0)  | 19 (12.8) |                    |

Data at T0 are presented as mean change (standard error) or n (percentages), changes from T0-T1 and T0-T2 are described as means (standard error) or number (percentage) with a positive change (e.g. from non-adherent to adherent to the guideline for fruit intake) or a negative change (e.g. from a regular to an irregular meal pattern) at one and two years. <sup>a</sup> Of the 314 participants with a measurement at baseline and after two years, 279 also attended the measurement at year 1 (148 in the intervention group and 131 in the control group); <sup>b</sup> *P*-value for the intention-to-treat analysis of the difference in changes from T0 to T2 between the intervention and control group; <sup>c</sup> Six common risk factors: overweight, too little exercise, unhealthy diet, age  $\geq$  35 years, smoking, and hypertension; <sup>d</sup> Except for the belief that masala intake is a possible cause of diabetes and the attitude towards refusing snacks at parties, an increase or positive change in the items measuring the determinants of behaviour change was expected to positively influence behaviour change; <sup>e</sup> Because of low

1  
2  
3  
4  
5 expected counts, a Fisher's exact test or chi-square test was done comparing the category positive change versus the rest; <sup>f</sup> Significant difference between the  
6 groups at T0; T0, baseline measurement; T1, measurement after 1 year; T2, measurement after 2 years; T2D, Type 2 diabetes mellitus; PA, physical activity.  
7  
8  
9  
10  
11  
12  
13  
14  
15  
16  
17  
18  
19  
20  
21  
22  
23  
24  
25  
26  
27  
28  
29  
30  
31  
32  
33  
34  
35  
36  
37  
38  
39  
40  
41  
42  
43  
44  
45  
46  
47  
48  
49

For peer review only

1  
2  
3 **Figure 1.** Flow chart of inclusion of the study participants  
4  
5  
6

7 \*A fasting glucose of 5.5 mmol/L or lower, a 2-hour post-load glucose of 7.7 mmol/L or lower, a  
8 glycated haemoglobin level of 5.9% or lower and a value of 2.38 or lower for the homeostasis model  
9 assessment of estimated insulin resistance; \*\* a fasting glucose of 7.0 mmol/L or more, and/or a 2-  
10 hour post-load glucose of 11.1 mmol/L or more; RCT, randomized controlled trial; PA, physical  
11 activity; T0, baseline measurement; T2, measurement at 2-year follow-up  
12  
13  
14  
15  
16  
17  
18  
19  
20  
21  
22  
23  
24  
25  
26  
27  
28  
29  
30  
31  
32  
33  
34  
35  
36  
37  
38  
39  
40  
41  
42  
43  
44  
45  
46  
47  
48  
49  
50  
51  
52  
53  
54  
55  
56  
57  
58  
59  
60



Figure 1- Flow chart of the study

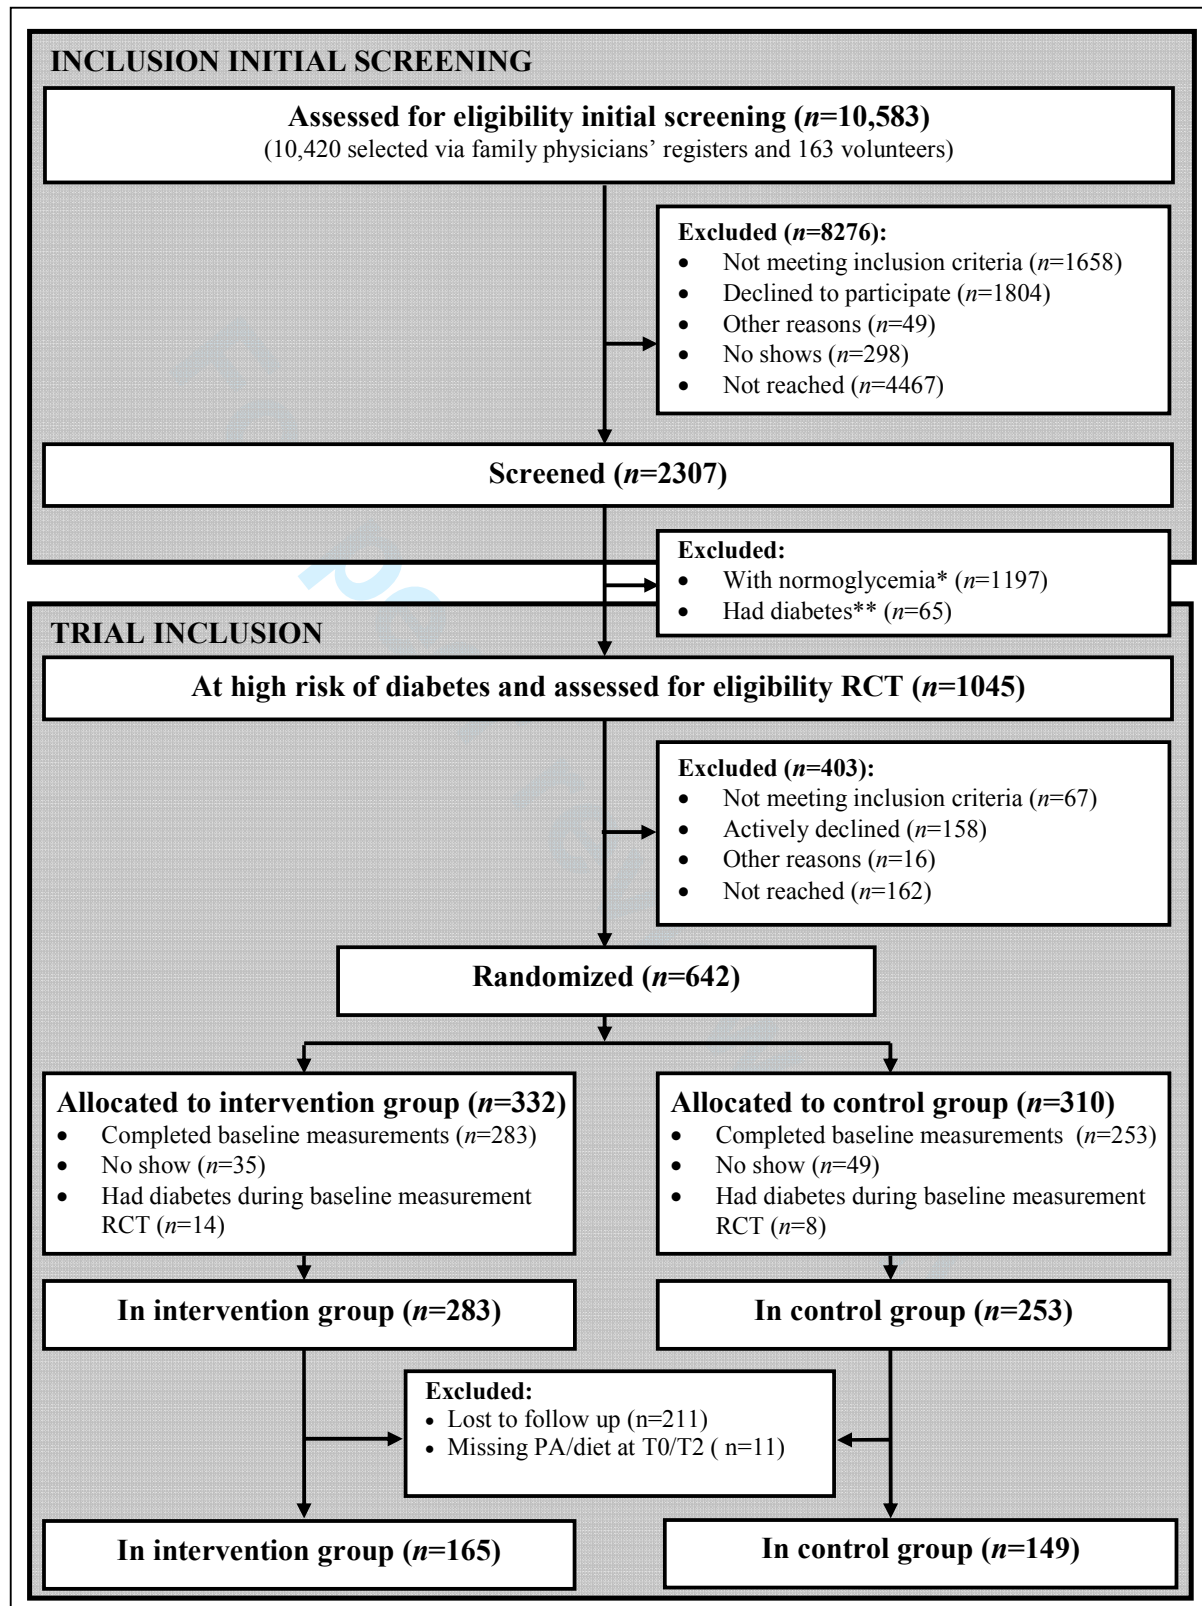

**SUPPLEMENT 1. Comparison of baseline characteristics, physical activity, dietary behaviour and motivational stage of participants in the present analysis and those who were excluded**

|                                                                               | <b>In present analysis</b> | <b>Excluded</b> | <b>p-value</b> |
|-------------------------------------------------------------------------------|----------------------------|-----------------|----------------|
|                                                                               | <b>(N=314)</b>             | <b>(N=222)</b>  |                |
| <b>Male</b>                                                                   | 152 (48.6)                 | 112 (50.5)      | 0.667          |
| <b>Mean age (years)</b>                                                       | 44.8 (0.6)                 | 41.6 (0.7)      | <b>0.001</b>   |
| <b>Low education</b>                                                          | 36 (11.8)                  | 25 (11.6)       | 0.925          |
| <b>Family history of diabetes</b>                                             | 227 (74.7)                 | 171 (78.4)      | 0.318          |
| <b>Mean body mass index</b>                                                   | 27.3 (0.3)                 | 27.4 (0.2)      | 0.889          |
| <b>Mean fasting plasma glucose</b>                                            | <b>5.3 (0.03)</b>          | 5.3 (0.04)      | 0.803          |
| <b>Mean 2-h post-load glucose</b>                                             | 6.0 (0.1)                  | 6.0 (0.1)       | 0.907          |
| <b>Mean glycated haemoglobin</b>                                              | 5.7 (0.02)                 | 5.6 (0.03)      | 0.092          |
| <b>Median HOMA-IR</b>                                                         | 3.0 (2.2-4.0)              | 3.2 (2.4-4.4)   | <b>0.048</b>   |
| <b>Mean total activity (min/week)</b>                                         | 2600.8 (64.6)              | 2663.6 (84.1)   | 0.490          |
| <b>Fruit: 2 pieces /day</b>                                                   | 126 (40.3)                 | 97 (46.2)       | 0.179          |
| <b>Vegetables: 200 g/day</b>                                                  | 196 (62.4)                 | 131 (62.4)      | 0.993          |
| <b>Whole wheat: almost exclusively</b>                                        | 22 (7.0)                   | 11 (5.2)        | 0.414          |
| <b>Meal pattern: 3 meals/day at regular times</b>                             | 176 (56.4)                 | 103 (49.0)      | 0.098          |
| <b>Brown rice: almost exclusively</b>                                         | 32 (10.2)                  | 24 (11.5)       | 0.649          |
| <b>Stage of change- motivated to change physical activity within 6 months</b> | 204 (65.0)                 | 148 (66.7)      | 0.683          |
| <b>Stage of change: motivated to change diet within 6 months</b>              | 288 (91.7)                 | 188 (90.0)      | 0.489          |

Data are presented as means (standard error), median (interquartile range) or *n* (percentage); HOMA-IR, Homeostasis Model of Assessment-Insulin Resistance.

### Checklist of Items for Reporting Trials of Nonpharmacologic Treatments\*

| Section                    | Item | Standard CONSORT Description                                                                                                                                                              | Extension for Nonpharmacologic Trials                                                                                                                                       | Reported on Page No.     |
|----------------------------|------|-------------------------------------------------------------------------------------------------------------------------------------------------------------------------------------------|-----------------------------------------------------------------------------------------------------------------------------------------------------------------------------|--------------------------|
| <b>Title and abstract†</b> | 1    | How participants were allocated to interventions (e.g., “random allocation,” “randomized,” or “randomly assigned”)                                                                        | In the abstract, description of the experimental treatment, comparator, care providers, centers, and blinding status                                                        | 1-2                      |
| <b>Introduction</b>        |      |                                                                                                                                                                                           |                                                                                                                                                                             |                          |
| Background                 | 2    | Scientific background and explanation of rationale                                                                                                                                        |                                                                                                                                                                             | 4                        |
| <b>Methods</b>             |      |                                                                                                                                                                                           |                                                                                                                                                                             |                          |
| Participants†              | 3    | Eligibility criteria for participants and the settings and locations where the data were collected                                                                                        | When applicable, eligibility criteria for centers and those performing the interventions                                                                                    | 6-7                      |
| Interventions†             | 4    | Precise details of the interventions intended for each group and how and when they were actually administered                                                                             | Precise details of both the experimental treatment and comparator                                                                                                           | 8-9                      |
|                            | 4A   |                                                                                                                                                                                           | Description of the different components of the interventions and, when applicable, descriptions of the procedure for tailoring the interventions to individual participants | 8-9                      |
|                            | 4B   |                                                                                                                                                                                           | Details of how the interventions were standardized                                                                                                                          | 8-9                      |
|                            | 4C   |                                                                                                                                                                                           | Details of how adherence of care providers with the protocol was assessed or enhanced                                                                                       | 8                        |
| Objectives                 | 5    | Specific objectives and hypotheses                                                                                                                                                        |                                                                                                                                                                             | 5                        |
| Outcomes                   | 6    | Clearly defined primary and secondary outcome measures and, when applicable, any methods used to enhance the quality of measurements (e.g., multiple observations, training of assessors) |                                                                                                                                                                             | 9-13                     |
| Sample size†               | 7    | How sample size was determined and, when applicable, explanation of any interim analyses and stopping rules                                                                               | When applicable, details of whether and how the clustering by care providers or centers was addressed                                                                       | Reference trial protocol |

|                                        |             |                                                                                                                                                                                                                                                                                                                                        |                                                                                                                                                              |                          |
|----------------------------------------|-------------|----------------------------------------------------------------------------------------------------------------------------------------------------------------------------------------------------------------------------------------------------------------------------------------------------------------------------------------|--------------------------------------------------------------------------------------------------------------------------------------------------------------|--------------------------|
| Randomization–<br>sequence generation† | 8           | Method used to generate the random allocation sequence, including details of any restriction (e.g., blocking, stratification)                                                                                                                                                                                                          | When applicable, how care providers were allocated to each trial group                                                                                       | 7                        |
| Allocation concealment                 | 9           | Method used to implement the random allocation sequence (e.g., numbered containers or central telephone), clarifying whether the sequence was concealed until interventions were assigned                                                                                                                                              |                                                                                                                                                              | 7                        |
| Implementation                         | 10          | Who generated the allocation sequence, who enrolled participants, and who assigned participants to their groups                                                                                                                                                                                                                        |                                                                                                                                                              | 7, references            |
| Blinding (masking)†                    | 11A         | Whether or not participants, those administering the interventions, and those assessing the outcomes were blinded to group assignment                                                                                                                                                                                                  | Whether or not those administering co-interventions were blinded to group assignment                                                                         | 7                        |
|                                        | 11B         |                                                                                                                                                                                                                                                                                                                                        | If blinded, method of blinding and description of the similarity of interventions†                                                                           |                          |
| Statistical methods†                   | 12          | Statistical methods used to compare groups for primary outcome(s); methods for additional analyses, such as subgroup analyses and adjusted analyses                                                                                                                                                                                    | When applicable, details of whether and how the clustering by care providers or centers was addressed                                                        | 14-15                    |
| <b>Results</b>                         |             |                                                                                                                                                                                                                                                                                                                                        |                                                                                                                                                              |                          |
| Participant flow†                      | 13          | Flow of participants through each stage (a diagram is strongly recommended)--- specifically, for each group, report the numbers of participants randomly assigned, receiving intended treatment, completing the study protocol, and analyzed for the primary outcome; describe deviations from study as planned, together with reasons | The number of care providers or centers performing the intervention in each group and the number of patients treated by each care provider or in each center | Figure 1, trial protocol |
| Implementation of<br>intervention†     | New<br>item |                                                                                                                                                                                                                                                                                                                                        | Details of the experimental treatment and comparator as they were implemented                                                                                | 16                       |
| Recruitment                            | 14          | Dates defining the periods of recruitment and follow-up                                                                                                                                                                                                                                                                                |                                                                                                                                                              | 6,14                     |
| Baseline data†                         | 15          | Baseline demographic and clinical characteristics of each group                                                                                                                                                                                                                                                                        | When applicable, a description of care providers (case volume, qualification, expertise, etc.) and centers (volume) in each group                            | Table1,<br>supplement 1  |

|                         |    |                                                                                                                                                                                                           |                                                                                                                                                                       |               |
|-------------------------|----|-----------------------------------------------------------------------------------------------------------------------------------------------------------------------------------------------------------|-----------------------------------------------------------------------------------------------------------------------------------------------------------------------|---------------|
| Numbers analyzed        | 16 | Number of participants (denominator) in each group included in each analysis and whether analysis was by “intention-to-treat”; state the results in absolute numbers when feasible (e.g., 10/20, not 50%) |                                                                                                                                                                       | 13            |
| Outcomes and estimation | 17 | For each primary and secondary outcome, a summary of results for each group and the estimated effect size and its precision (e.g., 95% confidence interval)                                               |                                                                                                                                                                       | 16,17, tables |
| Ancillary analyses      | 18 | Address multiplicity by reporting any other analyses performed, including subgroup analyses and adjusted analyses, indicating those prespecified and those exploratory                                    |                                                                                                                                                                       | 15            |
| Adverse events          | 19 | All important adverse events or side effects in each intervention group                                                                                                                                   |                                                                                                                                                                       | na            |
| <b>Discussion</b>       |    |                                                                                                                                                                                                           |                                                                                                                                                                       |               |
| Interpretation†         | 20 | Interpretation of the results, taking into account study hypotheses, sources of potential bias or imprecision, and the dangers associated with multiplicity of analyses and outcomes                      | In addition, take into account the choice of the comparator, lack of or partial blinding, and unequal expertise of care providers or centers in each group            | 18-19         |
| Generalizability†       | 21 | Generalizability (external validity) of the trial findings                                                                                                                                                | Generalizability (external validity) of the trial findings according to the intervention, comparators, patients, and care providers and centers involved in the trial | 18,21         |
| Overall evidence        | 22 | General interpretation of the results in the context of current evidence                                                                                                                                  |                                                                                                                                                                       | 22            |

\*Additions or modifications to the CONSORT checklist. CONSORT = Consolidated Standards of Reporting Trials.

†This item was modified in the 2007 revised version of the CONSORT checklist.

# BMJ Open

## EFFECTIVENESS OF A TARGETED LIFESTYLE INTERVENTION IN PRIMARY CARE ON DIET AND PHYSICAL ACTIVITY AMONG SOUTH ASIANS AT RISK OF DIABETES: 2-YEAR RESULTS OF A RANDOMISED CONTROLLED TRIAL IN THE NETHERLANDS

|                                    |                                                                                                                                                                                                                                                                                                                                                                                                                                                                                                             |
|------------------------------------|-------------------------------------------------------------------------------------------------------------------------------------------------------------------------------------------------------------------------------------------------------------------------------------------------------------------------------------------------------------------------------------------------------------------------------------------------------------------------------------------------------------|
| Journal:                           | <i>BMJ Open</i>                                                                                                                                                                                                                                                                                                                                                                                                                                                                                             |
| Manuscript ID                      | bmjopen-2016-012221.R1                                                                                                                                                                                                                                                                                                                                                                                                                                                                                      |
| Article Type:                      | Research                                                                                                                                                                                                                                                                                                                                                                                                                                                                                                    |
| Date Submitted by the Author:      | 12-Jul-2016                                                                                                                                                                                                                                                                                                                                                                                                                                                                                                 |
| Complete List of Authors:          | Vlaar, Everlina; AMC, Public Health; GGD Flevoland<br>Nierkens, Vera; AMC, Public Health; Leiden University Medical Center,<br>Public Health and Primary Health Care<br>Nicolaou, Mary; Academic Medical Centre, Public Health<br>Middelkoop, Barend; Leiden University Medical Centre, Public Health and<br>Primary Health Care<br>Busschers, Wim; AMC, Public Health<br>Stronks, Karien; Academic Medical Centre / University of Amsterdam,<br>Public Health<br>van Valkengoed, Irene; AMC, Public Health |
| <b>Primary Subject<br>Heading</b>: | Diabetes and endocrinology                                                                                                                                                                                                                                                                                                                                                                                                                                                                                  |
| Secondary Subject Heading:         | Nutrition and metabolism, General practice / Family practice                                                                                                                                                                                                                                                                                                                                                                                                                                                |
| Keywords:                          | type 2 diabetes, South Asians, diet, physical activity, intervention                                                                                                                                                                                                                                                                                                                                                                                                                                        |
|                                    |                                                                                                                                                                                                                                                                                                                                                                                                                                                                                                             |

SCHOLARONE™  
Manuscripts

1  
2  
3 **Effectiveness of a targeted lifestyle intervention in primary care on diet and physical**  
4 **activity among South Asians at risk of diabetes; 2-year results of a randomised**  
5 **controlled trial in the Netherlands**  
6  
7  
8  
9  
10  
11  
12  
13

14 E.M.A. Vlaar<sup>1,2</sup>, V. Nierkens<sup>1,3</sup>, M. Nicolaou<sup>1</sup>, B.J.C. Middelkoop<sup>3</sup>, W.B. Busschers<sup>1</sup>, K.  
15 Stronks<sup>1</sup>, I.G.M. van Valkengoed<sup>1</sup>  
16  
17  
18  
19

20  
21 <sup>1</sup> Department of Public Health, Academic Medical Center, Amsterdam, The Netherlands

22 <sup>2</sup> GGD Flevoland, Lelystad, The Netherlands (current affiliation)

23 <sup>3</sup> Department of Public Health and Primary Health Care, Leiden University Medical Center,  
24  
25  
26  
27 The Netherlands  
28  
29  
30  
31  
32  
33  
34  
35  
36  
37  
38  
39  
40

41 *Corresponding author:*

42 Irene G.M. van Valkengoed, Department of Public Health, Academic Medical Center,  
43  
44 University of Amsterdam, Meibergdreef 9, J2.209, 1105 AZ Amsterdam, The Netherlands

45  
46 Telephone: +31 (0)20 - 566 5342

47  
48 Fax: +31 (0)20 - 697 2316

49  
50 Email: i.g.vanvalkengoed@amc.nl  
51  
52  
53  
54  
55  
56  
57  
58  
59  
60

## ABSTRACT

**Objectives.** In South Asian populations, little is known about the effects of intensive interventions to reduce the risk of type 2 diabetes on health behaviour. We examined the effectiveness at 2 years of a culturally-targeted lifestyle intervention on diet, physical activity and determinants of behaviour change among South Asians at risk of diabetes.

**Design.** Randomised controlled trial with de facto masking

**Setting.** Primary care.

**Participants.** A total of 536 18-60 year old South Asians at risk of diabetes (i.e. with impaired glucose tolerance, impaired fasting glucose, or relatively high insulin resistance) were randomised to the intervention (n=283) or a control (n=253) group. Data of 314 participants (n= 165 intervention, n=149 control) were analysed.

**Interventions.** The culturally-targeted intervention consisted of individual counselling using motivational interviewing (6-8 sessions in the first 6 months plus 3-4 booster sessions), a family session, cooking classes, and a supervised physical activity programme. The control group received generic lifestyle advice.

**Outcome measures.** We compared changes in physical activity, diet and social-cognitive underlying determinants between the two groups at 2-year follow-up with independent sample t-tests, chi square tests and Fisher's exact tests.

**Results.** At 2-year follow-up participants in the intervention group were more moderately-to-vigorously active than at baseline but, compared with changes in the control group, the difference was not significant (change min/week 142.9 versus 0.5,  $p=0.672$ ). Also, no significant difference was found between the two groups in changes on any of the components of the diet or the social-cognitive determinants of diet and physical activity.

**Conclusions.** The culturally-targeted lifestyle intervention led to high drop-out and was not effective in promoting healthy behaviour among South Asians at risk of diabetes. Given the



1  
2  
3 high *a priori* risk, we recommend to develop new strategies, preferably more acceptable, to  
4  
5 promote healthy behaviour.  
6

7 **Trial registration:** NTR1499; [www.trialregister.nl/trialreg/admin/rctview.asp?TC=1499](http://www.trialregister.nl/trialreg/admin/rctview.asp?TC=1499)  
8  
9

### 10 11 **Strengths and limitations of this study** 12

- 13  
14 - The intensive intervention in this trial was culturally targeted, based on a needs  
15 assessment and formative research, to characteristics of South Asians living in the  
16 Netherlands.  
17
- 18  
19 - This study reports on physical activity, diet as well as the determinants of behaviour  
20 change, thus contributing to the yet limited knowledge about the effects of intensive  
21 interventions on behavioural measures among South Asians.  
22
- 23  
24 - Low participation and high drop-out from the trial may indicate poor acceptability of  
25 the intervention, and may have led to a biased estimate of intervention effects.  
26
- 27  
28 - We assessed the intervention effects on health behaviours with self-reported measures,  
29 which may be influenced by various reporting biases.  
30  
31  
32  
33  
34  
35  
36  
37  
38  
39  
40  
41  
42  
43  
44  
45  
46  
47  
48  
49  
50  
51  
52  
53  
54  
55  
56  
57  
58  
59  
60

## BACKGROUND

Diet and physical activity are key modifiable risk factors for type 2 diabetes mellitus (T2D), and interventions targeting these behaviours can help to prevent or postpone this disease [1-5]. Efficacy trials have shown that, in high-risk individuals, the onset of T2D may be prevented or postponed through individual diet counselling and physical activity guidance through reduction in weight and waist circumference [2-5]. Trials in a standard care setting aimed at promoting a healthy diet and physical activity have yielded similar, albeit more modest, results [6-8].

South Asian migrants and their offspring (hereafter referred to as 'South Asians') living in high-income countries are, in particular, at high risk for T2D [9-13]. Strategies targeting diet and physical activity have been implemented to reduce this increased risk among these populations. However, the trials evaluating intensive diet counselling and physical activity guidance in South Asian populations in the UK and in the Netherlands yielded only moderate results in terms of the reduction of weight and waist circumference [14-15].

One of the reasons for the moderate results could be that, in these trials, the interventions implemented do not lead to the intended changes in dietary behaviour and physical activity. However, little is known about the effects of intensive interventions on behavioural measures among South Asians [16]. These measures not only include dietary behaviour and physical activity, but also social-cognitive determinants (such as self-efficacy) as a result of which changes in these behaviours occur [17-19].

1  
2  
3 Therefore, the present study aims to analyse the effectiveness of an intervention among South  
4  
5 Asians living in the Netherlands aimed at preventing T2D, with regard to changes in dietary  
6  
7 habits, physical activity, and the social-cognitive determinants of behaviour change.  
8

9  
10 Whereas our earlier study described the effects of this intervention on weight and other  
11  
12 metabolic outcomes after one year [14], the effects on behavioural measures have not yet been  
13  
14 investigated. In this intervention, motivational interviewing and tailored risk information were  
15  
16 used to address social-cognitive factors underlying dietary behaviour and physical activity,  
17  
18 including risk perception, attitudes, social support, and self-efficacy. The intervention was  
19  
20 based on a needs assessment and formative research, and targeted to characteristics of South  
21  
22 Asians Surinamese, who are the descendants of contract labourers who migrated to Surinam  
23  
24 mostly from North India.  
25  
26  
27  
28  
29  
30  
31  
32  
33  
34  
35  
36  
37  
38  
39  
40  
41  
42  
43  
44  
45  
46  
47  
48  
49  
50  
51  
52  
53  
54  
55  
56  
57  
58  
59  
60

## METHODS

### Study population

All those included in the present investigation were participants of the DHIAAN study: this is a randomised controlled trial (no. NTR1499) investigating the effectiveness of a culturally-targeted intensive lifestyle intervention to prevent T2D and cardiovascular risk factors among South Asian Surinamese in primary care [20]. The term South Asian Surinamese refers to people of South Asian ancestral origin and their offspring who migrated to the Netherlands via Suriname. The South Asian Surinamese are descendants of the labourers from North India (Uttar Pradesh, Uttaranchal, and West Bihar) who were indentured between 1873 and 1917. The two large migration waves of South Asian Surinamese to the Netherlands were caused mainly by the political situation in Suriname. The first wave took place at the time of the independence of Suriname in 1975 and the second wave (at the time of Desi Bouterse's coup) in February 1980 [21].

Details of the DHIAAN study, including changes to the original protocol, and the process of adapting the lifestyle intervention for the social-cultural and social-cognitive determinants of South Asian Surinamese, are already published [20,22]. In brief, 2307 South Asian Surinamese (aged 18-60 years) living in The Hague (the Netherlands), were screened via general practices between 18 May 2009 and 11 October 2010 (Fig. 1). To achieve a high response rate, a culturally-targeted intensive recruitment strategy was used that was proven feasible in the pilot of the DHIAAN study [20]. General practitioners (GPs) sent each potential participant an invitation, together with a reply card that could be returned if further contact was not wanted. Invitees who did not respond received a written reminder and were also contacted by telephone.

1  
2  
3 All potential participants were requested to fill out a brief questionnaire, undergo a physical  
4 examination, and provide a fasting blood sample. The 968 participants who were invited and  
5 screened between 18 May 2009 and 18 April 2010 also took an oral glucose tolerance test (75  
6 g). Thereafter, the oral glucose tolerance test was discontinued for practical reasons. Due to  
7 the shorter duration of a screening with a single measurement, a greater number of people  
8 could be screened within the extended recruitment period [20].  
9  
10  
11  
12  
13  
14  
15  
16  
17

### 18 **Inclusion in the trial**

19  
20 Screened participants with impaired fasting glucose (fasting glucose of 5.6-6.9 mmol/l),  
21 impaired glucose tolerance (2-hour post-load glucose of 7.8-11.0 mmol/l), a glycated  
22 haemoglobin (HbA1c) level of  $\geq 42$  mmol/mol, and/or a value of  $\geq 2.39$  for the homeostasis  
23 model assessment-insulin resistance (HOMA-IR) were invited to participate in the trial [20]  
24 (Fig. 1).  
25  
26  
27  
28  
29  
30  
31  
32  
33

34 Excluded was anyone who was already involved in a lifestyle programme, was pregnant, had  
35 a chronic disease that made participation in the intervention impossible, and/or used drugs  
36 that interfered with plasma glucose levels. Also excluded were participants with newly  
37 diagnosed T2D (i.e. a fasting glucose  $\geq 7.0$  mmol/l, a 2-h post-load glucose  $\geq 11.0$  mmol/l, or a  
38 HbA1c level  $\geq 48$  mmol/mol); these persons were referred to regular clinical care.  
39  
40  
41  
42  
43  
44  
45  
46

47 As described previously in more detail [14,20], 536 people were randomly assigned to either  
48 the intervention or the control group using a computer-generated randomisation list (simple  
49 randomisation). Family or household members, defined by postal code and house number,  
50 were assigned to the same group. Participants were informed about the procedures for the arm  
51  
52  
53  
54  
55  
56  
57  
58  
59  
60

1  
2  
3 of the trial that they were assigned to; the masking (de facto masking) of the two groups was  
4  
5 maintained throughout the trial.  
6  
7

8  
9 The study was approved by the Institutional Review Board of the Academic Medical Center,  
10  
11 Amsterdam. All participants provided both oral and written informed consent.  
12  
13

### 14 15 16 **Intervention group**

17  
18 All participants in the intervention group were offered a culturally-targeted lifestyle  
19  
20 intervention [22]. The design of this intervention was in line with the design of the proven  
21  
22 efficacious intervention used in the Study on Lifestyle Intervention and Impaired Glucose  
23  
24 Tolerance Maastricht (SLIM), which aimed to evaluate the effect of that intervention on  
25  
26 glucose tolerance in a European Dutch population [23]. In line with that and other  
27  
28 interventions in this field, the theoretical starting point of our intervention was the notion that  
29  
30 motivation for behaviour change is driven by personal determinants, including attitudes,  
31  
32 social influences and self-efficacy. In our intervention, we used the technique of motivational  
33  
34 interviewing to address these personal determinants [22]. In addition, the technique could  
35  
36 address other factors (e.g. stress) if relevant for the individual's behaviour. We also involved  
37  
38 the family members in the intervention to strengthen the participants to cope with social  
39  
40 pressure to eat sweet and fat products (see below) .  
41  
42  
43  
44  
45

46  
47 To address the socio-cultural influences that affect these personal determinants, we culturally  
48  
49 adapted the intervention as used in the SLIM study to the South Asian Surinamese population.  
50  
51 We have described the theoretical framework underlying the intervention and adaptations in  
52  
53 detail elsewhere [22]. In short, the aim was to enhance the cultural sensitivity of the  
54  
55 intervention, as this is likely to promote the effectiveness of interventions among specific  
56  
57  
58  
59  
60

1  
2  
3 ethnic populations [24]. We based our definition of cultural sensitivity on that of Resnicow:  
4  
5 ‘the extent to which ethnic/cultural characteristics, experiences, norms, values, behavioural  
6  
7 patterns and beliefs of a target population as well as relevant historical, environmental and  
8  
9 social forces are incorporated in the design, delivery and evaluation of targeted health  
10  
11 promotion interventions’ [25]. Cultural adaptations are divided into two major dimensions:  
12  
13 surface structure, which involves matching interventions materials and message to the  
14  
15 observable behaviour characteristics that are shared by the target population, and deep  
16  
17 structure adaptations, which target the social or cultural values underlying these behaviours.  
18  
19 We used both type of adaptations, e.g. a study logo based on the design of the Surinamese  
20  
21 flag and propositions on culturally held ideas regarding DM for the family session  
22  
23 respectively, to make the intervention attractive, appropriate and ultimately more potentially  
24  
25 effective in the present study population [22]. These adaptations were based on formative  
26  
27 research, including literature review, focus groups and the experiences in a pilot study [22].  
28  
29 The intervention was designed to be carried out by dietitians within their usual practice  
30  
31 setting. The aim was to meet current national guidelines for diet and physical activity [26,27].  
32  
33 In the first 6 months, dietitians used motivational interviewing during 6-8 individual lifestyle  
34  
35 counselling sessions, followed by 3-4 booster sessions over the following 18 months. The  
36  
37 dietitians were trained in motivational interviewing, in which previous successes, skills and  
38  
39 strengths of the client were highlighted to support self-efficacy [28]. All dietitians were also  
40  
41 familiar with the South Asian culture and dietary habits; three had South Asian roots  
42  
43 themselves, and the other three had experience working within the South Asian community.  
44  
45 On the basis of the aforementioned formative research, we identified four goals that seem to  
46  
47 be particularly important for promoting the effectiveness of the intervention, and for  
48  
49 addressing the barriers and motivating factors that appeared to be relevant in this South Asian  
50  
51 population. These were: 1. generating appropriate risk perception and conviction that diabetes  
52  
53  
54  
55  
56  
57  
58  
59  
60

1  
2  
3 can be prevented or at least postponed, 2. generating a positive attitude towards a healthy  
4 lifestyle, 3. mobilizing social support by involving participants' families in the intervention,  
5 and 4. creating the conviction that healthy eating can also be tasty [22].  
6  
7  
8

9  
10 In line with these goals, dietitians as well as the written materials paid specific attention to the  
11 issues of risk perception (e.g. by stressing the modifiability of risk factors for T2D), and  
12 positive attitude towards diet and PA (e.g. by giving suggestions for healthy eating based on  
13 traditional foods). In addition, dietitians offered a family session at the participant's home,  
14 with the aim to engage the family in supporting the individual participant in achieving dietary  
15 goals. Finally, participants were offered two group-based cooking classes to learn skills for  
16 adjusting traditional dishes to meet nutritional guidelines, thereby also increasing their self-  
17 efficacy.  
18  
19  
20  
21  
22  
23  
24  
25  
26  
27

28  
29 We also offered a 20-week physical activity programme to all participants in the intervention  
30 group. This 'exercise on prescription' programme is described elsewhere [29-31]. Trained  
31 coaches monitored participation in the programme.  
32  
33  
34  
35  
36  
37

### 38 **Control group**

39  
40 Participants in the control group were invited to join two group sessions led by student  
41 dietitians (at baseline and after 6 months). The sessions provided generic information about  
42 T2D and discussed current guidelines for diet and physical activity. These participants  
43 received two leaflets (at 3 and 9 months) with simple, generic lifestyle advice. The group  
44 sessions and leaflets were not targeted to characteristics of the target population.  
45  
46  
47  
48  
49  
50  
51

### 52 **Data collection**



1  
2  
3 Trial visits were planned for both groups at baseline, and after 1 and 2 years [20]. The  
4 invitation procedures for these visits were similar to the intensive procedures used during the  
5 screening. Participants who did not respond to the invitation for the follow-up visit were  
6  
7 contacted by telephone and received a written reminder. In addition to written confirmation of  
8  
9 their appointment, all participants received a text message reminder the day before their  
10  
11 appointment.  
12  
13  
14  
15

16  
17  
18 During the visit, a trained interviewer conducted a face-to-face interview with each participant  
19  
20 in Dutch or, optionally, in Sarnami (Surinamese dialect based on North Indian dialects). At  
21  
22 baseline, two participants in the trial asked to be interviewed in Sarnami. Trained research  
23  
24 staff used a standardised protocol for the physical examinations. They measured weight on a  
25  
26 mechanical scale (Seca 761, Hamburg, Germany) to the nearest 500 g and height was  
27  
28 measured to the nearest 0.01 m. The anthropometric measurements were obtained twice and  
29  
30 the means were used for analysis.  
31  
32  
33  
34  
35

36 During all visits, all participants provided a fasting blood sample and were offered an oral  
37  
38 glucose tolerance test. Measurements of fasting plasma glucose and 2-hour post-load glucose  
39  
40 (oral glucose tolerance test, 75 g; hexokinase, Roche Diagnostics), HbA1c (high-performance  
41  
42 liquid chromatography), and insulin (immunoassay, sandwich principle, Roche Diagnostics)  
43  
44 were carried out according to a standardised protocol at the SHL Group (laboratory), Etten-  
45  
46 Leur (the Netherlands). The HOMA-IR was calculated as glucose (mmol/l) multiplied by  
47  
48 fasting insulin (mU/l) divided by 22.5 [32].  
49  
50  
51  
52  
53

54 Data on participation were recorded by dieticians and obtained from the process data collected  
55  
56 from participants during the first year [20].  
57  
58  
59  
60

## Measurements and definitions

Physical activity, diet, and social-cognitive determinants of behaviour change were noted during the trial visits [23,33]. Physical activity was assessed with the Short Questionnaire to Assess Health-enhancing Physical Activity (SQUASH), supplemented with culturally-specific activities [34,35]. Three measures were defined: i) any versus no moderate-to-vigorous activity, ii) the total moderate-to-vigorous activity expressed in min/week, and iii) the total activity expressed in min/week.

Dietary intake was determined using questions based on the national guidelines for a healthy diet, supplemented with questions on group-specific dietary behaviours of the South Asian population [22,26; Online supplement 1]. Fruit, vegetables, rice, and whole wheat intake was assessed with multi-item questions (with 3, 2, 2, and 11 items, respectively) to determine the quantity and frequency. Moreover, two single-item questions addressed the regularity of the meals. These aspects of the diet were dichotomised into meeting versus not meeting the guideline (Box 1).

### Box 1. Categories used for meeting the dietary guidelines

|                        | Meeting the guideline <sup>a</sup>      |
|------------------------|-----------------------------------------|
| Fruit intake           | 2 pieces of fruit/day                   |
| Vegetable intake       | 200 g vegetables/day                    |
| Whole wheat intake     | Almost exclusively whole wheat products |
| Regular eating pattern | 3 meals/day at a regular time           |
| Rice intake            | Almost exclusively brown rice           |

<sup>a</sup>Derived from the current national guidelines for diet [26], with the exception of rice for which no guideline has been established.

### Social-cognitive determinants of behaviour change

Risk perception consisted of measures of perceived susceptibility and two components of Leventhal's common-sense model of representations of illness and self-regulation [36], i.e. causal beliefs and perceived controllability by physical activity. Causal beliefs were measured with 12 statements about the perceived influence of certain behaviours or characteristics on the onset of diabetes, on a 3-point Likert scale. The statements concerned (a) general lifestyle beliefs related to seven general risk factors for diabetes, (b) three group-specific lifestyle beliefs (consumption of masala and large amounts of white rice and sugar) derived from our focus group discussions, and (c) two heredity beliefs (e.g. family history of diabetes and being a South Asian) [22, 37]. The internal consistency of items was estimated with Cronbach's alpha ( $\alpha$ ), and an  $\alpha$  above 0.6 considered to be moderate and above 0.8 good. The general lifestyle beliefs related to overweight, unhealthy food, insufficient exercise, hypertension, age, and smoking were combined into a single factor based on the results of internal consistency analysis ( $n=6$ ,  $\alpha=0.63$ ; a score of  $\geq 4$  indicating 'perceiving general lifestyle as a cause of type 2 diabetes mellitus'). Perceived controllability with physical activity was measured by a single item on a 5-point Likert scale. Perceived susceptibility was measured with a 3-item perceived susceptibility score, on a 5-point Likert scale ( $n=3$ ,  $\alpha=0.63$ ) [38].

Internal consistency analysis resulted in three factors for attitudes towards physical activity and diet: direct (enjoyment and importance;  $n=4$ ,  $\alpha=0.64$ ) and indirect attitude towards physical activity (possible consequences of increasing physical activity;  $n=7$ ,  $\alpha=0.67$ ), and the attitude towards conventional healthy dietary behaviours (enjoyment and importance of a regular eating pattern and breakfast, fruit, vegetable, whole wheat intake;  $n=10$ ,  $\alpha=0.84$ ). We also measured the attitudes (enjoyment and importance) towards two group-specific healthy dietary behaviours (replacing white rice with brown rice, and refusing snacks at parties).

1  
2  
3  
4  
5 Two factors were formed for social support: perceived social support for physical activity  
6  
7 from other family members and close relatives ( $n=2$ ,  $\alpha=0.68$ ), and perceived social support  
8  
9 for the conventional healthy dietary behaviours ( $n=5$ ,  $\alpha=0.94$ ). We also measured the  
10  
11 perceived social support for physical activity from the spouse and the perceived social support  
12  
13 for two group-specific healthy dietary behaviours (replacing white rice with brown rice, and  
14  
15 refusing snacks at parties).  
16  
17

18  
19  
20 Self-efficacy was reflected in two combined factors: perceived self-efficacy for physical  
21  
22 activity ( $n=5$ ,  $\alpha=0.73$ ), and perceived self-efficacy for the conventional healthy dietary  
23  
24 behaviours ( $n=5$ ,  $\alpha=0.66$ ). Moreover, we measured self-efficacy expectations for two group-  
25  
26 specific healthy dietary behaviours (replacing white rice with brown rice, and refusing snacks  
27  
28 at parties).  
29  
30

31  
32 The stages of change towards diet and physical activity were classified as being motivated or  
33  
34 not motivated to change one's diet according to the Dutch guidelines, and physical activity  
35  
36 within 6 months. The stage of change towards diet was measured for each specific dietary  
37  
38 behaviour. One factor was formed for stage of change towards the conventional healthy  
39  
40 dietary behaviours ( $n=5$ ,  $\alpha=0.73$ ).  
41  
42  
43  
44

45 Because of the skewness of the variables, we dichotomized all resulting variables, e.g.  
46  
47 perceiving versus not perceiving having a family history of diabetes as cause. In addition, as  
48  
49 the group-specific items (e.g. refusing snacks at parties) did not load on the aforementioned  
50  
51 scales, we decided to include these in the analysis as single items.  
52  
53  
54

## 55 56 **Other factors** 57 58 59 60

1  
2  
3 Age and gender were determined from the GPs' registries. Country of birth, duration of  
4 residence, low education level (primary education or less), having paid work were measured  
5 at the initial screening. Low family income ( $\leq$ net 998 euros/month) was determined at  
6  
7 baseline. A family history of diabetes was defined as having a first- or second-degree family  
8 member with diabetes. Body mass index (BMI) was calculated as weight (kg)/height (m)<sup>2</sup>.  
9  
10  
11  
12  
13

### 14 15 16 **Statistical analysis**

17  
18 In the current analysis we included all those who participated in both the baseline  
19 measurement and measurement at 2-year follow-up, and excluded anyone without data on  
20 physical activity or diet at baseline and/or at 2-year follow-up (Figure 1). This means that 314  
21 participants remained for the present analysis: 165 in the intervention group with a mean  
22 follow-up time of 22.1 (95%-confidence interval (95%CI): 21.0-23.8) months and 149 in the  
23 control group with a mean follow-up time of 22.1 (95%CI : 21.3-23.2) months.  
24  
25  
26  
27  
28  
29  
30  
31  
32  
33

34 We described the baseline characteristics of the remaining participants in both groups.  
35 Continuous variables were described using means (95%CIs). Continuous variables that were  
36 not normally distributed, based on visual inspection, skewness and kurtosis values, were  
37 described with a median and interquartile range (IQR). Baseline differences in continuous  
38 variables between the intervention and control group were checked using independent sample  
39 t-tests and ,where relevant, Mann-Whitney U tests. Categorical variables were described by  
40 reporting the n (percentage) with a certain characteristic. Group differences were tested with  
41 chi-square tests.  
42  
43  
44  
45  
46  
47  
48  
49  
50

51 In addition, for those in the intervention group, their participation in elements of the  
52 intervention was described. We calculated the percentage who participated in the intake for  
53 the individual lifestyle counselling, and of this group the percentage who attended at least one  
54  
55  
56  
57  
58  
59  
60

1  
2  
3 more session after the intake. We also report the median (IQR) number of sessions attended  
4  
5 (in addition to the initial intake visit) within this group. Finally we determined the percentage  
6  
7 participating in cooking classes, family sessions and/or the supervised exercise programme.  
8  
9 Changes in physical activity, diet and the social-cognitive determinants of behaviour change  
10  
11 are also described. For the continuous measures, the change was determined between baseline  
12  
13 and 1 and 2-year follow-up, respectively. As the changes appeared normally distributed  
14  
15 (based on visual inspection, and the skewness and kurtosis values), we report the mean  
16  
17 changes in the intervention and control group. For the categorical measures, we determined  
18  
19 the percentage of participants with a positive change (e.g. those who changed from non-  
20  
21 adherent to adherent to the guideline for fruit intake) or a negative change (e.g. those who  
22  
23 changed from a regular to an irregular meal pattern) at 1 and 2-year follow-up. The remaining  
24  
25 participants had not changed their behaviour for that specific measure. Except for the belief  
26  
27 that masala intake is a possible cause of diabetes, and the attitude towards refusing snacks at  
28  
29 parties, positive changes were expected to positively influence lifestyle behaviour and health.  
30  
31 Independent sample t-tests were used to compare the mean changes between the intervention  
32  
33 and control group in continuous measures. Chi square tests were used to compare the  
34  
35 percentage positive and negative changes between the two groups. Where expected counts per  
36  
37 cell were low, we merged the 'negative change' and 'unchanged' categories, and compared  
38  
39 the percentage 'positive change' across groups with a Fisher's exact test. As the present  
40  
41 analysis focuses on the effects two years post-baseline, only the full p values for the  
42  
43 differences at 2 years are reported.  
44  
45  
46  
47  
48  
49  
50  
51

52 In the present study we did not consider multiple imputations or more complex modelling of  
53  
54 patterns of missingness. This decision was based on a comparison of the baseline  
55  
56 characteristics between participants with and those without a measurement at 2-year follow-  
57  
58  
59  
60

1  
2  
3 up (Online supplement 2). Apart from being younger and having a higher HOMA-IR, those  
4  
5 who participated in the measurement at 2-year follow-up had baseline characteristics similar  
6  
7 to those who dropped-out. We used logistic regression to examine differences in drop-out  
8  
9 across groups. Drop-out was similar in both groups [age and sex adjusted OR 1.02 (95%CI:  
10  
11 0.72-1.45)], and these differences did not vary by age or gender ( $p>0.05$  for the interaction  
12  
13 terms). In addition, we previously analysed different patterns of missingness in relation to the  
14  
15 reported total physical activity, meal pattern and whole wheat consumption, using a pattern  
16  
17 mixture model in the total study population and found no significant evidence for an effect of  
18  
19 missingness on our outcomes (data not shown).  
20  
21  
22  
23  
24

25 In the current paper, we did not perform multilevel analysis with the data on dieticians. In line  
26  
27 with previous analyses of the DHIAAN data [14, 33], no evidence was found for  
28  
29 dependencies between participants registered with the same dietician (data not shown). We  
30  
31 analyzed this with two-level regression models (individual and dietician) with a random  
32  
33 intercept at the level of the dietician. Furthermore, as only 29 people with family members in  
34  
35 the study had follow-up data available (intervention  $n=18$ , control  $n=11$ ), no multilevel  
36  
37 analysis was performed on family data. Analysis of reported total physical activity, meal  
38  
39 pattern and whole wheat consumption after exclusion of all people with family members in  
40  
41 the study showed similar results to the analysis in the full population (data not shown).  
42  
43  
44  
45  
46

47 The SPSS 19.0 (SPSS Inc., Chicago, Illinois, USA) and R2.15.3 (R Foundation for Statistical  
48  
49 Computing, 2009) were used for the analyses. A  $p$ -value  $<0.05$  was considered to be  
50  
51 statistically significant.  
52  
53  
54  
55  
56  
57  
58  
59  
60

## RESULTS

### *Baseline characteristics*

At baseline, both groups were similar in terms of demographic characteristics and physical activity (Table 1). Most of the participants reported to be moderately-to-vigorously active: 82% of the intervention group and 79% of the control group. Moreover, at baseline, similar proportions in both groups met the guidelines for fruit, whole wheat intake, a regular meal pattern, and use of brown rice. However, vegetable intake differed between the groups: 68% of the intervention group ate 200 g of vegetables/day compared with 56% of the control group. At baseline, the social-cognitive determinants (with the exception of enjoyment of snacks) were also similar in both groups. The observed percentage of people with a positive response varied largely between the determinants. For example,  $\geq 90\%$  of both groups had a positive attitude toward physical activity and a healthy diet, whereas  $\leq 50\%$  of the population reported to experience social support from their partner regarding healthy behaviour.

### *Participation in the intervention*

In the intervention group, 81.8% of the respondents participated in the intake for the individual lifestyle counselling sessions. Of this latter group, 94.8% attended at least one additional session, with a median number of eight sessions (IQR: 4-9) per person. Moreover, 14.4% participated in a supplemental family session, 12.7% in the cooking classes and 26.3% in the supervised exercise sessions.

### *Effect of the intervention on physical activity and diet*

Participants in the intervention group were more moderately-to-vigorously active at 2-year follow-up than at baseline but, compared with the change in the control groups, the difference was not significant (Table 2). In addition, while more participants in the intervention group



1  
2  
3 than in the control group met the guidelines for several dietary behaviours (e.g. whole wheat  
4 intake, eating brown rice and fruit) at 2-year follow-up, none of these changes significantly  
5 differed between the groups (Table 2).  
6  
7  
8  
9

10  
11 Remarkably, a substantial percentage of people who were adherent to a specific guideline at  
12 baseline were no longer adherent 1 or 2 years later ('negative' change). For most behaviours  
13 this percentage is almost as high as the percentage 'positive' change.  
14  
15  
16  
17  
18  
19

### 20 *Effect of the intervention on social-cognitive determinants of behaviour change*

21  
22 At 2-year follow-up, no significant difference was found between the two groups in any of the  
23 social-cognitive determinants of behaviour change (Table 3). A positive change was observed  
24 in several of the social-cognitive determinants of behaviour change among part of the  
25 intervention group and similar changes were observed in the control group. For instance,  
26 22.4% of those in the intervention group who did not perceive themselves as susceptible at  
27 baseline, perceived themselves as susceptible to the onset of diabetes after 2 years; in the  
28 control group, this figure was 21.5% (p=0.941 for the difference between groups). Similar to  
29 the results for dietary behaviour and physical activity, remarkably high percentages of  
30 participants showed a 'negative' change in social-cognitive determinants.  
31  
32  
33  
34  
35  
36  
37  
38  
39  
40  
41  
42  
43  
44  
45  
46  
47  
48  
49  
50  
51  
52  
53  
54  
55  
56  
57  
58  
59  
60

## DISCUSSION

This study examined the effect of a culturally-targeted intervention on dietary behaviour and physical activity among a South Asian population at risk of T2D. At 2-year follow-up, no significant difference was found between the intervention and the control group in changes in any of the components of dietary and physical activity behaviour, or in the social-cognitive determinants underlying these behaviours. Notably, in both groups, the proportion of participants reporting a less healthy behaviour at 2-year follow-up almost equalled the proportion reporting a more healthy behaviour. The percentage of participants lost to follow-up was high.

### *Study Limitations*

In addition to a relatively low response rate for the initial screening and for the baseline evaluation, a relatively high number of participants dropped-out of the study. This low participation rate limits the reach and potential impact that the intervention may have in practice. In addition, we are aware that selective drop-out may lead to a biased estimate of intervention effects. However, analysis of the characteristics of those who dropped-out and the evaluation of patterns of missingness provided no clear evidence on the direction in which our estimates may have been biased. This is in line with our previous analyses on the longitudinal DHIAAN data at 1-year follow-up, that showed no relevant contribution of multiple imputations to the interpretation of our data [14]. Nevertheless, it seems fair to consider the high drop-out rate as a sign that for many participants the intervention did not meet their perceived needs.

In the interpretation of our results, it should also be noted that self-reported questionnaire data were used to assess the change in physical activity, diet and the determinants of behaviour

1  
2  
3 change. We cannot exclude the possibility that our participants gave socially desirable  
4  
5 answers [39], potentially influenced by an increase in awareness after the start of the  
6  
7 intervention. As recommended, we added culturally-specific activities to the physical activity  
8  
9 questionnaire (such as yoga and dancing) to mitigate cultural differences in recommended  
10  
11 physical activity [35]; nevertheless, the validity of this measurement may have been  
12  
13 suboptimal. To measure diet, we included a limited number of questions on specific  
14  
15 behaviours, which may be less reliable than biomarkers or a more complete measurement of  
16  
17 food intake such as a food frequency questionnaire [40,41]. As a result, we may have missed  
18  
19 more general positive changes in other aspects of the diet, potentially due to the intervention.  
20  
21  
22  
23

24  
25 In addition, because the reference period for the physical activity and diet questionnaire  
26  
27 spanned a few months, the answers may have been influenced by recall bias [40]. Although  
28  
29 the effect of these types of bias apply to both groups, the effects could differ between the  
30  
31 groups, e.g. due to the focus on certain behaviours during the intensive counselling in the  
32  
33 intervention group. However, this seems very unlikely given the small differences between  
34  
35 the two groups in reported changes. Therefore, we conclude that it is unlikely that these  
36  
37 methodological limitations have substantially biased the present results.  
38  
39  
40  
41  
42

### 43 *Discussion of main findings*

44  
45 At 2-year follow-up we found that a culturally-targeted lifestyle intervention in primary care  
46  
47 did not change the dietary behaviour and physical activity of this group of South Asian people  
48  
49 at risk of T2D. This is in line with our observation of no effect of the intervention on weight  
50  
51 status and other metabolic risk factors at 1-year follow-up [14]. However, a lack of effect on  
52  
53 metabolic outcomes at one year does not rule out the possibility that the health behaviours or  
54  
55 the underlying determinants may still change due to the intervention. The results of the  
56  
57  
58  
59  
60

1  
2  
3 present study suggest that this was not the case. On the contrary, the health behaviour of a  
4  
5 substantial number of participants even deteriorated. This was unexpected given the intensity  
6  
7 of our intervention, an element previously shown to increase the effectiveness of such a  
8  
9 lifestyle programme [42]. Although changes in reported behaviour may also be the result of  
10  
11 increased awareness among participants of their own (poor) diet and physical activity, the  
12  
13 negative finding matches the weight gain reported for some participants after one year of  
14  
15 follow-up [14].  
16  
17  
18  
19

20  
21 There are several possible reasons for the lack of an effect of the intervention on health  
22  
23 behaviour. First, despite being classified as being at risk for diabetes (i.e. impaired glucose  
24  
25 tolerance, impaired fasting glucose, or relatively high insulin resistance) the participants were  
26  
27 relatively healthy and health conscious. For instance, the mean BMI was lower compared to  
28  
29 other, similar, populations [2-4, 6-8]. Moreover, a substantial part of our population met the  
30  
31 guidelines for a healthy diet at baseline and indicated that they considered physical activity  
32  
33 and a healthy diet important. These positive characteristics probably leave little room for  
34  
35 improvement with an intervention aimed at a healthy lifestyle alone. To effectively reduce the  
36  
37 burden of T2D among South Asians, future interventions should explore new strategies, e.g.  
38  
39 focus on more specific forms of physical activity [43]. In addition, the low initial response  
40  
41 rate in combination with the high drop-out rate raise the question whether an intensive  
42  
43 intervention as employed in this study is the optimal approach to reach those in need in this  
44  
45 high-risk population. It suggests that, despite all efforts to adapt the intervention, the current  
46  
47 design is not attractive and acceptable to the target population. More acceptable interventions  
48  
49 that reach a larger proportion of those with an increased risk of T2D seem necessary in order  
50  
51 to effectively reduce the risk of T2D at population level. This might include more community-  
52  
53 engaged interventions. Broader involvement from the community as a whole, perhaps in an  
54  
55  
56  
57  
58  
59  
60

1  
2  
3 even earlier phase of the project or in different aspects, might improve the acceptability and  
4  
5 enhance the response to the intervention. Nevertheless, the current project builds on a long  
6  
7 tradition of health interventions by the Municipal Health Service of the Hague (B.M).  
8  
9 Moreover, we have tried to engage community members and professionals in the adaptation  
10  
11 of the intervention during the pilot [20].  
12  
13

14  
15  
16 Secondly, the intervention primarily addressed the individual and only marginally targeted the  
17  
18 individual's environment. However, changes in the physical and social environment may  
19  
20 necessary to influence the accessibility to and the social norm towards a healthy lifestyle,  
21  
22 making it easier to make healthier lifestyle choices [18,44]. For instance, evidence from the  
23  
24 EPODE (Ensemble, Prévenons l'Obésité Des Enfants) approach suggests that environmental  
25  
26 changes implemented by the private and public sectors are essential for behaviour change on  
27  
28 the long term [45]. We attempted to make the intervention accessible by offering a local  
29  
30 physical activity programme, and having dietitians carry out the intervention as part of their  
31  
32 dietitian practice. However, we did not involve the private and public sectors to make  
33  
34 adjustments to the immediate environment to facilitate healthier lifestyle choices, e.g. in local  
35  
36 (South Asian) supermarkets or at work. In that case the intervention might have benefited  
37  
38 from support for the intended behaviour changes via changes in the environment. This  
39  
40 explanation is supported by data from similar interventions in a primary care setting [6-8, 46]  
41  
42 that also failed to positively change health behaviour. For instance, an intervention study in a  
43  
44 Dutch primary care setting reported a significant difference between the groups only for  
45  
46 physical activity and fibre intake [6]. At the same time, we should be cautious in our  
47  
48 expectations. Previous research indicates that the dietary patterns of South Asian Surinamese  
49  
50 are rather robust across acculturation strategies. More specifically, South-Asian Surinamese  
51  
52 participants reported significantly higher intakes of rice (staple food) and chicken  
53  
54  
55  
56  
57  
58  
59  
60

1  
2  
3 (complementary food) and significantly lower intakes of red meat and vegetables  
4  
5 (complementary foods) and cookies and sweets (accessory food) as compared to the host  
6  
7 population [47]. The robustness of these patterns probably suggest that a single intervention  
8  
9 will not suffice to change these patterns. .  
10

11  
12  
13  
14 Thirdly, the intervention as implemented may not have met the needs of our specific  
15  
16 population. This might partly be due to a suboptimal implementation of the targeted  
17  
18 intervention. We, for example, found that the adapted counselling method– using the  
19  
20 principles of motivational interviewing - had not been fully applied during the sessions of the  
21  
22 dieticians [48]. The difficulties that we experienced with application of this method have also  
23  
24 been reported in other studies [e.g. 49]. Hence, one might question whether professionals in  
25  
26 practice can be expected to show motivational interviewing skills in this kind of interventions  
27  
28 as long as these skills are not a fully integrated part of the baseline qualifications of these  
29  
30 professionals. Moreover, although we purposefully invested in culturally targeting the  
31  
32 intervention, and the majority of participants perceived the materials as clear and attractive,  
33  
34 we cannot rule out the possibility that further investments, or investments in other elements  
35  
36 could have improved the effectiveness of the interventions. This also applies to the choice for  
37  
38 the technique of motivational interviewing. The experiences of some dieticians seemed to  
39  
40 indicate that this technique was less effective for this South Asian origin population, as some  
41  
42 participants preferred a more directive style and ‘just wanted a list what to do or what to eat’  
43  
44 [48]. Additionally, few participants took up the offer of a family session. This seems in  
45  
46 contrast with the success of family oriented sessions in a comparable trial among South  
47  
48 Asians in the UK [15]. This difference between both trials might indicate the importance of  
49  
50 involvement of the family from the start of the intervention, rather than in a separate family  
51  
52 session [47]. On the other hand, it might also reflect real differences between the South Asian  
53  
54  
55  
56  
57  
58  
59  
60

1  
2  
3 population in the UK and that in the Netherlands. As the latter have migrated via Surinam, a  
4 former Dutch colony, this might have led to a situation where they have been more adapted to  
5 the host culture than the South Asians in the UK. More studies are needed to elucidate the  
6 specific elements which make cultural targeting effective in this population [50].  
7  
8  
9  
10

### 11 12 13 **Conclusions**

14  
15  
16 In this group of South Asians (aged 18-60 years) at risk of diabetes, a culturally-targeted  
17 lifestyle intervention was not effective in promoting healthy behaviour. At 2-year follow-up  
18 the changes in dietary behaviour, physical activity or underlying social-cognitive determinants  
19 in the intervention group did not differ from those in the control group. Given the high *a*  
20 *priori* risk and the specific characteristics of the target population, we recommend further  
21 research to determine whether an updated strategy, preferably more acceptable for the target  
22 population, may change health behaviours through changes in the underlying social-cognitive  
23 determinants (e.g. social norms and self-efficacy) in this high-risk South Asian population.  
24  
25  
26  
27  
28  
29  
30  
31  
32  
33  
34  
35  
36  
37  
38  
39  
40  
41  
42  
43  
44  
45  
46  
47  
48  
49  
50  
51  
52  
53  
54  
55  
56  
57  
58  
59  
60

### Authors' contributions

EV and IV analyzed the data. EV contributed to the interpretation, and drafted the first version of the manuscript. IV and KS designed the study, contributed to the interpretation of the data, and edited the manuscript. VN, BM and MN gave advice for the design and interpretation. WB contributed to the analysis and interpretation. All authors reviewed the manuscript and approved the final version.

### Competing interests

All authors declare that they have no competing interests.

### Funding statement

This study was funded by the Netherlands Organisation for Health Research and Development (ZonMw; grant no.120620023).

### Data sharing statement

No additional data supporting the present paper are available online. Data collected during the study, as described in doi: 10.1186/1471-2458-12-371, after a collaboration agreement is signed. Researchers may contact i.g.vanvalkengoed@amc.nl or k.stronks@amc.nl.



## REFERENCES

1. Zimmet PZ. Primary prevention of diabetes mellitus. *Diabetes Care*. 1988; 11:258-262
2. Roumen C, Corpeleijn E, Feskens EJ, Mensink M, Saris WH, Blaak EE. Impact of 3-year lifestyle intervention on postprandial glucose metabolism: the SLIM study. *Diabet Med*. 2008; 25:597-605
3. Knowler WC, Barrett-Connor E, Fowler SE, et al. Reduction in the incidence of type 2 diabetes with lifestyle intervention or metformin. *N Engl J Med*. 2002; 346:393-403
4. Tuomilehto J, Lindstrom J, Eriksson JG, et al. Prevention of type 2 diabetes mellitus by changes in lifestyle among subjects with impaired glucose tolerance. *N Engl J Med*. 2001; 344:1343-1350
5. Ramachandran A, Snehalatha C, Mary S, Mukesh B, Bhaskar AD, Vijay V. The Indian Diabetes Prevention Programme shows that lifestyle modification and metformin prevent type 2 diabetes in Asian Indian subjects with impaired glucose tolerance (IDPP-1). *Diabetologia*. 2006; 49:289-297
6. Vermunt PW, Milder IE, Wielaard F, de Vries JH, van Oers HA, Westert GP. Lifestyle counseling for type 2 diabetes risk reduction in Dutch primary care: results of the APHRODITE study after 0.5 and 1.5 years. *Diabetes Care*. 2011; 34:1919-1925
7. Kontogianni MD, Liatis S, Grammatikou S, Perrea D, Katsilambros N, Makrilakis K. Changes in dietary habits and their association with metabolic markers after a non-intensive, community-based lifestyle intervention to prevent type 2 diabetes, in Greece. The DEPLAN study. *Diabetes Res Clin Pract*. 2012; 95:207-214
8. Kujala UM, Jokelainen J, Oksa H, et al. Increase in physical activity and cardiometabolic risk profile change during lifestyle intervention in primary healthcare: 1-year follow-up study among individuals at high risk for type 2 diabetes. *BMJ Open*. 2011; 1:e000292. doi:10.1136/bmjopen-2011-000292
9. Wild S, Roglic G, Green A, Sicree R, King H. Global prevalence of diabetes: estimates for the year 2000 and projections for 2030. *Diabetes Care*. 2004; 27: 1047-1053
10. Kanaya AM, Wassel CL, Mathur D, Stewart A, Herrington D, Budoff MJ et al.. Prevalence and correlates of diabetes in South Asian Indians in the United States: findings from the metabolic syndrome and atherosclerosis in South asians living in America study and the multi-ethnic study of atherosclerosis. *Metab Syndr Relat Disord*. 2010; 8: 157-164
11. Gholap N, Davies M, Patel K, Sattar N, Khunti K. Type 2 diabetes and cardiovascular disease in South Asians. *Prim Care Diabetes*. 2011; 5: 45-56
12. Bindraban NR, van Valkengoed IG, Mairuhu G, et al. Prevalence of diabetes mellitus and the performance of a risk score among Hindustani Surinamese, African Surinamese and ethnic Dutch: a cross-sectional population-based study. *BMC Public Health*. 2008; 8: 271
13. Misra A, Ganda OP. Migration and its impact on adiposity and type 2 diabetes. *Nutrition*. 2007; 23:696-708
14. Admiraal W, Vlaar L, Nierkens V, et al. Intensive lifestyle intervention in general practice to prevent type 2 diabetes among 18 to 60-year-old South Asians: 1-year effects on the weight status and metabolic profile of participants in a randomized controlled trial. *Plos One* 2013;8:e68605

15. Bhopal RS, Douglas A, Wallia S, Forbes JF, Lean ME, Gill JM, McKnight JA, Sattar N, Sheikh A, Wild SH, Tuomilehto J, Sharma A, Bhopal R, Smith JB, Butcher I, Murray GD. Effect of a lifestyle intervention on weight change in south Asian individuals in the UK at high risk of type 2 diabetes: a family-cluster randomised controlled trial. *Lancet Diabetes Endocrinol* 2014;2:218-27
16. Weber MB, Oza-Frank R, Staimez LR, Ali MK, Narayan KM. Type 2 diabetes in Asians: prevalence, risk factors, and effectiveness of behavioral intervention at individual and population levels. *Annu Rev Nutr*. 2012; 32:417-439
17. Rosenstock IM. The health belief model and nutrition education. *J Can Diet Assoc*. 1982; 43: 184-192
18. Ajzen I. The theory of planned behaviour: reactions and reflections. *Psychol Health*. 2011; 26: 1113-1127
19. Prochaska JO, Johnson S, Lee P, et al. The transtheoretical model of behavior change. *The handbook of health behavior change*. 2 edition New York: Springer Publishing Co, 59-84, 1998
20. Vlaar EM, van Valkengoed IG, Nierkens V, Nicolaou M, Middelkoop BJ, Stronks K. Feasibility and effectiveness of a targeted diabetes prevention program for 18 to 60-year-old South Asian migrants: design and methods of the DH!AAN study. *BMC Public Health*. 2012; 12:371
21. Choenni C, Harmsen C. Place of birth and ethnic composition of the Surinamese in the Netherlands in Dutch. *Bevolkingstrends*. 2007; 1: 74-78
22. Nicolaou M, Vlaar EMA, van Valkengoed IG, Middelkoop BJ, Stronks K, Nierkens V.. Development of a diabetes prevention program for Surinamese South Asians in the Netherlands. *Health Promotion International* 2013;29:680-91
23. Mensink M, Feskens EJM, Saris WHM, de Bruin TW, Blaak EE:. Study on Lifestyle Intervention and Impaired Glucose Tolerance Maastricht (SLIM): design and screening results. *Diabetes Res Clin Pract*. 2003; 61:49-58
24. Bartholomew LK, Parcel GS, Kok G, Gottlieb NH, Fernandez M. Planning health promotion programs. An intervention mapping approach. 3th ed San Francisco, CA: Jossey-Bass, 19, 171-306, 2011
25. Health Council of the Netherlands. Guidelines for a healthy diet: the ecological perspective. The Hague: Health Council of the Netherlands. 2011
26. Resnicow K, Baranowski T, Ahluwalia JS, Braithwaite RL. Cultural sensitivity in public health: defined and demystified. *Ethnicity & Disease* 1999;9:10-21.
27. Kemper HCG, Ooijendijk WTM, Stiggelbout M. Concensus over de Nederlandse norm voor gezond bewegen. *Tijdschrift voor Gezondheidswetenschappen (TSG)*. 2000; 78: 180-183
28. Resnicow K, McMaster F. Motivational Interviewing: moving from why to how with autonomy support. *Int J Behav Nutr Phys Act*. 2012; 9:19
29. Hoesper K, Deutekom M, Stronks PK. The effectiveness of "Exercise on Prescription" in stimulating physical activity among women in ethnic minority groups in the Netherlands: protocol for a randomized controlled trial. *BMC Public Health*. 2008; 8:406

- 1
- 2
- 3 30. Schmidt M, Absalah S, Nierkens V, Stronks K. Which factors engage women in deprived
- 4 neighbourhoods to participate in exercise referral schemes? *BMC Public Health*. 2008;
- 5 8:371
- 6
- 7 31. Gademan MGJ, Deutekom M, Hosper K, Stronks K. The effect of exercise on prescription
- 8 on physical activity and wellbeing in a multi-ethnic female population: A controlled trial.
- 9 *BMC Public Health*. 2012; 12:758
- 10
- 11 32. Matthews DR, Hosker JP, Rudenski AS, Naylor BA, Treacher DF, Turner RC.
- 12 Homeostasis model assessment: insulin resistance and beta-cell function from fasting
- 13 plasma glucose and insulin concentrations in man. *Diabetologia*. 1985; 28:412-419
- 14
- 15 33. Vlaar EMA, Nierkens V, Nicolaou M, Middelkoop BJ, Stronks K, van Valkengoed IG.
- 16 Risk perception is not associated with attendance at a preventive intervention for type 2
- 17 diabetes mellitus among South Asians at risk of diabetes. *Publ Health Nutrition*
- 18 2014;18:1109-18
- 19
- 20 34. Wendel-Vos GC, Schuit AJ, Saris WH, Kromhout D. Reproducibility and relative validity
- 21 of the short questionnaire to assess health-enhancing physical activity. *J Clin Epidemiol*.
- 22 2003; 56:1163-1169
- 23
- 24 35. de Munter JS, van Valkengoed IG, Agyemang C, Kunst AE, Stronks K. Large ethnic
- 25 variations in recommended physical activity according to activity domains in amsterdam,
- 26 the Netherlands. *Int J Behav Nutr Phys Act*. 2010; 7:85
- 27
- 28 36. Leventhal H, Kelly K, Leventhal EA. Population risk, actual risk, perceived risk, and
- 29 cancer control: a discussion. *J Natl Cancer Inst Monogr*. 1999; 81-85
- 30
- 31 37. Lindstrom J, Tuomilehto J. The diabetes risk score: a practical tool to predict type 2
- 32 diabetes risk. *Diabetes Care*. 2003; 26: 725-731
- 33
- 34 38. Claassen L, Henneman L, van der Weijden T, Marteau TM, Timmermans DR. Being at
- 35 risk for cardiovascular disease: perceptions and preventive behavior in people with and
- 36 without a known genetic predisposition. *Psychol Health Med*. 2012; 17: 511-521
- 37
- 38 39. Shephard RJ. Limits to the measurement of habitual physical activity by questionnaires.
- 39 *Br J Sports Med*. 2003; 37:197-206
- 40
- 41 40. Kremers SP, Visscher TL, Seidell JC, van Mechelen W, Brug J. Cognitive determinants of
- 42 energy balance-related behaviours: measurement issues. *Sports Med*. 2005; 35:923-933
- 43
- 44 41. Verschuren P, Doorewaard H. Designing a research project. 1 edition Utrecht, The
- 45 Netherlands: Lemma, 125-169, 2005
- 46
- 47 42. Balk EM, Earley A, Raman G, Avendano EA, Pittas AG, Remington RL. Combined Diet
- 48 and Physical Activity Promotion Programs to Prevent Type 2 Diabetes Among Persons at
- 49 Increased Risk: A Systematic Review for the Community Preventive Services Task Force.
- 50 *Ann Int Med* 2015;163:437-451
- 51
- 52 43. Treserras MA, Balady GJ. Resistance training in the treatment of diabetes and obesity:
- 53 mechanisms and outcomes. *J Cardiopulm Rehabil Prev* 2009;29:67-75
- 54
- 55 44. Brug J, van Lenthe, F. Environmental determinants and interventions for physical activity,
- 56 nutrition and smoking: A review. Netherlands Organisation for Health Research and
- 57 Development (ZonMw): 2005
- 58
- 59
- 60

- 1  
2  
3 45. Romon M, Lommez A, Tafflet M, et al. Downward trends in the prevalence of childhood  
4 overweight in the setting of 12-year school- and community-based programmes. *Public*  
5 *Health Nutrition*. 12, 1735–1742  
6  
7 46. Aziz Z, Absetz P, Oldroyd J, Pronk NP, Oldenburg B. A systematic review of real-world  
8 diabetes prevention programs: learning from the past 15 years. *Implementation Science*  
9 2015;10:172  
10  
11 47. Raza Q, Nicolaou M, Snijder MB, Stronks K, Seidell JC. Dietary acculturation among the  
12 South-Asian Surinamese population in the Netherlands: the HELIUS study. *Public Health*  
13 *Nutr*. 2016 Apr 28:1-10. [Epub ahead of print]  
14  
15 48. Linda Vlaar. Feasibility and effectiveness of a culturally targeted diabetes prevention  
16 program among South Asians in Dutch primary care. The DH!AAN-study. Amsterdam:  
17 University of Amsterdam, PhD thesis 2014.  
18  
19 49. Noordman J, van Lee I, Nielen M, Vlek H, van Weijden T, van Dulmen S. Do trained  
20 practice nurses apply motivational interviewing techniques in primary care consultations?  
21 *J Clin Med Res* 2012;4:393-401  
22  
23 50. Nierkens V, Hartman MA, Nicolaou M, Vissenberg C, Beune EJ, Hosper K, van  
24 Valkengoed IG, Stronks K. Effectiveness of cultural adaptations of interventions aimed at  
25 smoking cessation, diet, and/or physical activity in ethnic minorities. a systematic review.  
26 *PLoS One* 2013;8:e73373  
27  
28  
29  
30  
31  
32  
33  
34  
35  
36  
37  
38  
39  
40  
41  
42  
43  
44  
45  
46  
47  
48  
49  
50  
51  
52  
53  
54  
55  
56  
57  
58  
59  
60

**Table 1. Baseline characteristics of participants with a measurement of physical activity and diet at baseline and at 2-year follow-up measurement**

|                                   |                                                                    | Intervention group,<br>N=165 | Control group, N=149   |
|-----------------------------------|--------------------------------------------------------------------|------------------------------|------------------------|
| <b>Socio-demographic</b>          | <b>Male</b>                                                        | 75 (45.5)                    | 77 (52.0)              |
|                                   | <b>Mean age (years)</b>                                            | 44.9 (43.5-46.5)             | 44.7 (43.1-46.4)       |
|                                   | <b>Low education</b>                                               | 16 (10.1)                    | 20 (13.8)              |
|                                   | <b>Paid work</b>                                                   | 115 (70.6)                   | 104 (70.3)             |
|                                   | <b>Family income <math>\leq</math>net 998 euros/month</b>          | 18 (2.3)                     | 14 (10.0) <sup>a</sup> |
|                                   | <b>Country of birth (Netherlands)</b>                              | 14 (8.5)                     | 14 (9.5)               |
|                                   | <b>Mean duration of residence (years)</b>                          | 28.8 (28.2-30.4)             | 27.9 (26.4-29.4)       |
|                                   | <b>Family history of diabetes</b>                                  | 124 (77.5)                   | 103 (71.5)             |
| <b>Metabolic</b>                  | <b>Mean body mass index</b>                                        | 27.7 (27.1-28.3)             | 27.2 (26.6-27.8)       |
|                                   | <b>Mean fasting plasma glucose</b>                                 | 5.3 (5.2-5.4)                | 5.3 (5.3-5.4)          |
|                                   | <b>Mean 2-h post-load glucose</b>                                  | 6.1 (5.8-6.3)                | 6.0 (5.7-6.2)          |
|                                   | <b>Mean glycated haemoglobin</b>                                   | 5.7 (5.6-5.8)                | 5.7 (5.6-5.7)          |
|                                   | <b>Median HOMA-IR</b>                                              | 3.0 (2.2-4.1)                | 2.8 (2.1-3.9)          |
|                                   | <b>Any moderate-to-vigorous activity</b>                           | 135 (81.8)                   | 118 (79.2)             |
| <b>Physical activity</b>          | <b>Mean moderate-to-vigorous activity (min/week)</b>               | 628.0 (504.1-751.9)          | 665.6 (523.2-807.9)    |
|                                   | <b>Mean total activity (min/week)</b>                              | 2698.8 (2534.2-2863.5)       | 2451.3 (2262.7-2640.0) |
| <b>Dietary intake<sup>b</sup></b> | <b>Fruit: 2 pieces /day (%)</b>                                    | 71 (43.3)                    | 55 (36.9)              |
|                                   | <b>Vegetables: 200 g/day (%)</b>                                   | 112 (67.9)                   | 48 (56.4) <sup>c</sup> |
|                                   | <b>Whole wheat: almost exclusively (%)</b>                         | 11 (6.7)                     | 11 (7.4)               |
|                                   | <b>Meal pattern: 3 meals/day at a regular times (%)</b>            | 94 (57.3)                    | 82 (55.4)              |
|                                   | <b>Brown rice: almost exclusively (%)</b>                          | 21 (12.8)                    | 11 (7.4)               |
| <b>Risk perception</b>            | <b>Causal beliefs</b>                                              |                              |                        |
|                                   | <i>-Perceiving 6 general risk factors as cause (%)<sup>d</sup></i> | 110 (66.7)                   | 103 (69.1)             |
|                                   | <i>-Perceiving consuming a lot of sugar as cause (%)</i>           | 113 (68.5)                   | 105 (70.5)             |
|                                   | <i>-Perceiving consuming a lot of white rice as cause (%)</i>      | 95 (57.6)                    | 86 (57.7)              |
|                                   | <i>-Perceiving consuming masala as cause<sup>d</sup></i>           | 49 (29.9)                    | 48 (32.4)              |
|                                   | <i>-Perceiving being a South Asian as cause</i>                    | 122 (73.9)                   | 104 (69.8)             |
|                                   | <i>-Perceiving having a family history of T2D as cause</i>         | 150 (90.9)                   | 134 (89.9)             |
| <b>Positive attitude towards</b>  | <b>High susceptibility</b>                                         | 63 (38.2)                    | 71 (47.7)              |
|                                   | <b>High controllability belief by physical activity</b>            | 146 (88.5)                   | 132 (88.6)             |
|                                   | <b>Physical activity</b>                                           |                              |                        |
|                                   | <i>-Direct</i>                                                     | 160 (97.0)                   | 143 (96.0)             |

|                                             |                                          |            |                        |
|---------------------------------------------|------------------------------------------|------------|------------------------|
|                                             | <i>-Indirect</i>                         | 161 (97.6) | 142 (95.3)             |
|                                             | <b>Diet</b>                              |            |                        |
|                                             | <i>-In general</i>                       | 161 (98.2) | 148 (99.3)             |
|                                             | <i>-Importance brown rice</i>            | 76 (46.1)  | 62 (41.6)              |
|                                             | <i>-Importance snacks</i>                | 51 (31.5)  | 39 (26.4)              |
|                                             | <i>-Enjoyment brown rice</i>             | 43 (27.0)  | 30 (20.5)              |
|                                             | <i>-Enjoyment snacks</i>                 | 93 (58.1)  | 67 (45.6) <sup>c</sup> |
| <b>Perceiving social support</b>            | <b>Physical activity</b>                 |            |                        |
|                                             | <i>-Partner</i>                          | 71 (43.0)  | 66 (44.3)              |
|                                             | <i>-Others</i>                           | 103 (62.4) | 99 (66.4)              |
|                                             | <b>Diet</b>                              |            |                        |
|                                             | <i>-In general</i>                       | 98 (59.8)  | 85 (57.0)              |
|                                             | <i>-Brown rice</i>                       | 44 (26.8)  | 41 (27.5)              |
|                                             | <i>-Refusing snacks</i>                  | 48 (29.3)  | 45 (30.2)              |
| <b>Perceiving self-efficacy</b>             | <b>Physical activity</b>                 | 109 (66.1) | 103 (69.1)             |
|                                             | <b>Diet</b>                              |            |                        |
|                                             | <i>-In general</i>                       | 151 (91.5) | 136 (91.3)             |
|                                             | <i>-Brown rice</i>                       | 56 (33.9)  | 38 (25.5)              |
|                                             | <i>-Refusing snacks</i>                  | 98 (60.5)  | 101 (69.7)             |
| <b>Stage of change- motivated to change</b> | <b>Physical activity within 6 months</b> | 99 (59.3)  | 105 (69.5)             |
|                                             | <b>Diet within 6 months</b>              |            |                        |
|                                             | <i>-In general</i>                       | 153 (92.7) | 135 (90.6)             |
|                                             | <i>-Brown rice</i>                       | 82 (49.7)  | 59 (39.6)              |

Data are presented as means (95%-confidence interval), median (25th-75th percentile) or *n* (percentage); HOMA-IR, Homeostasis Model of Assessment-Insulin Resistance ; T2D, type 2 diabetes mellitus ; <sup>a</sup> Estimated net income was not reported by 54 (17.0%) of participants. Differences between groups were, therefore, not assessed. <sup>b</sup> Derived from the national guidelines for diet (30), with the exception of rice for which no guideline has been established; <sup>c</sup> Significant difference between the groups at baseline (T0); <sup>d</sup> Six common risk factors: overweight, too little exercise, unhealthy diet, age  $\geq$  35 years, smoking, and hypertension.



Table 2. Effectiveness of intervention on physical activity and dietary behaviour among South Asians at risk of diabetes

|                                   | Changes in intervention group, N=165                    |                    | Changes in control group, N=149 |                       | p-value<br>T2 <sup>c</sup> |       |
|-----------------------------------|---------------------------------------------------------|--------------------|---------------------------------|-----------------------|----------------------------|-------|
|                                   | At T1 <sup>a,b</sup>                                    | At T2 <sup>a</sup> | At T1 <sup>a,b</sup>            | At T2 <sup>a</sup>    |                            |       |
| <b>Physical activity</b>          | <b>Any moderate-to-vigorous activity</b>                |                    |                                 |                       |                            |       |
|                                   | Participants with positive change (%)                   | 22 (17.1)          | 20 (13.4)                       | 18 (14.9)             | 21 (12.7)                  | 0.630 |
|                                   | Participants with negative change (%)                   | 9 (7)              | 10 (6.7)                        | 11 (9.1)              | 16 (9.7)                   |       |
|                                   | <b>Mean moderate-to-vigorous activity (min/week)</b>    | 163.1 (21.5-304.7) | 142.9 (-5.26-291.0)             | -34.3 (-189.6-120.9)  | 0.5 (-149.5-150.6)         | 0.672 |
|                                   | <b>Mean total activity (min/week)</b>                   | 83.1 (-82.9-249.2) | -9.3 (-177.2-158.4)             | -174.8 (-383.2-33.5)* | 2.9 (-197.9-203.7)         | 0.297 |
| <b>Dietary intake<sup>d</sup></b> | <b>Fruit: 2 pieces /day (%)</b>                         |                    |                                 |                       |                            |       |
|                                   | Participants with positive change (%)                   | 20 (15.9)          | 28 (17.1)                       | 16 (13.3)             | 30 (20.3)                  | 0.680 |
|                                   | Participants with negative change (%)                   | 21 (16.7)          | 19 (11.6)                       | 13 (10.8)             | 14 (9.5)                   |       |
|                                   | <b>Vegetables: 200 g/day (%)</b>                        |                    |                                 |                       |                            |       |
|                                   | Participants with positive change (%)                   | 12 (9.3)           | 20 (12.1)                       | 19 (15.8)             | 19 (12.8)                  | 0.787 |
|                                   | Participants with negative change (%)                   | 17 (13.2)          | 17 (10.3)                       | 14 (11.7)             | 12 (8.1)                   |       |
|                                   | <b>Whole wheat: almost exclusively (%)</b>              |                    |                                 |                       |                            |       |
|                                   | Participants with positive change (%)                   | 8 (6.2)            | 25 (15.2)                       | 14 (11.7)             | 20 (13.4)                  | 0.667 |
|                                   | Participants with negative change (%)                   | 7 (5.4)            | 7 (4.2)                         | 11 (9.2)              | 4 (2.7)                    |       |
|                                   | <b>Meal pattern: 3 meals/day at a regular times (%)</b> |                    |                                 |                       |                            |       |
|                                   | Participants with positive change (%)                   | 22 (17.3)          | 32 (19.5)                       | 19 (16.0)             | 26 (17.6)                  | 0.329 |
|                                   | Participants with negative change (%)                   | 12 (9.4)           | 11 (6.7)                        | 7 (5.9)               | 17 (11.5)                  |       |
|                                   | <b>Brown rice: almost exclusively (%)</b>               |                    |                                 |                       |                            |       |
|                                   | Participants with positive change (%)                   | 10 (7.8)           | 12 (7.3)                        | 6 (5.0)               | 19 (12.8)                  | 0.264 |
|                                   | Participants with negative change (%)                   | 7 (5.5)            | 6 (3.7)                         | 5 (4.3)               | 6 (4.0)                    |       |

1  
2  
3  
4  
5 <sup>a</sup>Changes from T0-T1 and T0-T2 are described as number (percentage of total population) with a positive change (e.g. from non-adherent to adherent to the  
6 guideline for fruit intake) or a negative change (e.g. from a regular to an irregular meal pattern) at one and two years. The remaining participants had not  
7 changed their dietary intake or physical activity. For continuous measures a mean change (95%-confidence interval) is given.

8 <sup>b</sup> Of the 314 participants with a measurement at baseline and at 2-year follow-up, 279 also attended the measurement at 1-year follow-up (148 in the  
9 intervention group and 131 in the control group); <sup>c</sup> *P*-value for the intention-to-treat analysis of the difference in changes from T0 to T2 between the two  
10 groups; <sup>d</sup> Derived from the national guidelines for diet (30), with the exception of rice for which no guideline has been established; T0, baseline measurement;  
11 T1, measurement after 1 year; T2, measurement after 2 years.  
12  
13  
14  
15  
16  
17  
18  
19  
20  
21  
22  
23  
24  
25  
26  
27  
28  
29  
30  
31  
32  
33  
34  
35  
36  
37  
38  
39  
40  
41  
42  
43  
44  
45  
46  
47  
48  
49



Table 3. Effectiveness of intervention on determinants of behaviour among South Asians at risk of diabetes (n=314)

|                                  |                                                                    | Changes in intervention group, N=165 |                    | Changes in control group, N=149 |                    | p-value T2 <sup>c</sup> |
|----------------------------------|--------------------------------------------------------------------|--------------------------------------|--------------------|---------------------------------|--------------------|-------------------------|
|                                  |                                                                    | At T1 <sup>a,b</sup>                 | At T2 <sup>a</sup> | At T1 <sup>a,b</sup>            | At T2 <sup>a</sup> |                         |
| <b>Risk perception</b>           | <b>Causal beliefs</b>                                              |                                      |                    |                                 |                    |                         |
|                                  | <i>-Perceiving 6 general risk factors as cause (%)<sup>d</sup></i> |                                      |                    |                                 |                    |                         |
|                                  | Participants with positive change (%)                              | 20 (15.5)                            | 32 (19.4)          | 24 (19.8)                       | 33 (22.1)          | 0.818                   |
|                                  | Participants with negative change (%)                              | 16 (12.4)                            | 16 (9.7)           | 12 (9.9)                        | 13 (8.7)           |                         |
|                                  | <i>-Perceiving consuming a lot of sugar as cause (%)</i>           |                                      |                    |                                 |                    |                         |
|                                  | Participants with positive change (%)                              | 18 (14.1)                            | 21 (12.7)          | 16 (13.2)                       | 18 (12.1)          | 0.458                   |
|                                  | Participants with negative change (%)                              | 32 (25.0)                            | 34 (20.6)          | 16 (13.2)                       | 23 (15.4)          |                         |
|                                  | <i>-Perceiving consuming a lot of white rice as cause (%)</i>      |                                      |                    |                                 |                    |                         |
|                                  | Participants with positive change (%)                              | 25 (19.4)                            | 35 (21.2)          | 33 (27.3)                       | 39 (26.2)          | 0.552                   |
|                                  | Participants with negative change (%)                              | 18 (14.0)                            | 21 (12.7)          | 10 (8.3)                        | 16 (10.7)          |                         |
|                                  | <i>-Perceiving consuming masala as cause<sup>e</sup></i>           |                                      |                    |                                 |                    |                         |
|                                  | Participants with positive change (%)                              | 11 (8.7)                             | 22 (13.4)          | 17 (14.0)                       | 19 (12.8)          | 0.569                   |
|                                  | Participants with negative change (%)                              | 27 (21.3)                            | 29 (17.7)          | 17 (14.0)                       | 20 (13.5)          |                         |
|                                  | <i>-Perceiving being a South Asian as cause</i>                    |                                      |                    |                                 |                    |                         |
|                                  | Participants with positive change (%)                              | 19 (14.7)                            | 24 (14.5)          | 18 (14.9)                       | 30 (20.1)          | 0.395                   |
|                                  | Participants with negative change (%)                              | 13 (10.1)                            | 15 (9.1)           | 12 (9.9)                        | 11 (7.4)           |                         |
|                                  | <i>-Perceiving having a family history of T2D as cause</i>         |                                      |                    |                                 |                    |                         |
|                                  | Participants with positive change (%)                              | 8 (6.2)                              | 12 (7.3)           | 10 (8.3)                        | 12 (8.1)           | 0.798                   |
|                                  | Participants with negative change (%)                              | 9 (7.0)                              | 13 (7.9)           | 4 (3.3)                         | 9 (6.0)            |                         |
|                                  | <b>High susceptibility</b>                                         |                                      |                    |                                 |                    |                         |
|                                  | Participants with positive change (%)                              | 24 (18.6)                            | 37 (22.4)          | 28 (23.1)                       | 32 (21.5)          | 0.941                   |
|                                  | Participants with negative change (%)                              | 11 (8.5)                             | 17 (10.3)          | 17 (14.0)                       | 17 (11.4)          |                         |
|                                  | <b>High controllability belief by physical activity</b>            |                                      |                    |                                 |                    |                         |
|                                  | Participants with positive change (%)                              | 5 (3.9)                              | 15 (9.1)           | 8 (6.6)                         | 12 (8.1)           | 0.619                   |
|                                  | Participants with negative change (%)                              | 7 (5.5)                              | 9 (5.5)            | 8 (6.6)                         | 5 (3.4)            |                         |
| <b>Positive attitude towards</b> | <b>Physical activity</b>                                           |                                      |                    |                                 |                    |                         |
|                                  | <i>-Direct</i>                                                     |                                      |                    |                                 |                    |                         |

|                                  |                                       |           |           |            |           |                    |
|----------------------------------|---------------------------------------|-----------|-----------|------------|-----------|--------------------|
|                                  | Participants with positive change (%) | 3 (2.4)   | 4 (2.4)   | 3 (2.5)    | 4 (2.7)   | 1.0 <sup>f</sup>   |
|                                  | Participants with negative change (%) | 2 (1.6)   | 0 (0.0)   | 1 (0.8)    | 0 (0.0)   |                    |
|                                  | <b>-Indirect</b>                      |           |           |            |           |                    |
|                                  | Participants with positive change (%) | 4 (3.1)   | 4 (2.4)   | 3 (2.5)    | 5 (3.4)   | 0.740 <sup>f</sup> |
|                                  | Participants with negative change (%) | 3 (2.3)   | 6 (3.6)   | 2 (1.7)    | 1 (0.7)   |                    |
|                                  | <b>Diet</b>                           |           |           |            |           |                    |
|                                  | <b>-In general</b>                    |           |           |            |           |                    |
|                                  | Participants with positive change (%) | 2 (1.6)   | 2 (1.2)   | 1 (0.8)    | 1 (0.7)   | 1.0 <sup>f</sup>   |
|                                  | Participants with negative change (%) | 2 (1.6)   | 1 (0.6)   | 2 (1.7)    | 1 (0.7)   |                    |
|                                  | <b>-Importance brown rice</b>         |           |           |            |           |                    |
|                                  | Participants with positive change (%) | 34 (26.4) | 40 (24.2) | 30 (24.8)  | 39 (26.2) | 0.739              |
|                                  | Participants with negative change (%) | 13 (10.1) | 16 (9.7)  | 16 (13.2)  | 11 (7.4)  |                    |
|                                  | <b>-Importance snacks<sup>d</sup></b> |           |           |            |           |                    |
|                                  | Participants with positive change (%) | 18 (14.5) | 20 (12.3) | 20 (16.8)  | 11 (7.4)  | 0.298              |
|                                  | Participants with negative change (%) | 25 (20.2) | 31 (19.1) | 19 (16.0)  | 26 (17.6) |                    |
|                                  | <b>-Enjoyment brown rice</b>          |           |           |            |           |                    |
|                                  | Participants with positive change (%) | 34 (27.6) | 32 (20.4) | 20 (17.2)* | 27 (18.5) | 0.140              |
|                                  | Participants with negative change (%) | 10 (8.1)  | 15 (9.6)  | 7 (6.0)    | 6 (4.1)   |                    |
|                                  | <b>-Enjoyment snacks<sup>d</sup></b>  |           |           |            |           |                    |
|                                  | Participants with positive change (%) | 25 (20.5) | 22 (13.9) | 24 (20.3)  | 19 (12.9) | 0.147              |
|                                  | Participants with negative change (%) | 36 (29.5) | 49 (31.0) | 16 (13.6)  | 32 (21.8) |                    |
| <b>Perceiving social support</b> | <b>Physical activity</b>              |           |           |            |           |                    |
|                                  | <b>-Partner</b>                       |           |           |            |           |                    |
|                                  | Participants with positive change (%) | 18 (14.2) | 28 (17.0) | 13 (10.7)  | 22 (14.8) | 0.730              |
|                                  | Participants with negative change (%) | 13 (10.2) | 16 (9.7)  | 11 (9.1)   | 12 (8.1)  |                    |
|                                  | <b>-Others</b>                        |           |           |            |           |                    |
|                                  | Participants with positive change (%) | 26 (20.3) | 30 (18.2) | 19 (15.7)  | 28 (18.8) | 0.205              |
|                                  | Participants with negative change (%) | 18 (14.1) | 15 (9.1)  | 16 (13.2)  | 23 (15.4) |                    |
|                                  | <b>Diet</b>                           |           |           |            |           |                    |
|                                  | <b>-In general</b>                    |           |           |            |           |                    |
|                                  | Participants with positive change (%) | 21 (16.5) | 28 (17.1) | 19 (16.1)  | 27 (18.1) | 0.090              |
|                                  | Participants with negative change (%) | 21 (15.5) | 35 (21.3) | 27 (22.9)  | 18 (12.1) |                    |
|                                  | <b>-Brown rice</b>                    |           |           |            |           |                    |
|                                  | Participants with positive change (%) | 28 (22.2) | 26 (15.9) | 17 (14.4)  | 31 (20.8) | 0.473              |
|                                  | Participants with negative change (%) | 12 (9.5)  | 24 (14.6) | 22 (18.6)  | 18 (12.1) |                    |

1  
2  
3  
4  
5  
6  
7  
8  
9  
10  
11  
12  
13  
14  
15  
16  
17  
18  
19  
20  
21  
22  
23  
24  
25  
26  
27  
28  
29  
30  
31  
32  
33  
34  
35  
36  
37  
38  
39  
40  
41  
42  
43  
44  
45  
46  
47  
48  
49

|                                            |                                          |           |           |            |           |                    |
|--------------------------------------------|------------------------------------------|-----------|-----------|------------|-----------|--------------------|
|                                            | <b>-Refusing snacks</b>                  |           |           |            |           |                    |
|                                            | Participants with positive change (%)    | 30 (23.6) | 37 (22.6) | 18 (15.1)* | 37 (25.0) | 0.389              |
|                                            | Participants with negative change (%)    | 13 (10.2) | 29 (17.7) | 25 (21.0)  | 18 (12.2) |                    |
| <b>Perceiving self-efficacy</b>            | <b>Physical activity</b>                 |           |           |            |           |                    |
|                                            | Participants with positive change (%)    | 22 (17.2) | 28 (17.0) | 18 (14.9)  | 25 (16.8) | 0.973              |
|                                            | Participants with negative change (%)    | 24 (18.8) | 19 (11.5) | 14 (11.6)  | 16 (10.7) |                    |
|                                            | <b>Diet</b>                              |           |           |            |           |                    |
|                                            | <b>-In general</b>                       |           |           |            |           |                    |
|                                            | Participants with positive change (%)    | 4 (3.1)   | 7 (4.2)   | 7 (5.8)    | 10 (6.7)  | 0.334 <sup>f</sup> |
|                                            | Participants with negative change (%)    | 2 (1.6)   | 3 (1.8)   | 7 (5.8)    | 4 (2.7)   |                    |
|                                            | <b>-Brown rice</b>                       |           |           |            |           |                    |
|                                            | Participants with positive change (%)    | 28 (21.7) | 26 (15.9) | 29 (24.0)  | 27 (18.1) | 0.669              |
|                                            | Participants with negative change (%)    | 22 (17.1) | 20 (12.2) | 13 (10.7)  | 14 (9.4)  |                    |
|                                            | <b>-Refusing snacks</b>                  |           |           |            |           |                    |
|                                            | Participants with positive change (%)    | 25 (20.0) | 40 (24.8) | 25 (21.4)  | 27 (18.9) | 0.359              |
|                                            | Participants with negative change (%)    | 11 (8.8)  | 15 (9.3)  | 14 (12.0)  | 18 (12.6) |                    |
| <b>Stage of change-motivated to change</b> | <b>Physical activity within 6 months</b> |           |           |            |           |                    |
|                                            | Participants with positive change (%)    | 26 (15.8) | 33 (20.0) | 16 (10.7)  | 21 (14.1) | 0.076              |
|                                            | Participants with negative change (%)    | 43 (26.1) | 30 (18.2) | 44 (29.5)  | 18 (12.1) |                    |
|                                            | <b>Diet within 6 months</b>              |           |           |            |           |                    |
|                                            | <b>-In general</b>                       |           |           |            |           |                    |
|                                            | Participants with positive change (%)    | 7 (5.4)   | 7 (4.2)   | 8 (6.6)    | 10 (6.7)  | 0.334 <sup>f</sup> |
|                                            | Participants with negative change (%)    | 1 (0.8)   | 3 (1.8)   | 4 (3.3)    | 4 (2.7)   |                    |
|                                            | <b>-Brown rice</b>                       |           |           |            |           |                    |
|                                            | Participants with positive change (%)    | 22 (17.2) | 21 (12.7) | 23 (19.0)  | 26 (17.4) | 0.266              |
|                                            | Participants with negative change (%)    | 13 (10.2) | 30 (18.2) | 17 (14.0)  | 19 (12.8) |                    |

<sup>a</sup> Changes from T0-T1 and T0-T2 are described as number (percentage of total population) with a positive change (e.g. from non-adherent to adherent to the guideline for fruit intake) or a negative change (e.g. from a regular to an irregular meal pattern) at one and two years. The remaining participants had not changed their dietary intake or physical activity. <sup>b</sup> Of the 314 participants with a measurement at baseline and at 2-year follow-up, 279 also attended the measurement at 1-year follow-up (148 in the intervention group and 131 in the control group); <sup>c</sup> P-value for the intention-to-treat analysis of the difference in changes from T0 to T2 between the intervention and control group; <sup>d</sup> Six common risk factors: overweight, too little exercise, unhealthy diet, age ≥ 35 years, smoking, and hypertension; <sup>e</sup> Except for the belief that masala intake is a possible cause of diabetes and the attitude towards refusing snacks at parties, an increase or positive change in the items measuring the determinants of behaviour change was expected to positively influence behaviour change; <sup>f</sup> Because of low expected counts, a Fisher's exact test or chi-square test was done comparing the category positive change versus the rest; T0, baseline measurement; T1, measurement after 1 year; T2, measurement after 2 years; T2D, Type 2 diabetes mellitus.

1  
2  
3 **Figure 1.** Flow chart of inclusion of the study participants  
4

5 \*A fasting glucose of 5.5 mmol/L or lower, a 2-hour post-load glucose of 7.7 mmol/L or lower, a  
6 glycated haemoglobin level of 5.9% or lower and a value of 2.38 or lower for the homeostasis model  
7 assessment of estimated insulin resistance; \*\* a fasting glucose of 7.0 mmol/L or more, and/or a 2-  
8 hour post-load glucose of 11.1 mmol/L or more; RCT, randomized controlled trial; PA, physical  
9 activity; T0, baseline measurement; T2, measurement at 2-year follow-up  
10  
11  
12  
13  
14  
15  
16  
17  
18  
19  
20  
21  
22  
23  
24  
25  
26  
27  
28  
29  
30  
31  
32  
33  
34  
35  
36  
37  
38  
39  
40  
41  
42  
43  
44  
45  
46  
47  
48  
49  
50  
51  
52  
53  
54  
55  
56  
57  
58  
59  
60

For peer review only

Figure 1- Flow chart of the study

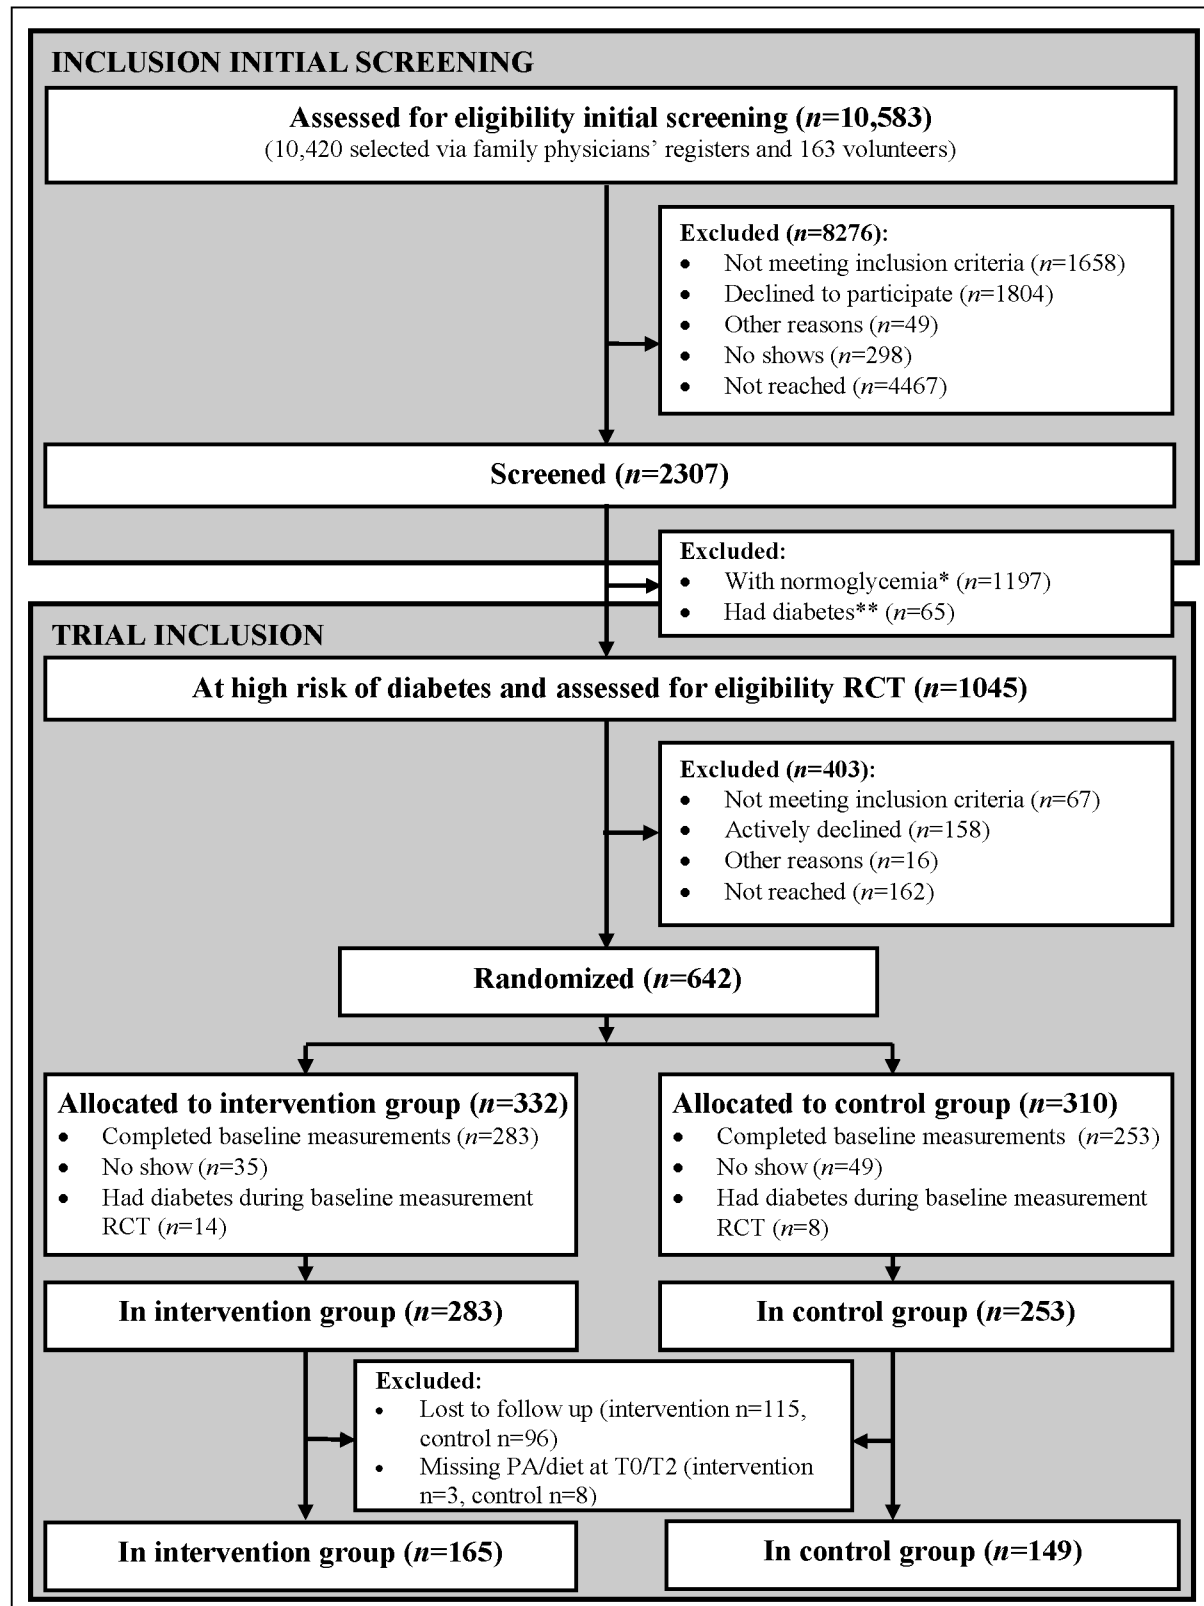

## Supplement 1. Questionnaire

Below are the questions on dietary behavior (in Dutch) from the questionnaire at baseline, T1, T2 of the DHIAAN study. Participants were interviewed by a trained interviewer. Answer cards with the answer categories for each question were provided.

### 1. Risicoperceptie

Allereerst volgen er een aantal vragen over het risico op diabetes. Ik lees steeds een situatie voor en kunt u antwoorden of deze situatie uw risico op diabetes verhoogt of niet verhoogt?

Als u het niet weet, kunt u dat ook zeggen.

**INT Als verhoogd risico onduidelijk is, dan aangeven dat dit hetzelfde is als meer kans**

1.1

| Heeft u een verhoogd risico op diabetes als u:     | Ja                       | Weet niet                | Nee                      |
|----------------------------------------------------|--------------------------|--------------------------|--------------------------|
| Van Hindostaans-Surinaamse afkomst bent?           | <input type="checkbox"/> | <input type="checkbox"/> | <input type="checkbox"/> |
| Veel witte rijst eet?                              | <input type="checkbox"/> | <input type="checkbox"/> | <input type="checkbox"/> |
| Weinig beweegt?                                    | <input type="checkbox"/> | <input type="checkbox"/> | <input type="checkbox"/> |
| Ongezond eet?                                      | <input type="checkbox"/> | <input type="checkbox"/> | <input type="checkbox"/> |
| Familie heeft met diabetes?                        | <input type="checkbox"/> | <input type="checkbox"/> | <input type="checkbox"/> |
| Ouder dan 35 jaar bent?                            | <input type="checkbox"/> | <input type="checkbox"/> | <input type="checkbox"/> |
| Een hoge bloeddruk heeft?                          | <input type="checkbox"/> | <input type="checkbox"/> | <input type="checkbox"/> |
| Rookt?                                             | <input type="checkbox"/> | <input type="checkbox"/> | <input type="checkbox"/> |
| In het verleden zwangerschapsdiabetes heeft gehad? | <input type="checkbox"/> | <input type="checkbox"/> | <input type="checkbox"/> |
| Veel masala eet?                                   | <input type="checkbox"/> | <input type="checkbox"/> | <input type="checkbox"/> |
| Overgewicht heeft?                                 | <input type="checkbox"/> | <input type="checkbox"/> | <input type="checkbox"/> |
| Veel suiker eet?                                   | <input type="checkbox"/> | <input type="checkbox"/> | <input type="checkbox"/> |

**Bent u het eens of oneens met de volgende stellingen. Misschien vindt u deze stellingen op elkaar lijken, maar geef toch elke keer het antwoord dat u het meest van u op toepassing vindt.**

**INT: Gebruik antwoordkaart 1 voor vragen 1.2 t/m 1.4**

1.2 Het is aannemelijk dat ik diabetes zal krijgen

- Helemaal mee eens  
 Mee eens  
 Niet mee eens/Niet mee oneens  
 Niet mee eens  
 Helemaal niet mee eens

1.3 Mijn kans op het krijgen van diabetes in de komende paar jaren is groot

- Helemaal mee eens  
 Mee eens  
 Niet mee eens/Niet mee oneens  
 Niet mee eens  
 Helemaal niet mee eens

1  
2  
3 1.4 Ik heb het gevoel dat ik ooit in mijn  
4 leven diabetes zal krijgen

- Helemaal mee eens  
 Mee eens  
 Niet mee eens/Niet mee oneens  
 Niet mee eens  
 Helemaal niet mee eens

## 6. Voeding 1

16  
17 *De volgende vragen gaan over uw huidige eetpatroon.*

18  
19 6.1 Hoeveel dagen van de week eet u fruit?

Elke dag, 7 keer per week

20 **INT** **Het gaat hierbij niet alleen om vers fruit,**  
21 **ook fruit uit blik of glas tellen mee**

5 of 6 dagen per week

4 dagen per week of  
22 minder

23  
24  
25 6.2 Hoeveel fruit eet u dan per dag?

2 stuks fruit of meer per

26 dag

27  
28 **INT** **Als één stuk fruit telt 1 (sinaas)appel, 1 banaan**  
29 **2 mandarijnen of een schaalpje kleiner fruit**  
30 **zoals aardbeien. Het gaat niet alleen om vers fruit,**  
31 **ook fruit uit blik of glas tellen mee.**

1 stuks fruit per dag

ik eet (bijna) nooit fruit

32  
33  
34 6.3 Hoe vaak drinkt u vruchtensappen, vers of uit pak of fles?  
35 Siroop moet u niet meetellen.

Vaak (dagelijks)

Soms

Nooit (< 1 keer per week)

36  
37  
38 6.4 Hoe vaak eet u, tussendoor of bij uw maaltijd rauwkost  
39 of salade?

6 – 7 keer per week

3 – 5 keer per week

1-2 keer per week of  
40 minder

41  
42  
43 6.5 Hoeveel dagen van de week eet u groenten?

Elke dag, 7 keer per  
44 week

45  
46 **INT** **Alle groenten tellen mee, ook voorgesneden groenten,**  
47 **Diepvriesgroenten en groenten uit pot of blik.**

5 of 6 dagen per week

4 dagen per week of  
48 minder

49  
50 **(Bij deze vraag telt rauwkost niet mee)**

(Bijna) nooit

51  
52  
53 6.6 Hoe vaak per week eet u een ochtendmaaltijd (ontbijt)?

6 – 7 keer per week

3 – 5 keer per week

1 – 2 keer per week

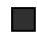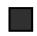

1  
2  
3  
4  
5  
6  
7  
8  
9  
10  
11  
12  
13  
14  
15  
16  
17  
18  
19  
20  
21  
22  
23  
24  
25  
26  
27  
28  
29  
30  
31  
32  
33  
34  
35  
36  
37  
38  
39  
40  
41  
42  
43  
44  
45  
46  
47  
48  
49  
50  
51  
52  
53  
54  
55  
56  
57  
58  
59  
60

Nooit, ik eet geen  
ochtendmaaltijd (ontbijt)

6.7 Hoe vaak per week eet u een middagmaaltijd (lunch)?

6 – 7 keer per week  
 3 – 5 keer per week  
 1 – 2 keer per week  
 Nooit, ik eet geen  
middagmaaltijd (lunch)

6.8 Hoe ziet uw maaltijdpatroon er op een dag uit?

Regelmatig maaltijdpatroon  
(ontbijt, lunch, avondmaaltijd)  
 Vast maaltijdpatroon  
(alleen lunch en avondmaaltijd)  
 Onregelmatig maaltijdpatroon  
(soms ontbijt, lunch, avondmaaltijd)

6.9 Hoe vaak per week eet u rijst?

6 – 7 keer per week  
 3 – 5 keer per week  
 1 – 2 keer per week  
 < 1 keer per week / (bijna) nooit

6.10 Welk soort rijst eet u?

Altijd witte rijst  
 Meestal witte rijst, af en toe zilvervliesrijst  
 Even vaak witte rijst als zilvervliesrijst  
 Meestal zilvervliesrijst, af en toe witte rijst  
 Altijd zilvervliesrijst  
 Ik eet (bijna) nooit rijst

6.11 Hoe vaak per week eet u brood zoals:  
sneetjes brood, puntjes, broodjes, bolletjes  
en broodvervangers beschuit, crackers, rijstwafels?

6 – 7 keer per week  
 3 – 5 keer per week  
 1 – 2 keer per week  
 < 1 keer per week / (bijna) nooit

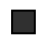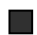



6.12 Als u brood of broodvervangers eet, welke soorten waren dat dan?

**INT: Gebruik Antwoordkaart 8**

|                                                               | Nooit                    | Soms                     | Vaak                     | Altijd                   | Weet niet                |
|---------------------------------------------------------------|--------------------------|--------------------------|--------------------------|--------------------------|--------------------------|
| 'Gewone' knäckebröd, beschuit, matzes, crackers of rijstwafel | <input type="checkbox"/> |
| Volkoren knäckebröd, beschuit, matzes of crackers             | <input type="checkbox"/> |
| Croissant                                                     | <input type="checkbox"/> |
| Witte krenten-, rozijnen-, muesli- bolletjes                  | <input type="checkbox"/> |
| Volkoren krenten-, rozijnen-, mueslibolletjes                 | <input type="checkbox"/> |
| Wit brood                                                     | <input type="checkbox"/> |
| Rogge-, volkoren- of mueslibrood                              | <input type="checkbox"/> |
| Bruin brood                                                   | <input type="checkbox"/> |
| 'gewone' ontbijtkoek                                          | <input type="checkbox"/> |
| Volkoren ontbijtkoek                                          | <input type="checkbox"/> |

**INT** Als respondent niet weet of hij/zij een volkoren of gewoon brood of broodvervanger eet, dan aangeven dat 'witte' of 'gewone' producten het meest standaard zijn. Als respondent het dan echt niet weet → weet niet invullen.

6.13 Bent uw binnen uw huishouden verantwoordelijk voor het bereiden van de warme maaltijd?

- Altijd  
 Meestal  
 Af en toe  
 Bijna nooit  
 Nooit

## 7. Voeding 2

**De volgende vragen gaan over hoe belangrijk of onbelangrijk u voeding en bepaalde aspecten van voeding vindt.**

7.1 Hoe belangrijk is het eten van gezonde voeding voor u?

Heel belangrijk

Belangrijk

Niet belangrijk/niet onbelangrijk

Niet belangrijk

Totaal niet belangrijk

**INT: Gebruik Antwoordkaart 9**

*Ik ga nu een aantal van de aanbevelingen van het Voedingscentrum noemen. Misschien bent u ermee bekend. Allereerst is, volgens het Voedingscentrum, dagelijks 3 hoofdmaaltijden en maximaal 4 keer tussendoor eten het meest optimaal. Daarnaast adviseert het Voedingscentrum om tenminste twee ons groente en twee stuks fruit per dag te eten. Tot slot is het belangrijk voldoende voedingsvezel te eten. Dit kan, onder andere, door de voorkeur te geven aan volkoren brood en zilvervliesrijst in plaats van wit brood en witte rijst.*

**INT Dus: Volkoren producten zijn bijvoorbeeld bruin brood i.p.v. wit brood of roti van volkoren bloem i.p.v. witte bloem**

**Bij de volgende vragen willen we weten hoe belangrijk of onbelangrijk u de bovengenoemde adviezen vindt.**

7.2

**INT: Gebruik Antwoordkaart 9**

| Stelling                                                                                           | Heel belangrijk          | Belangrijk               | Niet belangrijk/<br>Niet onbelangrijk | Niet belangrijk          | Totaal niet belangrijk   |
|----------------------------------------------------------------------------------------------------|--------------------------|--------------------------|---------------------------------------|--------------------------|--------------------------|
| Het dagelijks eten van een ontbijt, vind ik..                                                      | <input type="checkbox"/> | <input type="checkbox"/> | <input type="checkbox"/>              | <input type="checkbox"/> | <input type="checkbox"/> |
| Het regelmatig eten, dat wil zeggen 3 keer per dag een maaltijd, vind ik (ontbijt + lunch + diner) | <input type="checkbox"/> | <input type="checkbox"/> | <input type="checkbox"/>              | <input type="checkbox"/> | <input type="checkbox"/> |
| Elke dag 2 ons groente eten vind ik                                                                | <input type="checkbox"/> | <input type="checkbox"/> | <input type="checkbox"/>              | <input type="checkbox"/> | <input type="checkbox"/> |
| Elke dag 2 stuks fruit eten vind ik                                                                | <input type="checkbox"/> | <input type="checkbox"/> | <input type="checkbox"/>              | <input type="checkbox"/> | <input type="checkbox"/> |
| Het eten van zilvervliesrijst, vind ik                                                             | <input type="checkbox"/> | <input type="checkbox"/> | <input type="checkbox"/>              | <input type="checkbox"/> | <input type="checkbox"/> |

## 7.2 vervolg

| Stelling                                                                | Heel belangrijk          | Belangrijk               | Niet belangrijk/<br>Niet onbelangrijk | Niet belangrijk          | Totaal niet belangrijk   | N.v.t.*                  |
|-------------------------------------------------------------------------|--------------------------|--------------------------|---------------------------------------|--------------------------|--------------------------|--------------------------|
| Het eten van volkoren producten, vind ik                                | <input type="checkbox"/> | <input type="checkbox"/> | <input type="checkbox"/>              | <input type="checkbox"/> | <input type="checkbox"/> | -                        |
| Elk hapje aannemen bij feestjes en/of religieuze bijeenkomsten, vind ik | <input type="checkbox"/> | <input type="checkbox"/> | <input type="checkbox"/>              | <input type="checkbox"/> | <input type="checkbox"/> | <input type="checkbox"/> |

\* INT: N.v.t. Alleen invullen als resp. nooit naar een feestje en religieuze bijeenkomst gaat.

*Ik noem opnieuw dezelfde aspecten uit de voeding. Wilt u nu aangeven of dit plezierig of onplezierig vindt om te doen?*

INT: Gebruik Antwoordkaart 10

## 7.3

| Stelling                                                                 | Plezierig                | Een beetje plezierig     | Niet plezierig/<br>niet onplezierig | Een beetje onplezierig   | Onplezierig              | N.v.t.*                  |
|--------------------------------------------------------------------------|--------------------------|--------------------------|-------------------------------------|--------------------------|--------------------------|--------------------------|
| Het dagelijks eten van een ontbijt, vind ik                              | <input type="checkbox"/> | <input type="checkbox"/> | <input type="checkbox"/>            | <input type="checkbox"/> | <input type="checkbox"/> | -                        |
| Het regelmatig eten, dat wil zeggen 3 keer per dag een maaltijd, vind ik | <input type="checkbox"/> | <input type="checkbox"/> | <input type="checkbox"/>            | <input type="checkbox"/> | <input type="checkbox"/> | -                        |
| Elke dag 2 ons groente eten, vind ik                                     | <input type="checkbox"/> | <input type="checkbox"/> | <input type="checkbox"/>            | <input type="checkbox"/> | <input type="checkbox"/> | -                        |
| Elke dag 2 stuks fruit eten, vind ik                                     | <input type="checkbox"/> | <input type="checkbox"/> | <input type="checkbox"/>            | <input type="checkbox"/> | <input type="checkbox"/> | -                        |
| Het eten van zilvervliesrijst, vind ik                                   | <input type="checkbox"/> | <input type="checkbox"/> | <input type="checkbox"/>            | <input type="checkbox"/> | <input type="checkbox"/> | -                        |
| Het eten van volkoren producten, vind ik                                 | <input type="checkbox"/> | <input type="checkbox"/> | <input type="checkbox"/>            | <input type="checkbox"/> | <input type="checkbox"/> | -                        |
| Elk hapje aannemen bij feestjes en/of religieuze bijeenkomsten, vind ik  | <input type="checkbox"/> | <input type="checkbox"/> | <input type="checkbox"/>            | <input type="checkbox"/> | <input type="checkbox"/> | <input type="checkbox"/> |

\* INT: N.v.t. Alleen invullen als resp. nooit naar een feestje en religieuze bijeenkomst gaat. De volgende uitspraken gaan over uw familieleden en of zij u stimuleren om gezonde voeding te eten. Ik ga nu verschillende elementen uit de voeding opnemen, kunt u mij zeggen hoe vaak familieleden u stimuleren om dat te doen? Ik bedoel hiermee familieleden die voor u belangrijk zijn en die u regelmatig ziet of spreekt.

INT: Gebruik Antwoordkaart 11

7.4

| Wordt u gestimuleerd door familieleden om..                    | Ja, heel vaak            | Ja, vaak                 | Ja, af en toe            | Nee, bijna nooit         | Nee, nooit               | N.v.t.*                  |
|----------------------------------------------------------------|--------------------------|--------------------------|--------------------------|--------------------------|--------------------------|--------------------------|
| Iedere dag te ontbijten?                                       | <input type="checkbox"/> | -                        |
| Regelmatig te eten (d.w.z. 3 hoofdmaaltijden per dag)?         | <input type="checkbox"/> | -                        |
| Meer groente te eten?                                          | <input type="checkbox"/> | -                        |
| Meer fruit te eten?                                            | <input type="checkbox"/> | -                        |
| Vaker zilvervliesrijst i.p.v. witte rijst te eten?             | <input type="checkbox"/> | -                        |
| vaker volkoren producten te eten?                              | <input type="checkbox"/> | -                        |
| Hapjes af te slaan bij feestjes en/of religieuze bijeenkomsten | <input type="checkbox"/> |

\* INT: N.v.t. Alleen invullen als resp. nooit naar een feestje en religieuze bijeenkomst gaat.

De volgende vragen gaan over een aantal elementen uit de voeding. Kunt u bij de volgende aspecten aangeven in hoeverre het u het zou lukken als u vanaf vandaag dit aspect van voeding wilt verbeteren om dat ook op iedere dag te doen.

Met iedere dag bedoelen we 7 dagen in de week.

INT: Gebruik Antwoordkaart 12

7.5

| Lukt het u om..                                                | Lukt me zeker wel        | Dat lukt me waarschijnlijk wel | Dat lukt misschien wel/ misschien niet | Dat lukt me waarschijnlijk niet | Dat lukt me zeker niet   | N.v.t.*                  |
|----------------------------------------------------------------|--------------------------|--------------------------------|----------------------------------------|---------------------------------|--------------------------|--------------------------|
| Iedere dag te ontbijten                                        | <input type="checkbox"/> | <input type="checkbox"/>       | <input type="checkbox"/>               | <input type="checkbox"/>        | <input type="checkbox"/> | -                        |
| Ik eet regelmatig (dat wil zeggen 3 hoofdmaaltijden per dag)   | <input type="checkbox"/> | <input type="checkbox"/>       | <input type="checkbox"/>               | <input type="checkbox"/>        | <input type="checkbox"/> | -                        |
| Iedere dag 2 ons groenten te eten                              | <input type="checkbox"/> | <input type="checkbox"/>       | <input type="checkbox"/>               | <input type="checkbox"/>        | <input type="checkbox"/> | -                        |
| Iedere dag 2 stuks fruit te eten                               | <input type="checkbox"/> | <input type="checkbox"/>       | <input type="checkbox"/>               | <input type="checkbox"/>        | <input type="checkbox"/> | -                        |
| zilvervliesrijst i.p.v. witte rijst te eten                    | <input type="checkbox"/> | <input type="checkbox"/>       | <input type="checkbox"/>               | <input type="checkbox"/>        | <input type="checkbox"/> | -                        |
| volkorenproducten i.p.v. witte producten te eten               | <input type="checkbox"/> | <input type="checkbox"/>       | <input type="checkbox"/>               | <input type="checkbox"/>        | <input type="checkbox"/> | -                        |
| Hapjes af te slaan bij feestjes en/of religieuze bijeenkomsten | <input type="checkbox"/> | <input type="checkbox"/>       | <input type="checkbox"/>               | <input type="checkbox"/>        | <input type="checkbox"/> | <input type="checkbox"/> |

\* INT: N.v.t. Alleen invullen als resp. nooit naar een feestje en religieuze bijeenkomst gaat.

De volgende vraag gaat over wat u in de toekomst van plan bent met betrekking tot uw voeding. Hierna lees ik enkele uitspraken op die daar mee te maken hebben. Kunt u zeggen welke uitspraak het beste bij u past?

INT: Gebruik Antwoordkaart 13

7.6 Ik noem nu enkele stellingen op. Kunt u steeds aangeven welke antwoordoptie het beste bij u past?

|                                                              | Ja,<br>al 6<br>maanden<br>of langer | Ja,<br>Sinds kort<br>(minder dan<br>6 maanden) | Nee,<br>Maar van plan<br>binnen 1<br>maand te gaan<br>doen | Nee,<br>Maar van plan<br>binnen 6<br>maanden te<br>gaan doen | Nee,<br>Ook niet van<br>plan |
|--------------------------------------------------------------|-------------------------------------|------------------------------------------------|------------------------------------------------------------|--------------------------------------------------------------|------------------------------|
|                                                              | <i>JA &gt;6<br/>maanden</i>         | <i>JA &lt; 6<br/>maanden</i>                   | <i>NEE, maar wel<br/>&lt;1 maand</i>                       | <i>NEE, maar wel<br/>&lt;6 maanden</i>                       | <i>NEE</i>                   |
| Ik ontbijt iedere dag                                        | <input type="checkbox"/>            | <input type="checkbox"/>                       | <input type="checkbox"/>                                   | <input type="checkbox"/>                                     | <input type="checkbox"/>     |
| Ik eet regelmatig (dat wil zeggen 3 hoofdmaaltijden per dag) | <input type="checkbox"/>            | <input type="checkbox"/>                       | <input type="checkbox"/>                                   | <input type="checkbox"/>                                     | <input type="checkbox"/>     |
| Ik eet iedere dag 2 ons groente                              | <input type="checkbox"/>            | <input type="checkbox"/>                       | <input type="checkbox"/>                                   | <input type="checkbox"/>                                     | <input type="checkbox"/>     |
| Ik eet iedere dag 2 stuks fruit                              | <input type="checkbox"/>            | <input type="checkbox"/>                       | <input type="checkbox"/>                                   | <input type="checkbox"/>                                     | <input type="checkbox"/>     |
| Ik eet zilvervliesrijst i.p.v witte rijst                    | <input type="checkbox"/>            | <input type="checkbox"/>                       | <input type="checkbox"/>                                   | <input type="checkbox"/>                                     | <input type="checkbox"/>     |
| Ik eet volkorenproducten i.p.v. witte producten              | <input type="checkbox"/>            | <input type="checkbox"/>                       | <input type="checkbox"/>                                   | <input type="checkbox"/>                                     | <input type="checkbox"/>     |

**SUPPLEMENT 2. Comparison of baseline characteristics, physical activity, dietary behaviour and motivational stage of participants in the present analysis and those who were excluded**

|                                                                                       | <b>In present analysis</b> | <b>Excluded</b>            | <b>p-value</b> |
|---------------------------------------------------------------------------------------|----------------------------|----------------------------|----------------|
|                                                                                       | <b>(N=314)</b>             | <b>(N=222)</b>             |                |
| <b>Male</b>                                                                           | 152 (48.6)                 | 112 (50.5)                 | 0.667          |
| <b>Mean age (years)</b>                                                               | 44.8 (43.6-46.0)           | 41.6 (40.2-43.0)           | <b>0.001</b>   |
| <b>Low education</b>                                                                  | 36 (11.8)                  | 25 (11.6)                  | 0.925          |
| <b>Family history of diabetes</b>                                                     | 227 (74.7)                 | 171 (78.4)                 | 0.318          |
| <b>Mean body mass index</b>                                                           | 27.3 (27.0-27.9)           | 27.4 (26.7-27.9)           | 0.889          |
| <b>Mean fasting plasma glucose</b>                                                    | 5.3 (5.2-5.4)              | 5.3 (5.2-5.4)              | 0.803          |
| <b>Mean 2-h post-load glucose</b>                                                     | 6.0 (5.8-6.2)              | 6.0 (5.8-6.3)              | 0.907          |
| <b>Mean glycated haemoglobin</b>                                                      | 5.7 (5.6-5.7)              | 5.6 (5.6-5.7)              | 0.092          |
| <b>Median HOMA-IR</b>                                                                 | 3.0 (2.2-4.0)              | 3.2 (2.4-4.4)              | <b>0.048</b>   |
| <b>Mean total activity (min/week)</b>                                                 | 2600.8 (2473.5-<br>2728.0) | 2663.6 (2497.8-<br>2829.3) | 0.490          |
| <b>Fruit: 2 pieces /day</b>                                                           | 126 (40.3)                 | 97 (46.2)                  | 0.179          |
| <b>Vegetables: 200 g/day</b>                                                          | 196 (62.4)                 | 131 (62.4)                 | 0.993          |
| <b>Whole wheat: almost exclusively</b>                                                | 22 (7.0)                   | 11 (5.2)                   | 0.414          |
| <b>Meal pattern: 3 meals/day at<br/>regular times</b>                                 | 176 (56.4)                 | 103 (49.0)                 | 0.098          |
| <b>Brown rice: almost exclusively</b>                                                 | 32 (10.2)                  | 24 (11.5)                  | 0.649          |
| <b>Stage of change- motivated to<br/>change physical activity within 6<br/>months</b> | 204 (65.0)                 | 148 (66.7)                 | 0.683          |
| <b>Stage of change: motivated to<br/>change diet within 6 months</b>                  | 288 (91.7)                 | 188 (90.0)                 | 0.489          |

1  
2  
3 Data are presented as means (95%-confidence interval), median (interquartile range) or *n* (percentage);  
4

5 HOMA-IR, Homeostasis Model of Assessment-Insulin Resistance.  
6  
7  
8  
9  
10  
11  
12  
13  
14  
15  
16  
17  
18  
19  
20  
21  
22  
23  
24  
25  
26  
27  
28  
29  
30  
31  
32  
33  
34  
35  
36  
37  
38  
39  
40  
41  
42  
43  
44  
45  
46  
47  
48  
49  
50  
51  
52  
53  
54  
55  
56  
57  
58  
59  
60

For peer review only



Checklist of Items for Reporting Trials of Nonpharmacologic Treatments\*

| Section                    | Item | Standard CONSORT Description                                                                                                                                                              | Extension for Nonpharmacologic Trials                                                                                                                                       | Reported on Page No.     |
|----------------------------|------|-------------------------------------------------------------------------------------------------------------------------------------------------------------------------------------------|-----------------------------------------------------------------------------------------------------------------------------------------------------------------------------|--------------------------|
| <b>Title and abstract†</b> | 1    | How participants were allocated to interventions (e.g., “random allocation,” “randomized,” or “randomly assigned”)                                                                        | In the abstract, description of the experimental treatment, comparator, care providers, centers, and blinding status                                                        | 1-2                      |
| <b>Introduction</b>        |      |                                                                                                                                                                                           |                                                                                                                                                                             |                          |
| Background                 | 2    | Scientific background and explanation of rationale                                                                                                                                        |                                                                                                                                                                             | 4                        |
| <b>Methods</b>             |      |                                                                                                                                                                                           |                                                                                                                                                                             |                          |
| Participants†              | 3    | Eligibility criteria for participants and the settings and locations where the data were collected                                                                                        | When applicable, eligibility criteria for centers and those performing the interventions                                                                                    | 6-7                      |
| Interventions†             | 4    | Precise details of the interventions intended for each group and how and when they were actually administered                                                                             | Precise details of both the experimental treatment and comparator                                                                                                           | 8-9                      |
|                            | 4A   |                                                                                                                                                                                           | Description of the different components of the interventions and, when applicable, descriptions of the procedure for tailoring the interventions to individual participants | 8-9                      |
|                            | 4B   |                                                                                                                                                                                           | Details of how the interventions were standardized                                                                                                                          | 8-9                      |
|                            | 4C   |                                                                                                                                                                                           | Details of how adherence of care providers with the protocol was assessed or enhanced                                                                                       | 8                        |
| Objectives                 | 5    | Specific objectives and hypotheses                                                                                                                                                        |                                                                                                                                                                             | 5                        |
| Outcomes                   | 6    | Clearly defined primary and secondary outcome measures and, when applicable, any methods used to enhance the quality of measurements (e.g., multiple observations, training of assessors) |                                                                                                                                                                             | 9-13                     |
| Sample size†               | 7    | How sample size was determined and, when applicable, explanation of any interim analyses and stopping rules                                                                               | When applicable, details of whether and how the clustering by care providers or centers was addressed                                                                       | Reference trial protocol |

1  
2  
3  
4  
5  
6  
7  
8  
9  
10  
11  
12  
13  
14  
15  
16  
17  
18  
19  
20  
21  
22  
23  
24  
25  
26  
27  
28  
29  
30  
31  
32  
33  
34  
35  
36  
37  
38  
39  
40  
41  
42  
43  
44  
45  
46  
47  
48  
49

|                                        |             |                                                                                                                                                                                                                                                                                                                                        |                                                                                                                                                              |                          |
|----------------------------------------|-------------|----------------------------------------------------------------------------------------------------------------------------------------------------------------------------------------------------------------------------------------------------------------------------------------------------------------------------------------|--------------------------------------------------------------------------------------------------------------------------------------------------------------|--------------------------|
| Randomization–<br>sequence generation† | 8           | Method used to generate the random allocation sequence, including details of any restriction (e.g., blocking, stratification)                                                                                                                                                                                                          | When applicable, how care providers were allocated to each trial group                                                                                       | 7                        |
| Allocation concealment                 | 9           | Method used to implement the random allocation sequence (e.g., numbered containers or central telephone), clarifying whether the sequence was concealed until interventions were assigned                                                                                                                                              |                                                                                                                                                              | 7                        |
| Implementation                         | 10          | Who generated the allocation sequence, who enrolled participants, and who assigned participants to their groups                                                                                                                                                                                                                        |                                                                                                                                                              | 7, references            |
| Blinding (masking)†                    | 11A         | Whether or not participants, those administering the interventions, and those assessing the outcomes were blinded to group assignment                                                                                                                                                                                                  | Whether or not those administering co-interventions were blinded to group assignment                                                                         | 7                        |
|                                        | 11B         |                                                                                                                                                                                                                                                                                                                                        | If blinded, method of blinding and description of the similarity of interventions†                                                                           |                          |
| Statistical methods†                   | 12          | Statistical methods used to compare groups for primary outcome(s); methods for additional analyses, such as subgroup analyses and adjusted analyses                                                                                                                                                                                    | When applicable, details of whether and how the clustering by care providers or centers was addressed                                                        | 14-15                    |
| <b>Results</b>                         |             |                                                                                                                                                                                                                                                                                                                                        |                                                                                                                                                              |                          |
| Participant flow†                      | 13          | Flow of participants through each stage (a diagram is strongly recommended)--- specifically, for each group, report the numbers of participants randomly assigned, receiving intended treatment, completing the study protocol, and analyzed for the primary outcome; describe deviations from study as planned, together with reasons | The number of care providers or centers performing the intervention in each group and the number of patients treated by each care provider or in each center | Figure 1, trial protocol |
| Implementation of<br>intervention†     | New<br>item |                                                                                                                                                                                                                                                                                                                                        | Details of the experimental treatment and comparator as they were implemented                                                                                | 16                       |
| Recruitment                            | 14          | Dates defining the periods of recruitment and follow-up                                                                                                                                                                                                                                                                                |                                                                                                                                                              | 6,14                     |
| Baseline data†                         | 15          | Baseline demographic and clinical characteristics of each group                                                                                                                                                                                                                                                                        | When applicable, a description of care providers (case volume, qualification, expertise, etc.) and centers (volume) in each group                            | Table1,<br>supplement 1  |

|                         |    |                                                                                                                                                                                                           |                                                                                                                                                                       |               |
|-------------------------|----|-----------------------------------------------------------------------------------------------------------------------------------------------------------------------------------------------------------|-----------------------------------------------------------------------------------------------------------------------------------------------------------------------|---------------|
| Numbers analyzed        | 16 | Number of participants (denominator) in each group included in each analysis and whether analysis was by “intention-to-treat”; state the results in absolute numbers when feasible (e.g., 10/20, not 50%) |                                                                                                                                                                       | 13            |
| Outcomes and estimation | 17 | For each primary and secondary outcome, a summary of results for each group and the estimated effect size and its precision (e.g., 95% confidence interval)                                               |                                                                                                                                                                       | 16,17, tables |
| Ancillary analyses      | 18 | Address multiplicity by reporting any other analyses performed, including subgroup analyses and adjusted analyses, indicating those prespecified and those exploratory                                    |                                                                                                                                                                       | 15            |
| Adverse events          | 19 | All important adverse events or side effects in each intervention group                                                                                                                                   |                                                                                                                                                                       | na            |
| <b>Discussion</b>       |    |                                                                                                                                                                                                           |                                                                                                                                                                       |               |
| Interpretation†         | 20 | Interpretation of the results, taking into account study hypotheses, sources of potential bias or imprecision, and the dangers associated with multiplicity of analyses and outcomes                      | In addition, take into account the choice of the comparator, lack of or partial blinding, and unequal expertise of care providers or centers in each group            | 18-19         |
| Generalizability†       | 21 | Generalizability (external validity) of the trial findings                                                                                                                                                | Generalizability (external validity) of the trial findings according to the intervention, comparators, patients, and care providers and centers involved in the trial | 18,21         |
| Overall evidence        | 22 | General interpretation of the results in the context of current evidence                                                                                                                                  |                                                                                                                                                                       | 22            |

\*Additions or modifications to the CONSORT checklist. CONSORT = Consolidated Standards of Reporting Trials.

†This item was modified in the 2007 revised version of the CONSORT checklist.
