# Supplementary material for: Effectiveness of a targeted lifestyle intervention in primary care on diet and physical activity among South Asians at risk for diabetes: 2-year results of a randomised controlled trial in the Netherlands
Source: PubMed Central journal article supplement — BMJ Open. 2017 Jul 2;7(6):e012221. doi: 10.1136/bmjopen-2016-012221 (PMC5734200; doi:10.1136/bmjopen-2016-012221), 2017-07-02
Supplement: bmjopen-2016-012221supp001.pdf [file bmjopen-2016-012221supp001.pdf]

## Supplement 1. Questionnaire

Below are the questions on dietary behavior (in Dutch) from the questionnaire at baseline, T1, T2 of the DHIAAN study. Participants were interviewed by a trained interviewer. Answer cards with the answer categories for each question were provided.

### 1. Risicoperceptie

*Allereerst volgen er een aantal vragen over het risico op diabetes. Ik lees steeds een situatie voor en kunt u antwoorden of deze situatie uw risico op diabetes verhoogt of niet verhoogt?*

*Als u het niet weet, kunt u dat ook zeggen.*

**INT Als verhoogd risico onduidelijk is, dan aangeven dat dit hetzelfde is als meer kans**

1.1

| Heeft u een verhoogd risico op diabetes als u:     | Ja                       | Weet niet                | Nee                      |
|----------------------------------------------------|--------------------------|--------------------------|--------------------------|
| Van Hindostaans-Surinaamse afkomst bent?           | <input type="checkbox"/> | <input type="checkbox"/> | <input type="checkbox"/> |
| Veel witte rijst eet?                              | <input type="checkbox"/> | <input type="checkbox"/> | <input type="checkbox"/> |
| Weinig beweegt?                                    | <input type="checkbox"/> | <input type="checkbox"/> | <input type="checkbox"/> |
| Ongezond eet?                                      | <input type="checkbox"/> | <input type="checkbox"/> | <input type="checkbox"/> |
| Familie heeft met diabetes?                        | <input type="checkbox"/> | <input type="checkbox"/> | <input type="checkbox"/> |
| Ouder dan 35 jaar bent?                            | <input type="checkbox"/> | <input type="checkbox"/> | <input type="checkbox"/> |
| Een hoge bloeddruk heeft?                          | <input type="checkbox"/> | <input type="checkbox"/> | <input type="checkbox"/> |
| Rookt?                                             | <input type="checkbox"/> | <input type="checkbox"/> | <input type="checkbox"/> |
| In het verleden zwangerschapsdiabetes heeft gehad? | <input type="checkbox"/> | <input type="checkbox"/> | <input type="checkbox"/> |
| Veel masala eet?                                   | <input type="checkbox"/> | <input type="checkbox"/> | <input type="checkbox"/> |
| Overgewicht heeft?                                 | <input type="checkbox"/> | <input type="checkbox"/> | <input type="checkbox"/> |
| Veel suiker eet?                                   | <input type="checkbox"/> | <input type="checkbox"/> | <input type="checkbox"/> |

**Bent u het eens of oneens met de volgende stellingen. Misschien vindt u deze stellingen op elkaar lijken, maar geef toch elke keer het antwoord dat u het meest van u op toepassing vindt.**

**INT: Gebruik antwoordkaart 1 voor vragen 1.2 t/m 1.4**

1.2 Het is aannemelijk dat ik diabetes zal krijgen

- Helemaal mee eens
- Mee eens
- Niet mee eens/Niet mee oneens
- Niet mee eens
- Helemaal niet mee eens

1.3 Mijn kans op het krijgen van diabetes in de komende paar jaren is groot

- Helemaal mee eens
- Mee eens
- Niet mee eens/Niet mee oneens
- Niet mee eens
- Helemaal niet mee eens

1.4 Ik heb het gevoel dat ik ooit in mijn leven diabetes zal krijgen

- Helemaal mee eens  
 Mee eens  
 Niet mee eens/Niet mee oneens  
 Niet mee eens  
 Helemaal niet mee eens

## 6. Voeding 1

*De volgende vragen gaan over uw huidige eetpatroon.*

6.1 Hoeveel dagen van de week eet u fruit?

**INT Het gaat hierbij niet alleen om vers fruit, ook fruit uit blik of glas tellen mee**

- Elke dag, 7 keer per week  
 5 of 6 dagen per week  
 4 dagen per week of minder

6.2 Hoeveel fruit eet u dan per dag?

**INT Als één stuk fruit telt 1 (sinaas)appel, 1 banaan 2 mandarijnen of een schaalpje kleiner fruit zoals aardbeien. Het gaat niet alleen om vers fruit, ook fruit uit blik of glas tellen mee.**

- 2 stuks fruit of meer per dag  
 1 stuk fruit per dag  
 ik eet (bijna) nooit fruit

6.3 Hoe vaak drinkt u vruchtensappen, vers of uit pak of fles? Siroop moet u niet meetellen.

- Vaak (dagelijks)  
 Soms  
 Nooit (< 1 keer per week)

6.4 Hoe vaak eet u, tussendoor of bij uw maaltijd rauwkost of salade?

- 6 – 7 keer per week  
 3 – 5 keer per week  
 1-2 keer per week of minder

6.5 Hoeveel dagen van de week eet u groenten?

**INT Alle groenten tellen mee, ook voorgesneden groenten, Diepvriesgroenten en groenten uit pot of blik.**

**(Bij deze vraag telt rauwkost niet mee)**

- Elke dag, 7 keer per week  
 5 of 6 dagen per week  
 4 dagen per week of minder  
 (Bijna) nooit

6.6 Hoe vaak per week eet u een ochtendmaaltijd (ontbijt)?

- 6 – 7 keer per week  
 3 – 5 keer per week  
 1 – 2 keer per week

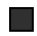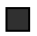

- Nooit, ik eet geen ochtendmaaltijd (ontbijt)
- 6.7 Hoe vaak per week eet u een middagmaaltijd (lunch)?  6 – 7 keer per week  
 3 – 5 keer per week  
 1 – 2 keer per week  
 Nooit, ik eet geen middagmaaltijd (lunch)
- 6.8 Hoe ziet uw maaltijdpatroon er op een dag uit?  Regelmatig maaltijdpatroon (ontbijt, lunch, avondmaaltijd)  
 Vast maaltijdpatroon (alleen lunch en avondmaaltijd)  
 Onregelmatig maaltijdpatroon (soms ontbijt, lunch, avondmaaltijd)
- 6.9 Hoe vaak per week eet u rijst?  6 – 7 keer per week  
 3 – 5 keer per week  
 1 – 2 keer per week  
 < 1 keer per week / (bijna) nooit
- 6.10 Welk soort rijst eet u?  Altijd witte rijst  
 Meestal witte rijst, af en toe zilvervliesrijst  
 Even vaak witte rijst als zilvervliesrijst  
 Meestal zilvervliesrijst, af en toe witte rijst  
 Altijd zilvervliesrijst  
 Ik eet (bijna) nooit rijst
- 6.11 Hoe vaak per week eet u brood zoals: sneetjes brood, puntjes, broodjes, bolletjes en broodvervangers beschuit, crackers, rijstwafels?  6 – 7 keer per week  
 3 – 5 keer per week  
 1 – 2 keer per week  
 < 1 keer per week / (bijna) nooit

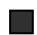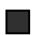

6.12 Als u brood of broodvervangers eet, welke soorten waren dat dan?

**INT: Gebruik Antwoordkaart 8**

|                                                               | Nooit                    | Soms                     | Vaak                     | Altijd                   |  | Weet niet                |
|---------------------------------------------------------------|--------------------------|--------------------------|--------------------------|--------------------------|--|--------------------------|
| 'Gewone' knäckebröd, beschuit, matzes, crackers of rijstwafel | <input type="checkbox"/> | <input type="checkbox"/> | <input type="checkbox"/> | <input type="checkbox"/> |  | <input type="checkbox"/> |
| Volkoren knäckebröd, beschuit, matzes of crackers             | <input type="checkbox"/> | <input type="checkbox"/> | <input type="checkbox"/> | <input type="checkbox"/> |  | <input type="checkbox"/> |
| Croissant                                                     | <input type="checkbox"/> | <input type="checkbox"/> | <input type="checkbox"/> | <input type="checkbox"/> |  | <input type="checkbox"/> |
| Witte krenten-, rozijnen-, muesli- bolletjes                  | <input type="checkbox"/> | <input type="checkbox"/> | <input type="checkbox"/> | <input type="checkbox"/> |  | <input type="checkbox"/> |
| Volkoren krenten-, rozijnen-, mueslibolletjes                 | <input type="checkbox"/> | <input type="checkbox"/> | <input type="checkbox"/> | <input type="checkbox"/> |  | <input type="checkbox"/> |
| Wit brood                                                     | <input type="checkbox"/> | <input type="checkbox"/> | <input type="checkbox"/> | <input type="checkbox"/> |  | <input type="checkbox"/> |
| Rogge-, volkoren- of mueslibrood                              | <input type="checkbox"/> | <input type="checkbox"/> | <input type="checkbox"/> | <input type="checkbox"/> |  | <input type="checkbox"/> |
| Bruin brood                                                   | <input type="checkbox"/> | <input type="checkbox"/> | <input type="checkbox"/> | <input type="checkbox"/> |  | <input type="checkbox"/> |
| 'gewone' ontbijtkoek                                          | <input type="checkbox"/> | <input type="checkbox"/> | <input type="checkbox"/> | <input type="checkbox"/> |  | <input type="checkbox"/> |
| Volkoren ontbijtkoek                                          | <input type="checkbox"/> | <input type="checkbox"/> | <input type="checkbox"/> | <input type="checkbox"/> |  | <input type="checkbox"/> |

**INT** Als respondent niet weet of hij/zij een volkoren of gewoon brood of broodvervanger eet, dan aangeven dat 'witte' of 'gewone' producten het meest standaard zijn. Als respondent het dan echt niet weet → weet niet invullen.

6.13 Bent uw binnen uw huishouden verantwoordelijk voor het bereiden van de warme maaltijd?

- Altijd
- Meestal
- Af en toe
- Bijna nooit
- Nooit

## 7. Voeding 2

**De volgende vragen gaan over hoe belangrijk of onbelangrijk u voeding en bepaalde aspecten van voeding vindt.**

7.1 Hoe belangrijk is het eten van gezonde voeding voor u?

- Heel belangrijk  
 Belangrijk  
 Niet belangrijk/niet onbelangrijk  
 Niet belangrijk  
 Totaal niet belangrijk

**INT: Gebruik Antwoordkaart 9**

*Ik ga nu een aantal van de aanbevelingen van het Voedingscentrum noemen. Misschien bent u ermee bekend. Allereerst is, volgens het Voedingscentrum, dagelijks 3 hoofdmaaltijden en maximaal 4 keer tussendoor eten het meest optimaal. Daarnaast adviseert het Voedingscentrum om tenminste twee ons groente en twee stuks fruit per dag te eten. Tot slot is het belangrijk voldoende voedingsvezel te eten. Dit kan, onder andere, door de voorkeur te geven aan volkoren brood en zilvervliesrijst in plaats van wit brood en witte rijst.*

**INT Dus: Volkoren producten zijn bijvoorbeeld bruin brood i.p.v. wit brood of roti van volkoren bloem i.p.v. witte bloem**

**Bij de volgende vragen willen we weten hoe belangrijk of onbelangrijk u de bovengenoemde adviezen vindt.**

7.2

**INT: Gebruik Antwoordkaart 9**

| Stelling                                                                                           | Heel belangrijk          | Belangrijk               | Niet belangrijk/<br>Niet onbelangrijk | Niet belangrijk          | Totaal niet belangrijk   |
|----------------------------------------------------------------------------------------------------|--------------------------|--------------------------|---------------------------------------|--------------------------|--------------------------|
| Het dagelijks eten van een ontbijt, vind ik..                                                      | <input type="checkbox"/> | <input type="checkbox"/> | <input type="checkbox"/>              | <input type="checkbox"/> | <input type="checkbox"/> |
| Het regelmatig eten, dat wil zeggen 3 keer per dag een maaltijd, vind ik (ontbijt + lunch + diner) | <input type="checkbox"/> | <input type="checkbox"/> | <input type="checkbox"/>              | <input type="checkbox"/> | <input type="checkbox"/> |
| Elke dag 2 ons groente eten vind ik                                                                | <input type="checkbox"/> | <input type="checkbox"/> | <input type="checkbox"/>              | <input type="checkbox"/> | <input type="checkbox"/> |
| Elke dag 2 stuks fruit eten vind ik                                                                | <input type="checkbox"/> | <input type="checkbox"/> | <input type="checkbox"/>              | <input type="checkbox"/> | <input type="checkbox"/> |
| Het eten van zilvervliesrijst, vind ik                                                             | <input type="checkbox"/> | <input type="checkbox"/> | <input type="checkbox"/>              | <input type="checkbox"/> | <input type="checkbox"/> |

7.2 vervolg

| Stelling                                                                | Heel belangrijk          | Belangrijk               | Niet belangrijk/<br>Niet onbelangrijk | Niet belangrijk          | Totaal niet belangrijk   | N.v.t.*                  |
|-------------------------------------------------------------------------|--------------------------|--------------------------|---------------------------------------|--------------------------|--------------------------|--------------------------|
| Het eten van volkoren producten, vind ik                                | <input type="checkbox"/> | <input type="checkbox"/> | <input type="checkbox"/>              | <input type="checkbox"/> | <input type="checkbox"/> | -                        |
| Elk hapje aannemen bij feestjes en/of religieuze bijeenkomsten, vind ik | <input type="checkbox"/> | <input type="checkbox"/> | <input type="checkbox"/>              | <input type="checkbox"/> | <input type="checkbox"/> | <input type="checkbox"/> |

\* INT: N.v.t. Alleen invullen als resp. nooit naar een feestje en religieuze bijeenkomst gaat.

*Ik noem opnieuw dezelfde aspecten uit de voeding. Wilt u nu aangeven of dit plezierig of onplezierig vindt om te doen?*

INT: Gebruik Antwoordkaart 10

7.3

| Stelling                                                                 | Plezierig                | Een beetje plezierig     | Niet plezierig/<br>niet onplezierig | Een beetje onplezierig   | Onplezierig              | N.v.t.*                  |
|--------------------------------------------------------------------------|--------------------------|--------------------------|-------------------------------------|--------------------------|--------------------------|--------------------------|
| Het dagelijks eten van een ontbijt, vind ik                              | <input type="checkbox"/> | <input type="checkbox"/> | <input type="checkbox"/>            | <input type="checkbox"/> | <input type="checkbox"/> | -                        |
| Het regelmatig eten, dat wil zeggen 3 keer per dag een maaltijd, vind ik | <input type="checkbox"/> | <input type="checkbox"/> | <input type="checkbox"/>            | <input type="checkbox"/> | <input type="checkbox"/> | -                        |
| Elke dag 2 ons groente eten, vind ik                                     | <input type="checkbox"/> | <input type="checkbox"/> | <input type="checkbox"/>            | <input type="checkbox"/> | <input type="checkbox"/> | -                        |
| Elke dag 2 stuks fruit eten, vind ik                                     | <input type="checkbox"/> | <input type="checkbox"/> | <input type="checkbox"/>            | <input type="checkbox"/> | <input type="checkbox"/> | -                        |
| Het eten van zilvervliesrijst, vind ik                                   | <input type="checkbox"/> | <input type="checkbox"/> | <input type="checkbox"/>            | <input type="checkbox"/> | <input type="checkbox"/> | -                        |
| Het eten van volkoren producten, vind ik                                 | <input type="checkbox"/> | <input type="checkbox"/> | <input type="checkbox"/>            | <input type="checkbox"/> | <input type="checkbox"/> | -                        |
| Elk hapje aannemen bij feestjes en/of religieuze bijeenkomsten, vind ik  | <input type="checkbox"/> | <input type="checkbox"/> | <input type="checkbox"/>            | <input type="checkbox"/> | <input type="checkbox"/> | <input type="checkbox"/> |

\* INT: N.v.t. Alleen invullen als resp. nooit naar een feestje en religieuze bijeenkomst gaat. De volgende uitspraken gaan over uw familieleden en of zij u stimuleren om gezonde voeding te eten. Ik ga nu verschillende elementen uit de voeding opnemen, kunt u mij zeggen hoe vaak familieleden u stimuleren om dat te doen? Ik bedoel hiermee familieleden die voor u belangrijk zijn en die u regelmatig ziet of spreekt.

INT: Gebruik Antwoordkaart 11

7.4

| Wordt u gestimuleerd door familieleden om..                    | Ja, heel vaak            | Ja, vaak                 | Ja, af en toe            | Nee, bijna nooit         | Nee, nooit               | N.v.t.*                  |
|----------------------------------------------------------------|--------------------------|--------------------------|--------------------------|--------------------------|--------------------------|--------------------------|
| Iedere dag te ontbijten?                                       | <input type="checkbox"/> | -                        |
| Regelmatig te eten (d.w.z. 3 hoofdmaaltijden per dag)?         | <input type="checkbox"/> | -                        |
| Meer groente te eten?                                          | <input type="checkbox"/> | -                        |
| Meer fruit te eten?                                            | <input type="checkbox"/> | -                        |
| Vaker zilvervliesrijst i.p.v. witte rijst te eten?             | <input type="checkbox"/> | -                        |
| vaker volkoren producten te eten?                              | <input type="checkbox"/> | -                        |
| Hapjes af te slaan bij feestjes en/of religieuze bijeenkomsten | <input type="checkbox"/> |

\* INT: N.v.t. Alleen invullen als resp. nooit naar een feestje en religieuze bijeenkomst gaat.

**De volgende vragen gaan over een aantal elementen uit de voeding. Kunt u bij de volgende aspecten aangeven in hoeverre het u het zou lukken als u vanaf vandaag dit aspect van voeding wilt verbeteren om dat ook op iedere dag te doen.**

**Met iedere dag bedoelen we 7 dagen in de week.**

**INT: Gebruik Antwoordkaart 12**

7.5

| Lukt het u om..                                                | Lukt me zeker wel        | Dat lukt me waarschijnlijk wel | Dat lukt misschien wel/ misschien niet | Dat lukt me waarschijnlijk niet | Dat lukt me zeker niet   | N.v.t.*                  |
|----------------------------------------------------------------|--------------------------|--------------------------------|----------------------------------------|---------------------------------|--------------------------|--------------------------|
| Iedere dag te ontbijten                                        | <input type="checkbox"/> | <input type="checkbox"/>       | <input type="checkbox"/>               | <input type="checkbox"/>        | <input type="checkbox"/> | -                        |
| Ik eet regelmatig (dat wil zeggen 3 hoofdmaaltijden per dag)   | <input type="checkbox"/> | <input type="checkbox"/>       | <input type="checkbox"/>               | <input type="checkbox"/>        | <input type="checkbox"/> | -                        |
| Iedere dag 2 ons groenten te eten                              | <input type="checkbox"/> | <input type="checkbox"/>       | <input type="checkbox"/>               | <input type="checkbox"/>        | <input type="checkbox"/> | -                        |
| Iedere dag 2 stuks fruit te eten                               | <input type="checkbox"/> | <input type="checkbox"/>       | <input type="checkbox"/>               | <input type="checkbox"/>        | <input type="checkbox"/> | -                        |
| zilvervliesrijst i.p.v. witte rijst te eten                    | <input type="checkbox"/> | <input type="checkbox"/>       | <input type="checkbox"/>               | <input type="checkbox"/>        | <input type="checkbox"/> | -                        |
| volkorenproducten i.p.v. witte producten te eten               | <input type="checkbox"/> | <input type="checkbox"/>       | <input type="checkbox"/>               | <input type="checkbox"/>        | <input type="checkbox"/> | -                        |
| Hapjes af te slaan bij feestjes en/of religieuze bijeenkomsten | <input type="checkbox"/> | <input type="checkbox"/>       | <input type="checkbox"/>               | <input type="checkbox"/>        | <input type="checkbox"/> | <input type="checkbox"/> |

\* INT: N.v.t. Alleen invullen als resp. nooit naar een feestje en religieuze bijeenkomst gaat.



**De volgende vraag gaat over wat u in de toekomst van plan bent met betrekking tot uw voeding. Hierna lees ik enkele uitspraken op die daar mee te maken hebben. Kunt u zeggen welke uitspraak het beste bij u past?**

**INT: Gebruik Antwoordkaart 13**

7.6 Ik noem nu enkele stellingen op. Kunt u steeds aangeven welke antwoordoptie het beste bij u past?

|                                                              | <b>Ja,<br/>al 6<br/>maanden<br/>of langer</b> | <b>Ja,<br/>Sinds kort<br/>(minder dan<br/>6 maanden)</b> | <b>Nee,<br/>Maar van plan<br/>binnen 1<br/>maand te gaan<br/>doen</b> | <b>Nee,<br/>Maar van plan<br/>binnen 6<br/>maanden te<br/>gaan doen</b> | <b>Nee,<br/>Ook niet van<br/>plan</b> |
|--------------------------------------------------------------|-----------------------------------------------|----------------------------------------------------------|-----------------------------------------------------------------------|-------------------------------------------------------------------------|---------------------------------------|
|                                                              | <i>JA &gt;6<br/>maanden</i>                   | <i>JA &lt; 6<br/>maanden</i>                             | <i>NEE, maar wel<br/>&lt;1 maand</i>                                  | <i>NEE, maar wel<br/>&lt;6 maanden</i>                                  | <i>NEE</i>                            |
| Ik ontbijt iedere dag                                        | <input type="checkbox"/>                      | <input type="checkbox"/>                                 | <input type="checkbox"/>                                              | <input type="checkbox"/>                                                | <input type="checkbox"/>              |
| Ik eet regelmatig (dat wil zeggen 3 hoofdmaaltijden per dag) | <input type="checkbox"/>                      | <input type="checkbox"/>                                 | <input type="checkbox"/>                                              | <input type="checkbox"/>                                                | <input type="checkbox"/>              |
| Ik eet iedere dag 2 ons groente                              | <input type="checkbox"/>                      | <input type="checkbox"/>                                 | <input type="checkbox"/>                                              | <input type="checkbox"/>                                                | <input type="checkbox"/>              |
| Ik eet iedere dag 2 stuks fruit                              | <input type="checkbox"/>                      | <input type="checkbox"/>                                 | <input type="checkbox"/>                                              | <input type="checkbox"/>                                                | <input type="checkbox"/>              |
| Ik eet zilvervliesrijst i.p.v witte rijst                    | <input type="checkbox"/>                      | <input type="checkbox"/>                                 | <input type="checkbox"/>                                              | <input type="checkbox"/>                                                | <input type="checkbox"/>              |
| Ik eet volkorenproducten i.p.v. witte producten              | <input type="checkbox"/>                      | <input type="checkbox"/>                                 | <input type="checkbox"/>                                              | <input type="checkbox"/>                                                | <input type="checkbox"/>              |
