# Supplementary material for: Effectiveness of a targeted lifestyle intervention in primary care on diet and physical activity among South Asians at risk for diabetes: 2-year results of a randomised controlled trial in the Netherlands
Source: PubMed Central journal article supplement — BMJ Open. 2017 Jul 2;7(6):e012221. doi: 10.1136/bmjopen-2016-012221 (PMC5734200; doi:10.1136/bmjopen-2016-012221), 2017-07-02
Supplement: bmjopen-2016-012221supp002.pdf [file bmjopen-2016-012221supp002.pdf]

**SUPPLEMENT 2. Comparison of baseline characteristics, physical activity, dietary behaviour and motivational stage of participants in the present analysis and those who were excluded**

|                                                                                       | <b>In present analysis<br/>(N=314)</b> | <b>Excluded<br/>(N=222)</b> | <b>p-value</b> |
|---------------------------------------------------------------------------------------|----------------------------------------|-----------------------------|----------------|
| <b>Male</b>                                                                           | 152 (48.6)                             | 112 (50.5)                  | 0.667          |
| <b>Mean age (years)</b>                                                               | 44.8 (43.6-46.0)                       | 41.6 (40.2-43.0)            | <b>0.001</b>   |
| <b>Low education</b>                                                                  | 36 (11.8)                              | 25 (11.6)                   | 0.925          |
| <b>Family history of diabetes</b>                                                     | 227 (74.7)                             | 171 (78.4)                  | 0.318          |
| <b>Mean body mass index</b>                                                           | 27.3 (27.0-27.9)                       | 27.4 (26.7-27.9)            | 0.889          |
| <b>Mean fasting plasma glucose</b>                                                    | 5.3 (5.2-5.4)                          | 5.3 (5.2-5.4)               | 0.803          |
| <b>Mean 2-h post-load glucose</b>                                                     | 6.0 (5.8-6.2)                          | 6.0 (5.8-6.3)               | 0.907          |
| <b>Mean glycated haemoglobin</b>                                                      | 5.7 (5.6-5.7)                          | 5.6 (5.6-5.7)               | 0.092          |
| <b>Median HOMA-IR</b>                                                                 | 3.0 (2.2-4.0)                          | 3.2 (2.4-4.4)               | <b>0.048</b>   |
| <b>Mean total activity (min/week)</b>                                                 | 2600.8 (2473.5-<br>2728.0)             | 2663.6 (2497.8-<br>2829.3)  | 0.490          |
| <b>Fruit: 2 pieces /day</b>                                                           | 126 (40.3)                             | 97 (46.2)                   | 0.179          |
| <b>Vegetables: 200 g/day</b>                                                          | 196 (62.4)                             | 131 (62.4)                  | 0.993          |
| <b>Whole wheat: almost exclusively</b>                                                | 22 (7.0)                               | 11 (5.2)                    | 0.414          |
| <b>Meal pattern: 3 meals/day at<br/>regular times</b>                                 | 176 (56.4)                             | 103 (49.0)                  | 0.098          |
| <b>Brown rice: almost exclusively</b>                                                 | 32 (10.2)                              | 24 (11.5)                   | 0.649          |
| <b>Stage of change- motivated to<br/>change physical activity within 6<br/>months</b> | 204 (65.0)                             | 148 (66.7)                  | 0.683          |
| <b>Stage of change: motivated to<br/>change diet within 6 months</b>                  | 288 (91.7)                             | 188 (90.0)                  | 0.489          |

Data are presented as means (95%-confidence interval), median (interquartile range) or *n* (percentage);

HOMA-IR, Homeostasis Model of Assessment-Insulin Resistance.
